# Supplementary material
Source: MDPI journal article supplement (https://www.mdpi.com/1999-4907/14/6/1095)
Supplement: s1 [file s1]

**Supplementary Figure S5.** Alignment of *rbcL* from *P. densiflora* and *P. sylvestris*

[illegible]

|                                  |     |            |            |            |            |            |            |            |            |     |
|----------------------------------|-----|------------|------------|------------|------------|------------|------------|------------|------------|-----|
| <i>P. densiflora</i> (JN854210)  | 241 | AAGGGGCGAT | GCTATGACAT | CGAGCCCCTT | CCTGGAGAGG | AGACTCAATT | TATTGCCTAT | GTAGCTTACC | CCTTAGACCT | 320 |
| <i>P. densiflora</i> (JQ512574)  | 241 | AAGGGGCGAT | GCTATGACAT | CGAGCCCCTT | CCTGGAGAGG | AGACTCAATT | TATTGCCTAT | GTAGCTTACC | CCTTAGACCT | 320 |
| <i>P. densiflora</i> (MF990371)  | 241 | AAGGGGCGAT | GCTATGACAT | CGAGCCCCTT | CCTGGAGAGG | AGACTCAATT | TATTGCCTAT | GTAGCTTACC | CCTTAGACCT | 320 |
| <i>P. densiflora</i> (MT786135)  | 241 | AAGGGGCGAT | GCTATGACAT | CGAGCCCCTT | CCTGGAGAGG | AGACTCAATT | TATTGCCTAT | GTAGCTTACC | CCTTAGACCT | 320 |
| <i>P. densiflora</i> (MZ677091)  | 241 | AAGGGGCGAT | GCTATGACAT | CGAGCCCCTT | CCTGGAGAGG | AGACTCAATT | TATTGCCTAT | GTAGCTTACC | CCTTAGACCT | 320 |
| <i>P. densiflora</i> (NC_042394) | 241 | AAGGGGCGAT | GCTATGACAT | CGAGCCCCTT | CCTGGAGAGG | AGACTCAATT | TATTGCCTAT | GTAGCTTACC | CCTTAGACCT | 320 |
| <i>P. densiflora</i> (NC_062639) | 241 | AAGGGGCGAT | GCTATGACAT | CGAGCCCCTT | CCTGGAGAGG | AGACTCAATT | TATTGCCTAT | GTAGCTTACC | CCTTAGACCT | 320 |
| <i>P. densiflora</i> (NC_062640) | 241 | AAGGGGCGAT | GCTATGACAT | CGAGCCCCTT | CCTGGAGAGG | AGACTCAATT | TATTGCCTAT | GTAGCTTACC | CCTTAGACCT | 320 |
| <i>P. sylvestris</i> (JN854158)  | 241 | AAGGGGCGAT | GCTATGACAT | CGAGCCCCTT | CCTGGAGAGG | AGACTCAATT | TATTGCCTAT | GTAGCTTACC | CCTTAGACCT | 320 |
| <i>P. sylvestris</i> (KR476379)  | 241 | AAGGGGCGAT | GCTATGACAT | CGAGCCCCTT | CCTGGAGAGG | AGACTCAATT | TATTGCCTAT | GTAGCTTACC | CCTTAGACCT | 320 |
| <i>P. sylvestris</i> (MT787466)  | 241 | AAGGGGCGAT | GCTATGACAT | CGAGCCCCTT | CCTGGAGAGG | AGACTCAATT | TATTGCCTAT | GTAGCTTACC | CCTTAGACCT | 320 |
| <i>P. sylvestris</i> (MT796488)  | 241 | AAGGGGCGAT | GCTATGACAT | CGAGCCCCTT | CCTGGAGAGG | AGACTCAATT | TATTGCCTAT | GTAGCTTACC | CCTTAGACCT | 320 |

|                                  |     |            |           |            |            |            |            |            |            |     |
|----------------------------------|-----|------------|-----------|------------|------------|------------|------------|------------|------------|-----|
| <i>P. densiflora</i> (JN854210)  | 321 | TTTCGAAGAA | GGTCTGTGA | CTAACTTGTT | CACTTCCATT | GTAGGTAATG | TATTTGGATT | CAAGGCCTTA | CGGGCTCTAC | 400 |
| <i>P. densiflora</i> (JQ512574)  | 321 | TTTCGAAGAA | GGTCTGTGA | CTAACTTGTT | CACTTCCATT | GTAGGTAATG | TATTTGGATT | CAAGGCCTTA | CGGGCTCTAC | 400 |
| <i>P. densiflora</i> (MF990371)  | 321 | TTTCGAAGAA | GGTCTGTGA | CTAACTTGTT | CACTTCCATT | GTAGGTAATG | TATTTGGATT | CAAGGCCTTA | CGGGCTCTAC | 400 |
| <i>P. densiflora</i> (MT786135)  | 321 | TTTCGAAGAA | GGTCTGTGA | CTAACTTGTT | CACTTCCATT | GTAGGTAATG | TATTTGGATT | CAAGGCCTTA | CGGGCTCTAC | 400 |
| <i>P. densiflora</i> (MZ677091)  | 321 | TTTCGAAGAA | GGTCTGTGA | CTAACTTGTT | CACTTCCATT | GTAGGTAATG | TATTTGGATT | CAAGGCCTTA | CGGGCTCTAC | 400 |
| <i>P. densiflora</i> (NC_042394) | 321 | TTTCGAAGAA | GGTCTGTGA | CTAACTTGTT | CACTTCCATT | GTAGGTAATG | TATTTGGATT | CAAGGCCTTA | CGGGCTCTAC | 400 |
| <i>P. densiflora</i> (NC_062639) | 321 | TTTCGAAGAA | GGTCTGTGA | CTAACTTGTT | CACTTCCATT | GTAGGTAATG | TATTTGGATT | CAAGGCCTTA | CGGGCTCTAC | 400 |
| <i>P. densiflora</i> (NC_062640) | 321 | TTTCGAAGAA | GGTCTGTGA | CTAACTTGTT | CACTTCCATT | GTAGGTAATG | TATTTGGATT | CAAGGCCTTA | CGGGCTCTAC | 400 |
| <i>P. sylvestris</i> (JN854158)  | 321 | TTTCGAAGAA | GGTCTGTGA | CTAACTTGTT | CACTTCCATT | GTAGGTAATG | TATTTGGATT | CAAGGCCTTA | CGGGCTCTAC | 400 |
| <i>P. sylvestris</i> (KR476379)  | 321 | TTTCGAAGAA | GGTCTGTGA | CTAACTTGTT | CACTTCCATT | GTAGGTAATG | TATTTGGATT | CAAGGCCTTA | CGGGCTCTAC | 400 |
| <i>P. sylvestris</i> (MT787466)  | 321 | TTTCGAAGAA | GGTCTGTGA | CTAACTTGTT | CACTTCCATT | GTAGGTAATG | TATTTGGATT | CAAGGCCTTA | CGGGCTCTAC | 400 |
| <i>P. sylvestris</i> (MT796488)  | 321 | TTTCGAAGAA | GGTCTGTGA | CTAACTTGTT | CACTTCCATT | GTAGGTAATG | TATTTGGATT | CAAGGCCTTA | CGGGCTCTAC | 400 |

|                                  |     |            |            |            |            |            |            |            |            |     |
|----------------------------------|-----|------------|------------|------------|------------|------------|------------|------------|------------|-----|
| <i>P. densiflora</i> (JN854210)  | 401 | GTTTGGAAGA | TTTGCGGATT | CCCCCTTCTT | ATTCCAAAAC | TTTTCAGGGT | CCACCTCATG | GTATCCAAGT | TGAAAGAGAT | 480 |
| <i>P. densiflora</i> (JQ512574)  | 401 | GTTTGGAAGA | TTTGCGGATT | CCCCCTTCTT | ATTCCAAAAC | TTTTCAGGGT | CCACCTCATG | GTATCCAAGT | TGAAAGAGAT | 480 |
| <i>P. densiflora</i> (MF990371)  | 401 | GTTTGGAAGA | TTTGCGGATT | CCCCCTTCTT | ATTCCAAAAC | TTTTCAGGGT | CCACCTCATG | GTATCCAAGT | TGAAAGAGAT | 480 |
| <i>P. densiflora</i> (MT786135)  | 401 | GTTTGGAAGA | TTTGCGGATT | CCCCCTTCTT | ATTCCAAAAC | TTTTCAGGGT | CCACCTCATG | GTATCCAAGT | TGAAAGAGAT | 480 |
| <i>P. densiflora</i> (MZ677091)  | 401 | GTTTGGAAGA | TTTGCGGATT | CCCCCTTCTT | ATTCCAAAAC | TTTTCAGGGT | CCACCTCATG | GTATCCAAGT | TGAAAGAGAT | 480 |
| <i>P. densiflora</i> (NC_042394) | 401 | GTTTGGAAGA | TTTGCGGATT | CCCCCTTCTT | ATTCCAAAAC | TTTTCAGGGT | CCACCTCATG | GTATCCAAGT | TGAAAGAGAT | 480 |
| <i>P. densiflora</i> (NC_062639) | 401 | GTTTGGAAGA | TTTGCGGATT | CCCCCTTCTT | ATTCCAAAAC | TTTTCAGGGT | CCACCTCATG | GTATCCAAGT | TGAAAGAGAT | 480 |
| <i>P. densiflora</i> (NC_062640) | 401 | GTTTGGAAGA | TTTGCGGATT | CCCCCTTCTT | ATTCCAAAAC | TTTTCAGGGT | CCACCTCATG | GTATCCAAGT | TGAAAGAGAT | 480 |
| <i>P. sylvestris</i> (JN854158)  | 401 | GTTTGGAAGA | TTTGCGGATT | CCCCCTTCTT | ATTCCAAAAC | TTTTCAGGGT | CCACCTCATG | GTATCCAAGT | TGAAAGAGAT | 480 |
| <i>P. sylvestris</i> (KR476379)  | 401 | GTTTGGAAGA | TTTGCGGATT | CCCCCTTCTT | ATTCCAAAAC | TTTTCAGGGT | CCACCTCATG | GTATCCAAGT | TGAAAGAGAT | 480 |
| <i>P. sylvestris</i> (MT787466)  | 401 | GTTTGGAAGA | TTTGCGGATT | CCCCCTTCTT | ATTCCAAAAC | TTTTCAGGGT | CCACCTCATG | GTATCCAAGT | TGAAAGAGAT | 480 |
| <i>P. sylvestris</i> (MT796488)  | 401 | GTTTGGAAGA | TTTGCGGATT | CCCCCTTCTT | ATTCCAAAAC | TTTTCAGGGT | CCACCTCATG | GTATCCAAGT | TGAAAGAGAT | 480 |

|                                  |     |            |            |            |            |            |            |            |            |     |
|----------------------------------|-----|------------|------------|------------|------------|------------|------------|------------|------------|-----|
| <i>P. densiflora</i> (JN854210)  | 481 | AAATTGAACA | AATATGGTCG | TCCTTTATTG | GGATGTACTA | TCAAACCAAA | ATTGGGTCTA | TCAGCCAAAA | ACTATGGTAG | 560 |
| <i>P. densiflora</i> (JQ512574)  | 481 | AAATTGAACA | AATATGGTCG | TCCTTTATTG | GGATGTACTA | TCAAACCAAA | ATTGGGTCTA | TCAGCCAAAA | ACTATGGTAG | 560 |
| <i>P. densiflora</i> (MF990371)  | 481 | AAATTGAACA | AATATGGTCG | TCCTTTATTG | GGATGTACTA | TCAAACCAAA | ATTGGGTCTA | TCAGCCAAAA | ACTATGGTAG | 560 |
| <i>P. densiflora</i> (MT786135)  | 481 | AAATTGAACA | AATATGGTCG | TCCTTTATTG | GGATGTACTA | TCAAACCAAA | ATTGGGTCTA | TCAGCCAAAA | ACTATGGTAG | 560 |
| <i>P. densiflora</i> (MZ677091)  | 481 | AAATTGAACA | AATATGGTCG | TCCTTTATTG | GGATGTACTA | TCAAACCAAA | ATTGGGTCTA | TCAGCCAAAA | ACTATGGTAG | 560 |
| <i>P. densiflora</i> (NC_042394) | 481 | AAATTGAACA | AATATGGTCG | TCCTTTATTG | GGATGTACTA | TCAAACCAAA | ATTGGGTCTA | TCAGCCAAAA | ACTATGGTAG | 560 |
| <i>P. densiflora</i> (NC_062639) | 481 | AAATTGAACA | AATATGGTCG | TCCTTTATTG | GGATGTACTA | TCAAACCAAA | ATTGGGTCTA | TCAGCCAAAA | ACTATGGTAG | 560 |
| <i>P. densiflora</i> (NC_062640) | 481 | AAATTGAACA | AATATGGTCG | TCCTTTATTG | GGATGTACTA | TCAAACCAAA | ATTGGGTCTA | TCAGCCAAAA | ACTATGGTAG | 560 |
| <i>P. sylvestris</i> (JN854158)  | 481 | AAATTGAACA | AATATGGTCG | TCCTTTATTG | GGATGTACTA | TCAAACCAAA | ATTGGGTCTA | TCAGCCAAAA | ACTATGGTAG | 560 |
| <i>P. sylvestris</i> (KR476379)  | 481 | AAATTGAACA | AATATGGTCG | TCCTTTATTG | GGATGTACTA | TCAAACCAAA | ATTGGGTCTA | TCAGCCAAAA | ACTATGGTAG | 560 |
| <i>P. sylvestris</i> (MT787466)  | 481 | AAATTGAACA | AATATGGTCG | TCCTTTATTG | GGATGTACTA | TCAAACCAAA | ATTGGGTCTA | TCAGCCAAAA | ACTATGGTAG | 560 |
| <i>P. sylvestris</i> (MT796488)  | 481 | AAATTGAACA | AATATGGTCG | TCCTTTATTG | GGATGTACTA | TCAAACCAAA | ATTGGGTCTA | TCAGCCAAAA | ACTATGGTAG | 560 |

|                                  |     |            |            |            |            |            |            |            |            |     |
|----------------------------------|-----|------------|------------|------------|------------|------------|------------|------------|------------|-----|
| <i>P. densiflora</i> (JN854210)  | 561 | AGCAGTTTAC | GAATGTCTCC | GTGGTGGACT | CGATTTTACT | AAGGATGATG | AGAACGTAAA | TTCCCAACCA | TTCATGCGCT | 640 |
| <i>P. densiflora</i> (JQ512574)  | 561 | AGCAGTTTAC | GAATGTCTCC | GTGGTGGACT | CGATTTTACT | AAGGATGATG | AGAACGTAAA | TTCCCAACCA | TTCATGCGCT | 640 |
| <i>P. densiflora</i> (MF990371)  | 561 | AGCAGTTTAC | GAATGTCTCC | GTGGTGGACT | CGATTTTACT | AAGGATGATG | AGAACGTAAA | TTCCCAACCA | TTCATGCGCT | 640 |
| <i>P. densiflora</i> (MT786135)  | 561 | AGCAGTTTAC | GAATGTCTCC | GTGGTGGACT | CGATTTTACT | AAGGATGATG | AGAACGTAAA | TTCCCAACCA | TTCATGCGCT | 640 |
| <i>P. densiflora</i> (MZ677091)  | 561 | AGCAGTTTAC | GAATGTCTCC | GTGGTGGACT | CGATTTTACT | AAGGATGATG | AGAACGTAAA | TTCCCAACCA | TTCATGCGCT | 640 |
| <i>P. densiflora</i> (NC_042394) | 561 | AGCAGTTTAC | GAATGTCTCC | GTGGTGGACT | CGATTTTACT | AAGGATGATG | AGAACGTAAA | TTCCCAACCA | TTCATGCGCT | 640 |
| <i>P. densiflora</i> (NC_062639) | 561 | AGCAGTTTAC | GAATGTCTCC | GTGGTGGACT | CGATTTTACT | AAGGATGATG | AGAACGTAAA | TTCCCAACCA | TTCATGCGCT | 640 |
| <i>P. densiflora</i> (NC_062640) | 561 | AGCAGTTTAC | GAATGTCTCC | GTGGTGGACT | CGATTTTACT | AAGGATGATG | AGAACGTAAA | TTCCCAACCA | TTCATGCGCT | 640 |
| <i>P. sylvestris</i> (JN854158)  | 561 | AGCAGTTTAC | GAATGTCTCC | GTGGTGGACT | CGATTTTACT | AAGGATGATG | AGAACGTAAA | TTCCCAACCA | TTCATGCGCT | 640 |
| <i>P. sylvestris</i> (KR476379)  | 561 | AGCAGTTTAC | GAATGTCTCC | GTGGTGGACT | CGATTTTACT | AAGGATGATG | AGAACGTAAA | TTCCCAACCA | TTCATGCGCT | 640 |
| <i>P. sylvestris</i> (MT787466)  | 561 | AGCAGTTTAC | GAATGTCTCC | GTGGTGGACT | CGATTTTACT | AAGGATGATG | AGAACGTAAA | TTCCCAACCA | TTCATGCGCT | 640 |
| <i>P. sylvestris</i> (MT796488)  | 561 | AGCAGTTTAC | GAATGTCTCC | GTGGTGGACT | CGATTTTACT | AAGGATGATG | AGAACGTAAA | TTCCCAACCA | TTCATGCGCT | 640 |

|                                  |     |            |            |            |            |            |            |                      |                      |     |  |
|----------------------------------|-----|------------|------------|------------|------------|------------|------------|----------------------|----------------------|-----|--|
|                                  |     |            |            |            |            |            |            | *                    | *                    | *   |  |
| <i>P. densiflora</i> (JN854210)  | 641 | GGAGAGATCG | TTTTGTCTTT | TGTGCGGAAG | CAATTAATAA | GGCCCAGGCT | GAGACGGGTG | AAAT <b>T</b> TAAGGG | ACATTAT <b>T</b> TTG | 720 |  |
| <i>P. densiflora</i> (JQ512574)  | 641 | GGAGAGATCG | TTTTGTCTTT | TGTGCGGAAG | CAATTAATAA | GGCCCAGGCT | GAGACGGGTG | AAAT <b>T</b> TAAGGG | ACATTAT <b>T</b> TTG | 720 |  |
| <i>P. densiflora</i> (MF990371)  | 641 | GGAGAGATCG | TTTTGTCTTT | TGTGCGGAAG | CAATTAATAA | GGCCCAGGCT | GAGACGGGTG | AAAT <b>T</b> TAAGGG | ACATTAT <b>T</b> TTG | 720 |  |
| <i>P. densiflora</i> (MT786135)  | 641 | GGAGAGATCG | TTTTGTCTTT | TGTGCGGAAG | CAATTAATAA | GGCCCAGGCT | GAGACGGGTG | AAAT <b>T</b> TAAGGG | ACATTAT <b>T</b> TTG | 720 |  |
| <i>P. densiflora</i> (MZ677091)  | 641 | GGAGAGATCG | TTTTGTCTTT | TGTGCGGAAG | CAATTAATAA | GGCCCAGGCT | GAGACGGGTG | AAAT <b>T</b> TAAGGG | ACATTAT <b>T</b> TTG | 720 |  |
| <i>P. densiflora</i> (NC_042394) | 641 | GGAGAGATCG | TTTTGTCTTT | TGTGCGGAAG | CAATTAATAA | GGCCCAGGCT | GAGACGGGTG | AAAT <b>T</b> TAAGGG | ACATTAT <b>T</b> TTG | 720 |  |
| <i>P. densiflora</i> (NC_062639) | 641 | GGAGAGATCG | TTTTGTCTTT | TGTGCGGAAG | CAATTAATAA | GGCCCAGGCT | GAGACGGGTG | AAAT <b>T</b> TAAGGG | ACATTAT <b>T</b> TTG | 720 |  |
| <i>P. densiflora</i> (NC_062640) | 641 | GGAGAGATCG | TTTTGTCTTT | TGTGCGGAAG | CAATTAATAA | GGCCCAGGCT | GAGACGGGTG | AAAT <b>T</b> TAAGGG | ACATTAT <b>T</b> TTG | 720 |  |
| <i>P. sylvestris</i> (JN854158)  | 641 | GGAGAGATCG | TTTTGTCTTT | TGTGCGGAAG | CAATTAATAA | GGCCCAGGCT | GAGACGGGTG | AAAT <b>T</b> TAAGGG | ACATTAT <b>T</b> TTG | 720 |  |
| <i>P. sylvestris</i> (KR476379)  | 641 | GGAGAGATCG | TTTTGTCTTT | TGTGCGGAAG | CAATTAATAA | GGCCCAGGCT | GAGACGGGTG | AAAT <b>T</b> TAAGGG | ACATTAT <b>T</b> TTG | 720 |  |
| <i>P. sylvestris</i> (MT787466)  | 641 | GGAGAGATCG | TTTTGTCTTT | TGTGCGGAAG | CAATTAATAA | GGCCCAGGCT | GAGACGGGTG | AAAT <b>T</b> TAAGGG | ACATTAT <b>T</b> TTG | 720 |  |
| <i>P. sylvestris</i> (MT796488)  | 641 | GGAGAGATCG | TTTTGTCTTT | TGTGCGGAAG | CAATTAATAA | GGCCCAGGCT | GAGACGGGTG | AAAC <b>T</b> TAAGGA | ACATTAC <b>T</b> TTG | 720 |  |

|                                  |     |            |            |            |            |   |            |            |             |            |     |
|----------------------------------|-----|------------|------------|------------|------------|---|------------|------------|-------------|------------|-----|
| <i>P. densiflora</i> (JN854210)  | 721 | AATGCTACTG | CAGGTACATG | TGAAGAAATG | ATGAAAAGGG | ★ | CAGTATTTGC | AAGAGAATTG | GGAGCTCCTA  | TCGTTATGCA | 800 |
| <i>P. densiflora</i> (JQ512574)  | 721 | AATGCTACTG | CAGGTACATG | TGAAGAAATG | ATGAAAAGGG |   | CAGTATTTGC | AAGAGAATTG | GGAGCTCCTA  | TCGTTATGCA | 800 |
| <i>P. densiflora</i> (MF990371)  | 721 | AATGCTACTG | CAGGTACATG | TGAAGAAATG | ATGAAAAGGG |   | CAGTATTTGC | AAGAGAATTG | GGAGCTCCTA  | TCGTTATGCA | 800 |
| <i>P. densiflora</i> (MT786135)  | 721 | AATGCTACTG | CAGGTACATG | TGAAGAAATG | ATGAAAAGGG |   | CAGTATTTGC | AAGAGAATTG | GGAGCTCCTA  | TCGTTATGCA | 800 |
| <i>P. densiflora</i> (MZ677091)  | 721 | AATGCTACTG | CAGGTACATG | TGAAGAAATG | ATGAAAAGGG |   | CAATATTTGC | AAGAGAATTG | GGAGTTCCCTA | TCGTTATGCA | 800 |
| <i>P. densiflora</i> (NC_042394) | 721 | AATGCTACTG | CAGGTACATG | TGAAGAAATG | ATGAAAAGGG |   | CAGTATTTGC | AAGAGAATTG | GGAGCTCCTA  | TCGTTATGCA | 800 |
| <i>P. densiflora</i> (NC_062639) | 721 | AATGCTACTG | CAGGTACATG | TGAAGAAATG | ATGAAAAGGG |   | CAATATTTGC | AAGAGAATTG | GGAGTTCCCTA | TCGTTATGCA | 800 |
| <i>P. densiflora</i> (NC_062640) | 721 | AATGCTACTG | CAGGTACATG | TGAAGAAATG | ATGAAAAGGG |   | CAATATTTGC | AAGAGAATTG | GGAGTTCCCTA | TCGTTATGCA | 800 |
| <i>P. sylvestris</i> (JN854158)  | 721 | AATGCTACTG | CAGGTACATG | TGAAGAAATG | ATGAAAAGGG |   | CAATATTTGC | AAGAGAATTG | GGAGTTCCCTA | TCGTTATGCA | 800 |
| <i>P. sylvestris</i> (KR476379)  | 721 | AATGCTACTG | CAGGTACATG | TGAAGAAATG | ATGAAAAGGG |   | CAATATTTGC | AAGAGAATTG | GGAGTTCCCTA | TCGTTATGCA | 800 |
| <i>P. sylvestris</i> (MT787466)  | 721 | AATGCTACTG | CAGGTACATG | TGAAGAAATG | ATGAAAAGGG |   | CAATATTTGC | AAGAGAATTG | GGAGTTCCCTA | TCGTTATGCA | 800 |
| <i>P. sylvestris</i> (MT796488)  | 721 | AATGCTACTG | CAGGTACATG | TGAAGAAATG | ATGAAAAGGG |   | CAATATTTGC | AAGAGAATTG | GGAGTTCCCTA | TCGTTATGCA | 800 |
|                                  |     |            |            |            |            |   |            |            |             |            |     |
| <i>P. densiflora</i> (JN854210)  | 801 | TGACTACCTG | ACGGGAGGTT | TTACCGCAAA | TACTTCTTTG |   | GCTCATTATT | GCCGAGACAA | CGGCCTACTT  | CTTCACATTC | 880 |
| <i>P. densiflora</i> (JQ512574)  | 801 | TGACTACCTG | ACGGGAGGTT | TTACCGCAAA | TACTTCTTTG |   | GCTCATTATT | GCCGAGACAA | CGGCCTACTT  | CTTCACATTC | 880 |
| <i>P. densiflora</i> (MF990371)  | 801 | TGACTACCTG | ACGGGAGGTT | TTACCGCAAA | TACTTCTTTG |   | GCTCATTATT | GCCGAGACAA | CGGCCTACTT  | CTTCACATTC | 880 |
| <i>P. densiflora</i> (MT786135)  | 801 | TGACTACCTG | ACGGGAGGTT | TTACCGCAAA | TACTTCTTTG |   | GCTCATTATT | GCCGAGACAA | CGGCCTACTT  | CTTCACATTC | 880 |
| <i>P. densiflora</i> (MZ677091)  | 801 | TGACTACCTG | ACGGGAGGTT | TTACCGCAAA | TACTTCTTTG |   | GCTCATTATT | GCCGAGACAA | CGGCCTACTT  | CTTCACATTC | 880 |
| <i>P. densiflora</i> (NC_042394) | 801 | TGACTACCTG | ACGGGAGGTT | TTACCGCAAA | TACTTCTTTG |   | GCTCATTATT | GCCGAGACAA | CGGCCTACTT  | CTTCACATTC | 880 |
| <i>P. densiflora</i> (NC_062639) | 801 | TGACTACCTG | ACGGGAGGTT | TTACCGCAAA | TACTTCTTTG |   | GCTCATTATT | GCCGAGACAA | CGGCCTACTT  | CTTCACATTC | 880 |
| <i>P. densiflora</i> (NC_062640) | 801 | TGACTACCTG | ACGGGAGGTT | TTACCGCAAA | TACTTCTTTG |   | GCTCATTATT | GCCGAGACAA | CGGCCTACTT  | CTTCACATTC | 880 |
| <i>P. sylvestris</i> (JN854158)  | 801 | TGACTACCTG | ACGGGAGGTT | TTACCGCAAA | TACTTCTTTG |   | GCTCATTATT | GCCGAGACAA | CGGCCTACTT  | CTTCACATTC | 880 |
| <i>P. sylvestris</i> (KR476379)  | 801 | TGACTACCTG | ACGGGAGGTT | TTACCGCAAA | TACTTCTTTG |   | GCTCATTATT | GCCGAGACAA | CGGCCTACTT  | CTTCACATTC | 880 |
| <i>P. sylvestris</i> (MT787466)  | 801 | TGACTACCTG | ACGGGAGGTT | TTACCGCAAA | TACTTCTTTG |   | GCTCATTATT | GCCGAGACAA | CGGCCTACTT  | CTTCACATTC | 880 |
| <i>P. sylvestris</i> (MT796488)  | 801 | TGACTACCTG | ACGGGAGGTT | TTACCGCAAA | TACTTCTTTG |   | GCTCATTATT | GCCGAGACAA | CGGCCTACTT  | CTTCACATTC | 880 |
|                                  |     |            |            |            |            |   |            |            |             |            |     |
| <i>P. densiflora</i> (JN854210)  | 881 | ACCGCGCGAT | GCATGCAGTT | ATTGACAGAC | AAAGAAATCA |   | TGGTATGCAT | TTCCGGGTAC | TGGCTAAAGC  | ATTGCGTATG | 960 |
| <i>P. densiflora</i> (JQ512574)  | 881 | ACCGCGCGAT | GCATGCAGTT | ATTGACAGAC | AAAGAAATCA |   | TGGTATGCAT | TTCCGGGTAC | TGGCTAAAGC  | ATTGCGTATG | 960 |
| <i>P. densiflora</i> (MF990371)  | 881 | ACCGCGCGAT | GCATGCAGTT | ATTGACAGAC | AAAGAAATCA |   | TGGTATGCAT | TTCCGGGTAC | TGGCTAAAGC  | ATTGCGTATG | 960 |
| <i>P. densiflora</i> (MT786135)  | 881 | ACCGCGCGAT | GCATGCAGTT | ATTGACAGAC | AAAGAAATCA |   | TGGTATGCAT | TTCCGGGTAC | TGGCTAAAGC  | ATTGCGTATG | 960 |
| <i>P. densiflora</i> (MZ677091)  | 881 | ACCGCGCGAT | GCATGCAGTT | ATTGACAGAC | AAAGAAATCA |   | TGGTATGCAT | TTCCGGGTAC | TGGCTAAAGC  | ATTGCGTATG | 960 |
| <i>P. densiflora</i> (NC_042394) | 881 | ACCGCGCGAT | GCATGCAGTT | ATTGACAGAC | AAAGAAATCA |   | TGGTATGCAT | TTCCGGGTAC | TGGCTAAAGC  | ATTGCGTATG | 960 |
| <i>P. densiflora</i> (NC_062639) | 881 | ACCGCGCGAT | GCATGCAGTT | ATTGACAGAC | AAAGAAATCA |   | TGGTATGCAT | TTCCGGGTAC | TGGCTAAAGC  | ATTGCGTATG | 960 |
| <i>P. densiflora</i> (NC_062640) | 881 | ACCGCGCGAT | GCATGCAGTT | ATTGACAGAC | AAAGAAATCA |   | TGGTATGCAT | TTCCGGGTAC | TGGCTAAAGC  | ATTGCGTATG | 960 |
| <i>P. sylvestris</i> (JN854158)  | 881 | ACCGCGCGAT | GCATGCAGTT | ATTGACAGAC | AAAGAAATCA |   | TGGTATGCAT | TTCCGGGTAC | TGGCTAAAGC  | ATTGCGTATG | 960 |
| <i>P. sylvestris</i> (KR476379)  | 881 | ACCGCGCGAT | GCATGCAGTT | ATTGACAGAC | AAAGAAATCA |   | TGGTATGCAT | TTCCGGGTAC | TGGCTAAAGC  | ATTGCGTATG | 960 |
| <i>P. sylvestris</i> (MT787466)  | 881 | ACCGCGCGAT | GCATGCAGTT | ATTGACAGAC | AAAGAAATCA |   | TGGTATGCAT | TTCCGGGTAC | TGGCTAAAGC  | ATTGCGTATG | 960 |
| <i>P. sylvestris</i> (MT796488)  | 881 | ACCGCGCGAT | GCATGCAGTT | ATTGACAGAC | AAAGAAATCA |   | TGGTATGCAT | TTCCGGGTAC | TGGCTAAAGC  | ATTGCGTATG | 960 |



|                                  |      |            |             |                     |            |                     |            |            |                     |      |
|----------------------------------|------|------------|-------------|---------------------|------------|---------------------|------------|------------|---------------------|------|
|                                  |      |            |             | *                   |            | *                   | *          | *          | *                   |      |
| <i>P. densiflora</i> (JN854210)  | 1201 | CAGTTTGGTG | GGGGAACCTTT | GGG <b>AC</b> ATCCT | TGGGGAAATG | CACCTGGTGC          | AGCAGCTAAT | CGGGTTGCTC | TAG <b>AAG</b> CTTG | 1280 |
| <i>P. densiflora</i> (JQ512574)  | 1201 | CAGTTTGGTG | GGGGAACCTTT | GGG <b>AC</b> ATCCT | TGGGGAAATG | CACCTGGTGC          | AGCAGCTAAT | CGGGTTGCTC | TAG <b>AAG</b> CTTG | 1280 |
| <i>P. densiflora</i> (MF990371)  | 1201 | CAGTTTGGTG | GGGGAACCTTT | GGG <b>AC</b> ATCCT | TGGGGAAATG | CACCTGGTGC          | AGCAGCTAAT | CGGGTTGCTC | TAG <b>AAG</b> CTTG | 1280 |
| <i>P. densiflora</i> (MT786135)  | 1201 | CAGTTTGGTG | GGGGAACCTTT | GGG <b>TC</b> ATCCT | TGGGGAAATG | CAC <b>CAG</b> GTGC | AGTAGCCAAT | CGGGTTGCTC | TAGGAGCTTG          | 1280 |
| <i>P. densiflora</i> (MZ677091)  | 1201 | CAGTTTGGTG | GGGGAACCTTT | GGG <b>AC</b> ATCCT | TGGGGAAATG | CACCTGGTGC          | AGTAGCTAAT | CGGGTTGCTC | TAG <b>AAG</b> CTTG | 1280 |
| <i>P. densiflora</i> (NC_042394) | 1201 | CAGTTTGGTG | GGGGAACCTTT | GGG <b>AC</b> ATCCT | TGGGGAAATG | CACCTGGTGC          | AGCAGCTAAT | CGGGTTGCTC | TAG <b>AAG</b> CTTG | 1280 |
| <i>P. densiflora</i> (NC_062639) | 1201 | CAGTTTGGTG | GGGGAACCTTT | GGG <b>AC</b> ATCCT | TGGGGAAATG | CACCTGGTGC          | AGTAGCTAAT | CGGGTTGCTC | TAG <b>AAG</b> CTTG | 1280 |
| <i>P. densiflora</i> (NC_062640) | 1201 | CAGTTTGGTG | GGGGAACCTTT | GGG <b>AC</b> ATCCT | TGGGGAAATG | CACCTGGTGC          | AGTAGCTAAT | CGGGTTGCTC | TAG <b>AAG</b> CTTG | 1280 |
| <i>P. sylvestris</i> (JN854158)  | 1201 | CAGTTTGGTG | GGGGAACCTTT | GGG <b>AC</b> ATCCT | TGGGGAAATG | CACCTGGTGC          | AGTAGCTAAT | CGGGTTGCTC | TAG <b>AAG</b> CTTG | 1280 |
| <i>P. sylvestris</i> (KR476379)  | 1201 | CAGTTTGGTG | GGGGAACCTTT | GGG <b>AC</b> ATCCT | TGGGGAAATG | CACCTGGTGC          | AGTAGCTAAT | CGGGTTGCTC | TAG <b>AAG</b> CTTG | 1280 |
| <i>P. sylvestris</i> (MT787466)  | 1201 | CAGTTTGGTG | GGGGAACCTTT | GGG <b>AC</b> ATCCT | TGGGGAAATG | CACCTGGTGC          | AGTAGCTAAT | CGGGTTGCTC | TAG <b>AAG</b> CTTG | 1280 |
| <i>P. sylvestris</i> (MT796488)  | 1201 | CAGTTTGGTG | GGGGAACCTTT | GGG <b>AC</b> ATCCT | TGGGGAAATG | CACCTGGTGC          | AGTAGCTAAT | CGGGTTGCTC | TAG <b>AAG</b> CTTG | 1280 |

|                                  |      |            |            |            |            |            |            |            |            |      |
|----------------------------------|------|------------|------------|------------|------------|------------|------------|------------|------------|------|
|                                  |      |            |            | *          |            |            |            |            |            |      |
| <i>P. densiflora</i> (JN854210)  | 1281 | TGTACAAGCT | CGTAATGAAG | GACGTGATCT | TGCTCGTGAA | GGTAATGAAG | TGATCCGTGA | AGCTTGTAAG | TGGAGTCCTG | 1360 |
| <i>P. densiflora</i> (JQ512574)  | 1281 | TGTACAAGCT | CGTAATGAAG | GACGTGATCT | TGCTCGTGAA | GGTAATGAAG | TGATCCGTGA | AGCTTGTAAG | TGGAGTCCTG | 1360 |
| <i>P. densiflora</i> (MF990371)  | 1281 | TGTACAAGCT | CGTAATGAAG | GACGTGATCT | TGCTCGTGAA | GGTAATGAAG | TGATCCGTGA | AGCTTGTAAG | TGGAGTCCTG | 1360 |
| <i>P. densiflora</i> (MT786135)  | 1281 | TGTACAAGCT | CGTAATGAAG | GATGTGATCT | TGCTCGTGAA | GGTAATGAAG | TGATCCGTGA | AGCTTGTAAG | TGGAGTCCTG | 1360 |
| <i>P. densiflora</i> (MZ677091)  | 1281 | TGTACAAGCT | CGTAATGAAG | GACGTGATCT | TGCTCGTGAA | GGTAATGAAG | TGATCCGTGA | AGCTTGTAAG | TGGAGTCCTG | 1360 |
| <i>P. densiflora</i> (NC_042394) | 1281 | TGTACAAGCT | CGTAATGAAG | GACGTGATCT | TGCTCGTGAA | GGTAATGAAG | TGATCCGTGA | AGCTTGTAAG | TGGAGTCCTG | 1360 |
| <i>P. densiflora</i> (NC_062639) | 1281 | TGTACAAGCT | CGTAATGAAG | GACGTGATCT | TGCTCGTGAA | GGTAATGAAG | TGATCCGTGA | AGCTTGTAAG | TGGAGTCCTG | 1360 |
| <i>P. densiflora</i> (NC_062640) | 1281 | TGTACAAGCT | CGTAATGAAG | GACGTGATCT | TGCTCGTGAA | GGTAATGAAG | TGATCCGTGA | AGCTTGTAAG | TGGAGTCCTG | 1360 |
| <i>P. sylvestris</i> (JN854158)  | 1281 | TGTACAAGCT | CGTAATGAAG | GACGTGATCT | TGCTCGTGAA | GGTAATGAAG | TGATCCGTGA | AGCTTGTAAG | TGGAGTCCTG | 1360 |
| <i>P. sylvestris</i> (KR476379)  | 1281 | TGTACAAGCT | CGTAATGAAG | GACGTGATCT | TGCTCGTGAA | GGTAATGAAG | TGATCCGTGA | AGCTTGTAAG | TGGAGTCCTG | 1360 |
| <i>P. sylvestris</i> (MT787466)  | 1281 | TGTACAAGCT | CGTAATGAAG | GACGTGATCT | TGCTCGTGAA | GGTAATGAAG | TGATCCGTGA | AGCTTGTAAG | TGGAGTCCTG | 1360 |
| <i>P. sylvestris</i> (MT796488)  | 1281 | TGTACAAGCT | CGTAATGAAG | GACGTGATCT | TGCTCGTGAA | GGTAATGAAG | TGATCCGTGA | AGCTTGTAAG | TGGAGTCCTG | 1360 |

|                                  |      |            |            |            |            |            |            |         |      |
|----------------------------------|------|------------|------------|------------|------------|------------|------------|---------|------|
| <i>P. densiflora</i> (JN854210)  | 1361 | AACTAGCTTC | TGCTTGTGAA | ATATGGAAGG | AGATCAAATT | TGAATTTGAT | GTGATTGATC | GCTTTAA | 1427 |
| <i>P. densiflora</i> (JQ512574)  | 1361 | AACTAGCTTC | TGCTTGTGAA | ATATGGAAGG | AGATCAAATT | TGAATTTGAT | GTGATTGATC | GCTTTAA | 1427 |
| <i>P. densiflora</i> (MF990371)  | 1361 | AACTAGCTTC | TGCTTGTGAA | ATATGGAAGG | AGATCAAATT | TGAATTTGAT | GTGATTGATC | GCTTTAA | 1427 |
| <i>P. densiflora</i> (MT786135)  | 1361 | AACTAGCTTC | TGCTTGTGAA | ATATGGAAGG | AGATCAAATT | TGAATTTGAT | GTGATTGATC | GCTTTAA | 1427 |
| <i>P. densiflora</i> (MZ677091)  | 1361 | AACTAGCTTC | TGCTTGTGAA | ATATGGAAGG | AGATCAAATT | TGAATTTGAT | GTGATTGATC | GCTTTAA | 1427 |
| <i>P. densiflora</i> (NC_042394) | 1361 | AACTAGCTTC | TGCTTGTGAA | ATATGGAAGG | AGATCAAATT | TGAATTTGAT | GTGATTGATC | GCTTTAA | 1427 |
| <i>P. densiflora</i> (NC_062639) | 1361 | AACTAGCTTC | TGCTTGTGAA | ATATGGAAGG | AGATCAAATT | TGAATTTGAT | GTGATTGATC | GCTTTAA | 1427 |
| <i>P. densiflora</i> (NC_062640) | 1361 | AACTAGCTTC | TGCTTGTGAA | ATATGGAAGG | AGATCAAATT | TGAATTTGAT | GTGATTGATC | GCTTTAA | 1427 |
| <i>P. sylvestris</i> (JN854158)  | 1361 | AACTAGCTTC | TGCTTGTGAA | ATATGGAAGG | AGATCAAATT | TGAATTTGAT | GTGATTGATC | GCTTTAA | 1427 |
| <i>P. sylvestris</i> (KR476379)  | 1361 | AACTAGCTTC | TGCTTGTGAA | ATATGGAAGG | AGATCAAATT | TGAATTTGAT | GTGATTGATC | GCTTTAA | 1427 |
| <i>P. sylvestris</i> (MT787466)  | 1361 | AACTAGCTTC | TGCTTGTGAA | ATATGGAAGG | AGATCAAATT | TGAATTTGAT | GTGATTGATC | GCTTTAA | 1427 |
| <i>P. sylvestris</i> (MT796488)  | 1361 | AACTAGCTTC | TGCTTGTGAA | ATATGGAAGG | AGATCAAATT | TGAATTTGAT | GTGATTGATC | GCTTTAA | 1427 |
