# Supplementary material
Source: MDPI journal article supplement (https://www.mdpi.com/1999-4907/14/6/1095)
Supplement: s1 [file s1]

# Supplementary Figure S1. Alignment of *rbcl* from *P. echinata* and *P. elliotii*

|                                |     |              |            |            |            |            |            |            |            |     |
|--------------------------------|-----|--------------|------------|------------|------------|------------|------------|------------|------------|-----|
| <i>P. echinata</i> (AY724754)  | 1   | TAGTGTCTCGGA | TTCAAAGCTG | GTGTTAAAGA | TTACAGATTA | ACTTATTATA | CTCCTGAATA | TCAGACCAAG | GATACAGATA | 80  |
| <i>P. echinata</i> (JN854204)  | 1   | TAGTGTCTCGGA | TTCAAAGCTG | GTGTTAAAGA | TTACAGATTA | ACTTATTATA | CTCCTGAATA | TCAGACCAAG | GATACAGATA | 80  |
| <i>P. echinata</i> (MZ424449)  | 1   | TAGTGTCTCGGA | TTCAAAGCTG | GTGTTAAAGA | TTACAGATTA | ACTTATTATA | CTCCTGAATA | TCAGACCAAG | GATACAGATA | 80  |
| <i>P. echinata</i> (NC_065458) | 1   | TAGTGTCTCGGA | TTCAAAGCTG | GTGTTAAAGA | TTACAGATTA | ACTTATTATA | CTCCTGAATA | TCAGACCAAG | GATACAGATA | 80  |
| <i>P. echinata</i> (AY947435)  | 1   | TAGTGTCTCGGA | TTCAAAGCTG | GTGTTAAAGA | TTACAGATTA | ACTTATTATA | CTCCTGAATA | TCAGACCAAG | GATACAGATA | 80  |
| <i>P. elliotii</i> (AY724755)  | 1   | TAGTGTCTCGGA | TTCAAAGCTG | GTGTTAAAGA | TTACAGATTA | ACTTATTATA | CTCCTGAATA | TCAGACCAAG | GATACAGATA | 80  |
| <i>P. elliotii</i> (JN854202)  | 1   | TAGTGTCTCGGA | TTCAAAGCTG | GTGTTAAAGA | TTACAGATTA | ACTTATTATA | CTCCTGAATA | TCAGACCAAG | GATACAGATA | 80  |
| <i>P. elliotii</i> (NC_042788) | 1   | TAGTGTCTCGGA | TTCAAAGCTG | GTGTTAAAGA | TTACAGATTA | ACTTATTATA | CTCCTGAATA | TCAGACCAAG | GATACAGATA | 80  |
|                                |     |              |            |            |            |            |            |            |            |     |
| <i>P. echinata</i> (AY724754)  | 81  | TCTTGGCAGC   | ATTCCGAGTA | ACTCCTCAAC | CCGGGGTGCC | ACCTGAAGAA | GCGGGAGCAG | CAGTAGCTGC | TGAATCTTCC | 160 |
| <i>P. echinata</i> (JN854204)  | 81  | TCTTGGCAGC   | ATTCCGAGTA | ACTCCTCAAC | CCGGGGTGCC | ACCTGAAGAA | GCGGGAGCAG | CAGTAGCTGC | TGAATCTTCC | 160 |
| <i>P. echinata</i> (MZ424449)  | 81  | TCTTGGCAGC   | ATTCCGAGTA | ACTCCTCAAC | CCGGGGTGCC | ACCTGAAGAA | GCGGGAGCAG | CAGTAGCTGC | TGAATCTTCC | 160 |
| <i>P. echinata</i> (NC_065458) | 81  | TCTTGGCAGC   | ATTCCGAGTA | ACTCCTCAAC | CCGGGGTGCC | ACCTGAAGAA | GCGGGAGCAG | CAGTAGCTGC | TGAATCTTCC | 160 |
| <i>P. echinata</i> (AY947435)  | 81  | TCTTGGCAGC   | ATTCCGAGTA | ACTCCTCAAC | CCGGGGTGCC | ACCTGAAGAA | GCGGGAGCAG | CAGTAGCTGC | TGAATCTTCC | 160 |
| <i>P. elliotii</i> (AY724755)  | 81  | TCTTGGCAGC   | ATTCCGAGTA | ACTCCTCAAC | CCGGGGTGCC | ACCTGAAGAA | GCGGGAGCAG | CAGTAGCTGC | TGAATCTTCC | 160 |
| <i>P. elliotii</i> (JN854202)  | 81  | TCTTGGCAGC   | ATTCCGAGTA | ACTCCTCAAC | CCGGGGTGCC | ACCTGAAGAA | GCGGGAGCAG | CAGTAGCTGC | TGAATCTTCC | 160 |
| <i>P. elliotii</i> (NC_042788) | 81  | TCTTGGCAGC   | ATTCCGAGTA | ACTCCTCAAC | CCGGGGTGCC | ACCTGAAGAA | GCGGGAGCAG | CAGTAGCTGC | TGAATCTTCC | 160 |
|                                |     |              |            |            |            |            |            |            |            |     |
| <i>P. echinata</i> (AY724754)  | 161 | ACCGGTACAT   | GGACCACTGT | TTGGACCGAT | GGACTTACTA | GTCTCGATCG | TTACAAGGGG | CGATGCTATG | ATATCGAGCC | 240 |
| <i>P. echinata</i> (JN854204)  | 161 | ACCGGTACAT   | GGACCACTGT | TTGGACCGAT | GGACTTACTA | GTCTCGATCG | TTACAAGGGG | CGATGCTATG | ATATCGAGCC | 240 |
| <i>P. echinata</i> (MZ424449)  | 161 | ACCGGTACAT   | GGACCACTGT | TTGGACCGAT | GGACTTACTA | GTCTCGATCG | TTACAAGGGG | CGATGCTATG | ATATCGAGCC | 240 |
| <i>P. echinata</i> (NC_065458) | 161 | ACCGGTACAT   | GGACCACTGT | TTGGACCGAT | GGACTTACTA | GTCTCGATCG | TTACAAGGGG | CGATGCTATG | ATATCGAGCC | 240 |
| <i>P. echinata</i> (AY947435)  | 161 | ACCGGTACAT   | GGACCACTGT | TTGGACCGAT | GGACTTACTA | GTCTCGATCG | TTACAAGGGG | CGATGCTATG | ATATCGAGCC | 240 |
| <i>P. elliotii</i> (AY724755)  | 161 | ACCGGTACAT   | GGACCACTGT | TTGGACCGAT | GGACTTACTA | GTCTCGATCG | TTACAAGGGG | CGATGCTATG | ATATCGAGCC | 240 |
| <i>P. elliotii</i> (JN854202)  | 161 | ACCGGTACAT   | GGACCACTGT | TTGGACCGAT | GGACTTACTA | GTCTCGATCG | TTACAAGGGG | CGATGCTATG | ATATCGAGCC | 240 |
| <i>P. elliotii</i> (NC_042788) | 161 | ACCGGTACAT   | GGACCACTGT | TTGGACCGAT | GGACTTACTA | GTCTCGATCG | TTACAAGGGG | CGATGCTATG | ATATCGAGCC | 240 |
|                                |     |              |            |            |            |            |            |            |            |     |
| <i>P. echinata</i> (AY724754)  | 241 | CGTTCCTGGA   | GAGGAGACTC | AATTTATTGC | CTATGTAGCT | TACCCCTTAG | ACCTTTTCGA | AGAAGGTTCT | GTTACTAACT | 320 |
| <i>P. echinata</i> (JN854204)  | 241 | CGTTCCTGGA   | GAGGAGACTC | AATTTATTGC | CTATGTAGCT | TACCCCTTAG | ACCTTTTCGA | AGAAGGTTCT | GTTACTAACT | 320 |
| <i>P. echinata</i> (MZ424449)  | 241 | CGTTCCTGGA   | GAGGAGACTC | AATTTATTGC | CTATGTAGCT | TACCCCTTAG | ACCTTTTCGA | AGAAGGTTCT | GTTACTAACT | 320 |
| <i>P. echinata</i> (NC_065458) | 241 | CGTTCCTGGA   | GAGGAGACTC | AATTTATTGC | CTATGTAGCT | TACCCCTTAG | ACCTTTTCGA | AGAAGGTTCT | GTTACTAACT | 320 |
| <i>P. echinata</i> (AY947435)  | 241 | CGTTCCTGGA   | GAGGAGACTC | AATTTATTGC | CTATGTAGCT | TACCCCTTAG | ACCTTTTCGA | AGAAGGTTCT | GTTACTAACT | 320 |
| <i>P. elliotii</i> (AY724755)  | 241 | CGTTCCTGGA   | GAGGAGACTC | AATTTATTGC | CTATGTAGCT | TACCCCTTAG | ACCTTTTCGA | AGAAGGTTCT | GTTACTAACT | 320 |
| <i>P. elliotii</i> (JN854202)  | 241 | CGTTCCTGGA   | GAGGAGACTC | AATTTATTGC | CTATGTAGCT | TACCCCTTAG | ACCTTTTCGA | AGAAGGTTCT | GTTACTAACT | 320 |
| <i>P. elliotii</i> (NC_042788) | 241 | CGTTCCTGGA   | GAGGAGACTC | AATTTATTGC | CTATGTAGCT | TACCCCTTAG | ACCTTTTCGA | AGAAGGTTCT | GTTACTAACT | 320 |
|                                |     |              |            |            |            |            |            |            |            |     |
| <i>P. echinata</i> (AY724754)  | 321 | TGTTCACTTC   | CATTGTAGGT | AATGTATTTG | GATTCAAGGC | CCTACGGGCT | CTACGTTTGG | AAGATTTGCG | GATTCCCCCT | 400 |
| <i>P. echinata</i> (JN854204)  | 321 | TGTTCACTTC   | CATTGTAGGT | AATGTATTTG | GATTCAAGGC | CCTACGGGCT | CTACGTTTGG | AAGATTTGCG | GATTCCCCCT | 400 |
| <i>P. echinata</i> (MZ424449)  | 321 | TGTTCACTTC   | CATTGTAGGT | AATGTATTTG | GATTCAAGGC | CCTACGGGCT | CTACGTTTGG | AAGATTTGCG | GATTCCCCCT | 400 |
| <i>P. echinata</i> (NC_065458) | 321 | TGTTCACTTC   | CATTGTAGGT | AATGTATTTG | GATTCAAGGC | CCTACGGGCT | CTACGTTTGG | AAGATTTGCG | GATTCCCCCT | 400 |
| <i>P. echinata</i> (AY947435)  | 321 | TGTTCACTTC   | CATTGTAGGT | AATGTATTTG | GATTCAAGGC | CCTACGGGCT | CTACGTTTGG | AAGATTTGCG | GATTCCCCCT | 400 |
| <i>P. elliotii</i> (AY724755)  | 321 | TGTTCACTTC   | CATTGTAGGT | AATGTATTTG | GATTCAAGGC | CCTACGGGCT | CTACGTTTGG | AAGATTTGCG | GATTCCCCCT | 400 |
| <i>P. elliotii</i> (JN854202)  | 321 | TGTTCACTTC   | CATTGTAGGT | AATGTATTTG | GATTCAAGGC | CCTACGGGCT | CTACGTTTGG | AAGATTTGCG | GATTCCCCCT | 400 |
| <i>P. elliotii</i> (NC_042788) | 321 | TGTTCACTTC   | CATTGTAGGT | AATGTATTTG | GATTCAAGGC | CCTACGGGCT | CTACGTTTGG | AAGATTTGCG | GATTCCCCCT | 400 |

|                                  |     |            |            |            |            |            |            |            |            |     |
|----------------------------------|-----|------------|------------|------------|------------|------------|------------|------------|------------|-----|
| <i>P. echinata</i> (AY724754)    | 401 | GCTTATTCCA | AAACTTTTCA | GGGTCCACCT | CATGGTATCC | AGGTTGAAAG | AGATAAATTG | AACAAATATG | GTCGTCCTTT | 480 |
| <i>P. echinata</i> (JN854204)    | 401 | GCTTATTCCA | AAACTTTTCA | GGGTCCACCT | CATGGTATCC | AGGTTGAAAG | AGATAAATTG | AACAAATATG | GTCGTCCTTT | 480 |
| <i>P. echinata</i> (MZ424449)    | 401 | GCTTATTCCA | AAACTTTTCA | GGGTCCACCT | CATGGTATCC | AGGTTGAAAG | AGATAAATTG | AACAAATATG | GTCGTCCTTT | 480 |
| <i>P. echinata</i> (NC_065458)   | 401 | GCTTATTCCA | AAACTTTTCA | GGGTCCACCT | CATGGTATCC | AGGTTGAAAG | AGATAAATTG | AACAAATATG | GTCGTCCTTT | 480 |
| <i>P. echinata</i> (AY947435)    | 401 | GCTTATTCCA | AAACTTTTCA | GGGTCCACCT | CATGGTATCC | AGGTTGAAAG | AGATAAATTG | AACAAATATG | GTCGTCCTTT | 480 |
| <i>P. elliotitii</i> (AY724755)  | 401 | GCTTATTCCA | AAACTTTTCA | GGGTCCACCT | CATGGTATCC | AGGTTGAAAG | AGATAAATTG | AACAAATATG | GTCGTCCTTT | 480 |
| <i>P. elliotitii</i> (JN854202)  | 401 | GCTTATTCCA | AAACTTTTCA | GGGTCCACCT | CATGGTATCC | AGGTTGAAAG | AGATAAATTG | AACAAATATG | GTCGTCCTTT | 480 |
| <i>P. elliotitii</i> (NC_042788) | 401 | GCTTATTCCA | AAACTTTTCA | GGGTCCACCT | CATGGTATCC | AGGTTGAAAG | AGATAAATTG | AACAAATATG | GTCGTCCTTT | 480 |

|                                  |     |            |            |            |            |            |            |            |            |     |
|----------------------------------|-----|------------|------------|------------|------------|------------|------------|------------|------------|-----|
| <i>P. echinata</i> (AY724754)    | 481 | ATTGGGATGT | ACTATCAAAC | CAAAATTGGG | TCTATCAGCC | AAAAACTATG | GTAGAGCAGT | TTACGAATGT | CTCCGTGGTG | 560 |
| <i>P. echinata</i> (JN854204)    | 481 | ATTGGGATGT | ACTATCAAAC | CAAAATTGGG | TCTATCAGCC | AAAAACTATG | GTAGAGCAGT | TTACGAATGT | CTCCGTGGTG | 560 |
| <i>P. echinata</i> (MZ424449)    | 481 | ATTGGGATGT | ACTATCAAAC | CAAAATTGGG | TCTATCAGCC | AAAAACTATG | GTAGAGCAGT | TTACGAATGT | CTCCGTGGTG | 560 |
| <i>P. echinata</i> (NC_065458)   | 481 | ATTGGGATGT | ACTATCAAAC | CAAAATTGGG | TCTATCAGCC | AAAAACTATG | GTAGAGCAGT | TTACGAATGT | CTCCGTGGTG | 560 |
| <i>P. echinata</i> (AY947435)    | 481 | ATTGGGATGT | ACTATCAAAC | CAAAATTGGG | TCTATCAGCC | AAAAACTATG | GTAGAGCAGT | TTACGAATGT | CTCCGTGGTG | 560 |
| <i>P. elliotitii</i> (AY724755)  | 481 | ATTGGGATGT | ACTATCAAAC | CAAAATTGGG | TCTATCAGCC | AAAAACTATG | GTAGAGCAGT | TTACGAATGT | CTCCGTGGTG | 560 |
| <i>P. elliotitii</i> (JN854202)  | 481 | ATTGGGATGT | ACTATCAAAC | CAAAATTGGG | TCTATCAGCC | AAAAACTATG | GTAGAGCAGT | TTACGAATGT | CTCCGTGGTG | 560 |
| <i>P. elliotitii</i> (NC_042788) | 481 | ATTGGGATGT | ACTATCAAAC | CAAAATTGGG | TCTATCAGCC | AAAAACTATG | GTAGAGCAGT | TTACGAATGT | CTCCGTGGTG | 560 |

|                                  |     |            |            |            |            |             |            |            |            |     |
|----------------------------------|-----|------------|------------|------------|------------|-------------|------------|------------|------------|-----|
| <i>P. echinata</i> (AY724754)    | 561 | GACTCGATTT | TACTAAGGAT | GATGAGAACG | TAAATTCCCA | ACCATTTCATG | CGCTGGAGAG | ATCGTTTTGT | CTTTTGTGCG | 640 |
| <i>P. echinata</i> (JN854204)    | 561 | GACTCGATTT | TACTAAGGAT | GATGAGAACG | TAAATTCCCA | ACCATTTCATG | CGCTGGAGAG | ATCGTTTTGT | CTTTTGTGCG | 640 |
| <i>P. echinata</i> (MZ424449)    | 561 | GACTCGATTT | TACTAAGGAT | GATGAGAACG | TAAATTCCCA | ACCATTTCATG | CGCTGGAGAG | ATCGTTTTGT | CTTTTGTGCG | 640 |
| <i>P. echinata</i> (NC_065458)   | 561 | GACTCGATTT | TACTAAGGAT | GATGAGAACG | TAAATTCCCA | ACCATTTCATG | CGCTGGAGAG | ATCGTTTTGT | CTTTTGTGCG | 640 |
| <i>P. echinata</i> (AY947435)    | 561 | GACTCGATTT | TACTAAGGAT | GATGAGAACG | TAAATTCCCA | ACCATTTCATG | CGCTGGAGAG | ATCGTTTTGT | CTTTTGTGCG | 640 |
| <i>P. elliotitii</i> (AY724755)  | 561 | GACTCGATTT | TACTAAGGAT | GATGAGAACG | TAAATTCCCA | ACCATTTCATG | CGCTGGAGAG | ATCGTTTTGT | CTTTTGTGCG | 640 |
| <i>P. elliotitii</i> (JN854202)  | 561 | GACTCGATTT | TACTAAGGAT | GATGAGAACG | TAAATTCCCA | ACCATTTCATG | CGCTGGAGAG | ATCGTTTTGT | CTTTTGTGCG | 640 |
| <i>P. elliotitii</i> (NC_042788) | 561 | GACTCGATTT | TACTAAGGAT | GATGAGAACG | TAAATTCCCA | ACCATTTCATG | CGCTGGAGAG | ATCGTTTTGT | CTTTTGTGCG | 640 |

|                                  |     |            |            |            |            |            |            |            |            |     |
|----------------------------------|-----|------------|------------|------------|------------|------------|------------|------------|------------|-----|
| <i>P. echinata</i> (AY724754)    | 641 | GAAGCAATTT | ATAAGGCTCA | GGCTGAGACG | GGTGAAATTA | AGGGACATTA | TTTGAATGCT | ACTGCAGGTA | CATGTGAAGA | 720 |
| <i>P. echinata</i> (JN854204)    | 641 | GAAGCAATTT | ATAAGGCTCA | GGCTGAGACG | GGTGAAATTA | AGGGACATTA | TTTGAATGCT | ACTGCAGGTA | CATGTGAAGA | 720 |
| <i>P. echinata</i> (MZ424449)    | 641 | GAAGCAATTT | ATAAGGCTCA | GGCTGAGACG | GGTGAAATTA | AGGGACATTA | TTTGAATGCT | ACTGCAGGTA | CATGTGAAGA | 720 |
| <i>P. echinata</i> (NC_065458)   | 641 | GAAGCAATTT | ATAAGGCTCA | GGCTGAGACG | GGTGAAATTA | AGGGACATTA | TTTGAATGCT | ACTGCAGGTA | CATGTGAAGA | 720 |
| <i>P. echinata</i> (AY947435)    | 641 | GAAGCAATTT | ATAAGGCTCA | GGCTGAGACG | GGTGAAATTA | AGGGACATTA | TTTGAATGCT | ACTGCAGGTA | CATGTGAAGA | 720 |
| <i>P. elliotitii</i> (AY724755)  | 641 | GAAGCAATTT | ATAAGGCTCA | GGCTGAGACG | GGTGAAATTA | AGGGACATTA | TTTGAATGCT | ACTGCAGGTA | CATGTGAAGA | 720 |
| <i>P. elliotitii</i> (JN854202)  | 641 | GAAGCAATTT | ATAAGGCTCA | GGCTGAGACG | GGTGAAATTA | AGGGACATTA | TTTGAATGCT | ACTGCAGGTA | CATGTGAAGA | 720 |
| <i>P. elliotitii</i> (NC_042788) | 641 | GAAGCAATTT | ATAAGGCTCA | GGCTGAGACG | GGTGAAATTA | AGGGACATTA | TTTGAATGCT | ACTGCAGGTA | CATGTGAAGA | 720 |

|                                  |     |            |            |            |            |            |            |            |            |     |
|----------------------------------|-----|------------|------------|------------|------------|------------|------------|------------|------------|-----|
| <i>P. echinata</i> (AY724754)    | 721 | AATGATGAAA | AGGGTAATAT | TTGCAAGAGA | ATTGGGAGTT | CCTATCGTTA | TGCATGACTA | TCTGACGGGA | GGTTTTACCG | 800 |
| <i>P. echinata</i> (JN854204)    | 721 | AATGATGAAA | AGGGTAATAT | TTGCAAGAGA | ATTGGGAGTT | CCTATCGTTA | TGCATGACTA | TCTGACGGGA | GGTTTTACCG | 800 |
| <i>P. echinata</i> (MZ424449)    | 721 | AATGATGAAA | AGGGTAATAT | TTGCAAGAGA | ATTGGGAGTT | CCTATCGTTA | TGCATGACTA | TCTGACGGGA | GGTTTTACCG | 800 |
| <i>P. echinata</i> (NC_065458)   | 721 | AATGATGAAA | AGGGTAATAT | TTGCAAGAGA | ATTGGGAGTT | CCTATCGTTA | TGCATGACTA | TCTGACGGGA | GGTTTTACCG | 800 |
| <i>P. echinata</i> (AY947435)    | 721 | AATGATGAAA | AGGGTAATAT | TTGCAAGAGA | ATTGGGAGTT | CCTATCGTTA | TGCATGACTA | TCTGACGGGA | GGTTTTACCG | 800 |
| <i>P. elliotitii</i> (AY724755)  | 721 | AATGATGAAA | AGGGTAATAT | TTGCAAGAGA | ATTGGGAGTT | CCTATCGTTA | TGCATGACTA | TCTGACGGGA | GGTTTTACCG | 800 |
| <i>P. elliotitii</i> (JN854202)  | 721 | AATGATGAAA | AGGGTAATAT | TTGCAAGAGA | ATTGGGAGTT | CCTATCGTTA | TGCATGACTA | TCTGACGGGA | GGTTTTACCG | 800 |
| <i>P. elliotitii</i> (NC_042788) | 721 | AATGATGAAA | AGGGTAATAT | TTGCAAGAGA | ATTGGGAGTT | CCTATCGTTA | TGCATGACTA | TCTGACGGGA | GGTTTTACCG | 800 |

|                                |     |            |            |            |            |            |            |            |            |     |
|--------------------------------|-----|------------|------------|------------|------------|------------|------------|------------|------------|-----|
| <i>P. echinata</i> (AY724754)  | 801 | CAAATACTTC | TTTGGCTCAT | TATTGCCGAG | ACAACGGCCT | ACTTCTTCAC | ATTCACCGCG | CGATGCATGC | AGTTATTGAC | 880 |
| <i>P. echinata</i> (JN854204)  | 801 | CAAATACTTC | TTTGGCTCAT | TATTGCCGAG | ACAACGGCCT | ACTTCTTCAC | ATTCACCGCG | CGATGCATGC | AGTTATTGAC | 880 |
| <i>P. echinata</i> (MZ424449)  | 801 | CAAATACTTC | TTTGGCTCAT | TATTGCCGAG | ACAACGGCCT | ACTTCTTCAC | ATTCACCGCG | CGATGCATGC | AGTTATTGAC | 880 |
| <i>P. echinata</i> (NC_065458) | 801 | CAAATACTTC | TTTGGCTCAT | TATTGCCGAG | ACAACGGCCT | ACTTCTTCAC | ATTCACCGCG | CGATGCATGC | AGTTATTGAC | 880 |
| <i>P. echinata</i> (AY947435)  | 801 | CAAATACTTC | TTTGGCTCAT | TATTGCCGAG | ACAACGGCCT | ACTTCTTCAC | ATTCACCGCG | CGATGCATGC | AGTTATTGAC | 880 |
| <i>P. elliotii</i> (AY724755)  | 801 | CAAATACTTC | TTTGGCTCAT | TATTGCCGAG | ACAACGGCCT | ACTTCTTCAC | ATTCACCGCG | CGATGCATGC | AGTTATTGAC | 880 |
| <i>P. elliotii</i> (JN854202)  | 801 | CAAATACTTC | TTTGGCTCAT | TATTGCCGAG | ACAACGGCCT | ACTTCTTCAC | ATTCACCGCG | CGATGCATGC | AGTTATTGAC | 880 |
| <i>P. elliotii</i> (NC_042788) | 801 | CAAATACTTC | TTTGGCTCAT | TATTGCCGAG | ACAACGGCCT | ACTTCTTCAC | ATTCACCGCG | CGATGCATGC | AGTTATTGAC | 880 |

|                                |     |            |            |            |            |            |            |            |            |     |
|--------------------------------|-----|------------|------------|------------|------------|------------|------------|------------|------------|-----|
| <i>P. echinata</i> (AY724754)  | 881 | AGACAAAGAA | TTCATGGTAT | GCATTTCCGG | GTACTGGCTA | AAGCATTGCG | TATGTCCGGT | GGAGATCATA | TTCACGCCGG | 960 |
| <i>P. echinata</i> (JN854204)  | 881 | AGACAAAGAA | TTCATGGTAT | GCATTTCCGG | GTACTGGCTA | AAGCATTGCG | TATGTCCGGT | GGAGATCATA | TTCACGCCGG | 960 |
| <i>P. echinata</i> (MZ424449)  | 881 | AGACAAAGAA | TTCATGGTAT | GCATTTCCGG | GTACTGGCTA | AAGCATTGCG | TATGTCCGGT | GGAGATCATA | TTCACGCCGG | 960 |
| <i>P. echinata</i> (NC_065458) | 881 | AGACAAAGAA | TTCATGGTAT | GCATTTCCGG | GTACTGGCTA | AAGCATTGCG | TATGTCCGGT | GGAGATCATA | TTCACGCCGG | 960 |
| <i>P. echinata</i> (AY947435)  | 881 | AGACAAAGAA | TTCATGGTAT | GCATTTCCGG | GTACTGGCTA | AAGCATTGCG | TATGTCCGGT | GGAGATCATA | TTCACGCCGG | 960 |
| <i>P. elliotii</i> (AY724755)  | 881 | AGACAAAGAA | TTCATGGTAT | GCATTTCCGG | GTACTGGCTA | AAGCATTGCG | TATGTCCGGT | GGAGATCATA | TTCACGCCGG | 960 |
| <i>P. elliotii</i> (JN854202)  | 881 | AGACAAAGAA | TTCATGGTAT | GCATTTCCGG | GTACTGGCTA | AAGCATTGCG | TATGTCCGGT | GGAGATCATA | TTCACGCCGG | 960 |
| <i>P. elliotii</i> (NC_042788) | 881 | AGACAAAGAA | TTCATGGTAT | GCATTTCCGG | GTACTGGCTA | AAGCATTGCG | TATGTCCGGT | GGAGATCATA | TTCACGCCGG | 960 |

|                                |     |            |            |            |           |            |            |            |            |      |
|--------------------------------|-----|------------|------------|------------|-----------|------------|------------|------------|------------|------|
| <i>P. echinata</i> (AY724754)  | 961 | TACTGTAGTA | GGTAAACTTG | AAGGGGAACG | AGACGTAAC | TTAGGGTTTG | TTGATCTACT | GCGTGATGAT | TTTATCGAAA | 1040 |
| <i>P. echinata</i> (JN854204)  | 961 | TACTGTAGTA | GGTAAACTTG | AAGGGGAACG | AGACGTAAC | TTAGGGTTTG | TTGATCTACT | GCGTGATGAT | TTTATCGAAA | 1040 |
| <i>P. echinata</i> (MZ424449)  | 961 | TACTGTAGTA | GGTAAACTTG | AAGGGGAACG | AGACGTAAC | TTAGGGTTTG | TTGATCTACT | GCGTGATGAT | TTTATCGAAA | 1040 |
| <i>P. echinata</i> (NC_065458) | 961 | TACTGTAGTA | GGTAAACTTG | AAGGGGAACG | AGACGTAAC | TTAGGGTTTG | TTGATCTACT | GCGTGATGAT | TTTATCGAAA | 1040 |
| <i>P. echinata</i> (AY947435)  | 961 | TACTGTAGTA | GGTAAACTTG | AAGGGGAACG | AGACGTAAC | TTAGGGTTTG | TTGATCTACT | GCGTGATGAT | TTTATCGAAA | 1040 |
| <i>P. elliotii</i> (AY724755)  | 961 | TACTGTAGTA | GGTAAACTTG | AAGGGGAACG | AGACGTAAC | TTAGGGTTTG | TTGATCTACT | GCGTGATGAT | TTTATCGAAA | 1040 |
| <i>P. elliotii</i> (JN854202)  | 961 | TACTGTAGTA | GGTAAACTTG | AAGGGGAACG | AGACGTAAC | TTAGGGTTTG | TTGATCTACT | GCGTGATGAT | TTTATCGAAA | 1040 |
| <i>P. elliotii</i> (NC_042788) | 961 | TACTGTAGTA | GGTAAACTTG | AAGGGGAACG | AGACGTAAC | TTAGGGTTTG | TTGATCTACT | GCGTGATGAT | TTTATCGAAA | 1040 |

|                                |      |            |            |            |            |            |            |            |            |      |
|--------------------------------|------|------------|------------|------------|------------|------------|------------|------------|------------|------|
| <i>P. echinata</i> (AY724754)  | 1041 | AAGATCGAAG | TCGTGGTATT | TACTTCACTC | AAGATTGGGT | ATCTATGCCA | GGTGTCTGCC | CGTAGCTTCA | GGAGGTATTC | 1120 |
| <i>P. echinata</i> (JN854204)  | 1041 | AAGATCGAAG | TCGTGGTATT | TACTTCACTC | AAGATTGGGT | ATCTATGCCA | GGTGTCTGCC | CGTAGCTTCA | GGAGGTATTC | 1120 |
| <i>P. echinata</i> (MZ424449)  | 1041 | AAGATCGAAG | TCGTGGTATT | TACTTCACTC | AAGATTGGGT | ATCTATGCCA | GGTGTCTGCC | CGTAGCTTCA | GGAGGTATTC | 1120 |
| <i>P. echinata</i> (NC_065458) | 1041 | AAGATCGAAG | TCGTGGTATT | TACTTCACTC | AAGATTGGGT | ATCTATGCCA | GGTGTCTGCC | CGTAGCTTCA | GGAGGTATTC | 1120 |
| <i>P. echinata</i> (AY947435)  | 1041 | AAGATCGAAG | TCGTGGTATT | TACTTCACTC | AAGATTGGGT | ATCTATGCCA | GGTGTCTGCC | CGTAGCTTCA | GGAGGTATTC | 1120 |
| <i>P. elliotii</i> (AY724755)  | 1041 | AAGATCGAAG | TCGTGGTATT | TACTTCACTC | AAGATTGGGT | ATCTATGCCA | GGTGTCTGCC | CGTAGCTTCA | GGAGGTATTC | 1120 |
| <i>P. elliotii</i> (JN854202)  | 1041 | AAGATCGAAG | TCGTGGTATT | TACTTCACTC | AAGATTGGGT | ATCTATGCCA | GGTGTCTGCC | CGTAGCTTCA | GGAGGTATTC | 1120 |
| <i>P. elliotii</i> (NC_042788) | 1041 | AAGATCGAAG | TCGTGGTATT | TACTTCACTC | AAGATTGGGT | ATCTATGCCA | GGTGTCTGCC | CGTAGCTTCA | GGAGGTATTC | 1120 |

|                                |      |            |            |            |            |            |            |            |            |      |
|--------------------------------|------|------------|------------|------------|------------|------------|------------|------------|------------|------|
| <i>P. echinata</i> (AY724754)  | 1121 | ACGTTTGGCA | TATGCCTGCT | CTGACCGAGA | TCTTTGGGGA | TGATTCCGTA | CTACAGTTTG | GTGGGGGAAC | TTTGGGACAT | 1200 |
| <i>P. echinata</i> (JN854204)  | 1121 | ACGTTTGGCA | TATGCCTGCT | CTGACCGAGA | TCTTTGGGGA | TGATTCCGTA | CTACAGTTTG | GTGGGGGAAC | TTTGGGACAT | 1200 |
| <i>P. echinata</i> (MZ424449)  | 1121 | ACGTTTGGCA | TATGCCTGCT | CTGACCGAGA | TCTTTGGGGA | TGATTCCGTA | CTACAGTTTG | GTGGGGGAAC | TTTGGGACAT | 1200 |
| <i>P. echinata</i> (NC_065458) | 1121 | ACGTTTGGCA | TATGCCTGCT | CTGACCGAGA | TCTTTGGGGA | TGATTCCGTA | CTACAGTTTG | GTGGGGGAAC | TTTGGGACAT | 1200 |
| <i>P. echinata</i> (AY947435)  | 1121 | ACGTTTGGCA | TATGCCTGCT | CTGACCGAGA | TCTTTGGGGA | TGATTCCGTA | CTACAGTTTG | GTGGGGGAAC | TTTGGGACAT | 1200 |
| <i>P. elliotii</i> (AY724755)  | 1121 | ACGTTTGGCA | TATGCCTGCT | CTGACCGAGA | TCTTTGGGGA | TGATTCCGTA | CTACAGTTTG | GTGGGGGAAC | TTTGGGACAT | 1200 |
| <i>P. elliotii</i> (JN854202)  | 1121 | ACGTTTGGCA | TATGCCTGCT | CTGACCGAGA | TCTTTGGGGA | TGATTCCGTA | CTACAGTTTG | GTGGGGGAAC | TTTGGGACAT | 1200 |
| <i>P. elliotii</i> (NC_042788) | 1121 | ACGTTTGGCA | TATGCCTGCT | CTGACCGAGA | TCTTTGGGGA | TGATTCCGTA | CTACAGTTTG | GTGGGGGAAC | TTTGGGACAT | 1200 |

|                                |      |            |            |            |            |            |            |            |            |      |
|--------------------------------|------|------------|------------|------------|------------|------------|------------|------------|------------|------|
| <i>P. echinata</i> (AY724754)  | 1201 | CCTTGGGGAA | ATGCACCTGG | TGCAGTAGCT | AATCGGGTTG | CTCTAGAAGC | TTGTGTACAA | GCTCGTAATG | AAGGACGTGA | 1280 |
| <i>P. echinata</i> (JN854204)  | 1201 | CCTTGGGGAA | ATGCACCTGG | TGCAGTAGCT | AATCGGGTTG | CTCTAGAAGC | TTGTGTACAA | GCTCGTAATG | AAGGACGTGA | 1280 |
| <i>P. echinata</i> (MZ424449)  | 1201 | CCTTGGGGAA | ATGCACCTGG | TGCAGTAGCT | AATCGGGTTG | CTCTAGAAGC | TTGTGTACAA | GCTCGTAATG | AAGGACGTGA | 1280 |
| <i>P. echinata</i> (NC_065458) | 1201 | CCTTGGGGAA | ATGCACCTGG | TGCAGTAGCT | AATCGGGTTG | CTCTAGAAGC | TTGTGTACAA | GCTCGTAATG | AAGGACGTGA | 1280 |
| <i>P. echinata</i> (AY947435)  | 1201 | CCTTGGGGAA | ATGCACCTGG | TGCAGTAGCT | AATCGGGTTG | CTCTAGAAGC | TTGTGTACAA | GCTCGTAATG | AAGGACGTGA | 1280 |
| <i>P. elliotii</i> (AY724755)  | 1201 | CCTTGGGGAA | ATGCACCTGG | TGCAGTAGCT | AATCGGGTTG | CTCTAGAAGC | TTGTGTACAA | GCTCGTAATG | AAGGACGTGA | 1280 |
| <i>P. elliotii</i> (JN854202)  | 1201 | CCTTGGGGAA | ATGCACCTGG | TGCAGTAGCT | AATCGGGTTG | CTCTAGAAGC | TTGTGTACAA | GCTCGTAATG | AAGGACGTGA | 1280 |
| <i>P. elliotii</i> (NC_042788) | 1201 | CCTTGGGGAA | ATGCACCTGG | TGCAGTAGCT | AATCGGGTTG | CTCTAGAAGC | TTGTGTACAA | GCTCGTAATG | AAGGACGTGA | 1280 |

|                                |      |            |            |            |            |       |      |
|--------------------------------|------|------------|------------|------------|------------|-------|------|
| <i>P. echinata</i> (AY724754)  | 1281 | TCTTGCTCGT | GAAGGTAATG | AAGTGATCCG | TGAAGCAGCT | AAATG | 1325 |
| <i>P. echinata</i> (JN854204)  | 1281 | TCTTGCTCGT | GAAGGTAATG | AAGTGATCCG | TGAAGCAGCT | AAATG | 1325 |
| <i>P. echinata</i> (MZ424449)  | 1281 | TCTTGCTCGT | GAAGGTAATG | AAGTGATCCG | TGAAGCAGCT | AAATG | 1325 |
| <i>P. echinata</i> (NC_065458) | 1281 | TCTTGCTCGT | GAAGGTAATG | AAGTGATCCG | TGAAGCAGCT | AAATG | 1325 |
| <i>P. echinata</i> (AY947435)  | 1281 | TCTTGCTCGT | GAAGGTAATG | AAGTGATCCG | TGAAGCAGCT | AAATG | 1325 |
| <i>P. elliotii</i> (AY724755)  | 1281 | TCTTGCTCGT | GAAGGTAATG | AAGTGATCCG | TGAAGCAGCT | AAATG | 1325 |
| <i>P. elliotii</i> (JN854202)  | 1281 | TCTTGCTCGT | GAAGGTAATG | AAGTGATCCG | TGAAGCAGCT | AAATG | 1325 |
| <i>P. elliotii</i> (NC_042788) | 1281 | TCTTGCTCGT | GAAGGTAATG | AAGTGATCCG | TGAAGCAGCT | AAATG | 1325 |
