# Supplementary material
Source: MDPI journal article supplement (https://www.mdpi.com/1999-4907/14/6/1095)
Supplement: s1 [file s1]

**Supplementary Figure S6.** Alignment of *ycf1b* from *P. densiflora* and *P. sylvestris*

|                                  |     |             |            |            |            |            |            |             |            |     |
|----------------------------------|-----|-------------|------------|------------|------------|------------|------------|-------------|------------|-----|
| <i>P. densiflora</i> (JN854210)  | 1   | CTTAATGGGG  | CATTCCGTGG | AACAATAAAC | CAATTTGAGT | CCCCCCAAAT | GCTGAACGAT | TCGATCATTT  | CGAATCTTTC | 80  |
| <i>P. densiflora</i> (KP089385)  | 1   | CTTAATGGGG  | CATTCCGTGG | AACAATAAAC | CAATTTGAGT | CCCCCCAAAT | GCTGAACGAT | TCGATCATTT  | CGAATCTTTC | 80  |
| <i>P. densiflora</i> (MF990371)  | 1   | CTTAATGGGG  | CATTCCGTGG | AACAATAAAC | CAATTTGAGT | CCCCCCAAAT | GCTGAACGAT | TCGATCATTT  | CGAATCTTTC | 80  |
| <i>P. densiflora</i> (MT786135)  | 1   | CTTAATGGGG  | CATTCCGTGG | AACAATAAAC | CAATTTGAGT | CCCCCCAAAT | GCTGAACGAT | TCGATCATTT  | CGAATCTTTC | 80  |
| <i>P. densiflora</i> (MZ677091)  | 1   | CTTAATGGGG  | CATTCCGTGG | AACAATAAAC | CAATTTGAGT | CCCCCCAAAT | GCTGAACGAT | TCGATCATTT  | CGAATCTTTC | 80  |
| <i>P. densiflora</i> (NC_042394) | 1   | CTTAATGGGG  | CATTCCGTGG | AACAATAAAC | CAATTTGAGT | CCCCCCAAAT | GCTGAACGAT | TCGATCATTT  | CGAATCTTTC | 80  |
| <i>P. densiflora</i> (NC_062639) | 1   | CTTAATGGGG  | CATTCCGTGG | AACAATAAAC | CAATTTGAGT | CCCCCCAAAT | GCTGAACGAT | TCGATCATTT  | CGAATCTTTC | 80  |
| <i>P. densiflora</i> (NC_062640) | 1   | CTTAATGGGG  | CATTCCGTGG | AACAATAAAC | CAATTTGAGT | CCCCCCAAAT | GCTGAACGAT | TCGATCATTT  | CGAATCTTTC | 80  |
| <i>P. sylvestris</i> (JN854158)  | 1   | CTTAATGGGG  | CATTCCGTGG | AACAATAAAC | CAATTTGAGT | CCCCCCAAAT | GCTGAACGAT | TCGATCATTT  | CGAATCTTTC | 80  |
| <i>P. sylvestris</i> (KP089414)  | 1   | CTTAATGGGG  | CATTCCGTGG | AACAATAAAC | CAATTTGAGT | CCCCCCAAAT | GCTGAACGAT | TCGATCATTT  | CGAATCTTTC | 80  |
| <i>P. sylvestris</i> (KR476379)  | 1   | CTTAATGGGG  | CATTCCGTGG | AACAATAAAC | CAATTTGAGT | CCCCCCAAAT | GCTGAACGAT | TCGATCATTT  | CGAATCTTTC | 80  |
| <i>P. sylvestris</i> (MT787466)  | 1   | CTTAATGGGG  | CATTCCGTGG | AACAATAAAC | CAATTTGAGT | CCCCCCAAAT | GCTGAACGAT | TCGATCATTT  | CGAATCTTTC | 80  |
| <i>P. sylvestris</i> (MT796488)  | 1   | CTTAATGGGG  | CATTCCGTGG | AACAATAAAC | CAATTTGAGT | CCCCCCAAAT | GCTGAACGAT | TCGATCATTT  | CGAATCTTTC | 80  |
|                                  |     |             |            |            |            |            |            |             |            |     |
| <i>P. densiflora</i> (JN854210)  | 81  | GGATTTTCATA | GAGATATTTA | TGAGAGACCC | TAAAGAGGGA | TTCCCGAATG | ATCCACTTGG | GTATGGGTAC  | CATATCTCTT | 160 |
| <i>P. densiflora</i> (KP089385)  | 81  | GGATTTTCATA | GAGATATTTA | TGAGAGACCC | TAAAGAGGGA | TTCCCGAATG | ATCCACTTGG | GTATGGGTAC  | CATATCTCTT | 160 |
| <i>P. densiflora</i> (MF990371)  | 81  | GGATTTTCATA | GAGATATTTA | TGAGAGACCC | TAAAGAGGGA | TTCCCGAATG | ATCCACTTGG | GTATGGGTAC  | CATATCTCTT | 160 |
| <i>P. densiflora</i> (MT786135)  | 81  | GGATTTTCATA | GAGATATTTA | TGAGAGACCC | TAAAGAGGGA | TTCCCGAATG | ATCCACTTGG | GTATGGGTAC  | CATATCTCTT | 160 |
| <i>P. densiflora</i> (MZ677091)  | 81  | GGATTTTCATA | GAGATATTTA | TGAGAGACCC | TAAAGAGGGA | TTCCCGAATG | ATCCACTTGG | GTATGGGTAC  | CATATCTCTT | 160 |
| <i>P. densiflora</i> (NC_042394) | 81  | GGATTTTCATA | GAGATATTTA | TGAGAGACCC | TAAAGAGGGA | TTCCCGAATG | ATCCACTTGG | GTATGGGTAC  | CATATCTCTT | 160 |
| <i>P. densiflora</i> (NC_062639) | 81  | GGATTTTCATA | GAGATATTTA | TGAGAGACCC | TAAAGAGGGA | TTCCCGAATG | ATCCACTTGG | GTATGGGTAC  | CATATCTCTT | 160 |
| <i>P. densiflora</i> (NC_062640) | 81  | GGATTTTCATA | GAGATATTTA | TGAGAGACCC | TAAAGAGGGA | TTCCCGAATG | ATCCACTTGG | GTATGGGTAC  | CATATCTCTT | 160 |
| <i>P. sylvestris</i> (JN854158)  | 81  | GGATTTTCATA | GAGATATTTA | TGAGAGACCC | TAAAGAGGGA | TTCCCGAATG | ATCCACTTGG | GTATGGGTAC  | CATATCTCTT | 160 |
| <i>P. sylvestris</i> (KP089414)  | 81  | GGATTTTCATA | GAGATATTTA | TGAGAGACCC | TAAAGAGGGA | TTCCCGAATG | ATCCACTTGG | GTATGGGTAC  | CATATCTCTT | 160 |
| <i>P. sylvestris</i> (KR476379)  | 81  | GGATTTTCATA | GAGATATTTA | TGAGAGACCC | TAAAGAGGGA | TTCCCGAATG | ATCCACTTGG | GTATGGGTAC  | CATATCTCTT | 160 |
| <i>P. sylvestris</i> (MT787466)  | 81  | GGATTTTCATA | GAGATATTTA | TGAGAGACCC | TAAAGAGGGA | TTCCCGAATG | ATCCACTTGG | GTATGGGTAC  | CATATCTCTT | 160 |
| <i>P. sylvestris</i> (MT796488)  | 81  | GGATTTTCATA | GAGATATTTA | TGAGAGACCC | TAAAGAGGGA | TTCCCGAATG | ATCCACTTGG | GTATGGGTAC  | CATATCTCTT | 160 |
|                                  |     |             |            |            |            |            |            |             |            |     |
| <i>P. densiflora</i> (JN854210)  | 161 | ATCTTTGGCA  | GGAATTGGAA | CACGAAAGCT | TTCCACTACC | CTGGGAGCCC | TTACCTACAT | ATACTGTTTCG | TTCGCTTGTC | 240 |
| <i>P. densiflora</i> (KP089385)  | 161 | ATCTTTGGCA  | GGAATTGGAA | CACGAAAGCT | TTCCACTACC | CTGGGAGCCC | TTACCTACAT | ATACTGTTTCG | TTCGCTTGTC | 240 |
| <i>P. densiflora</i> (MF990371)  | 161 | ATCTTTGGCA  | GGAATTGGAA | CACGAAAGCT | TTCCACTACC | CTGGGAGCCC | TTACCTACAT | ATACTGTTTCG | TTCGCTTGTC | 240 |
| <i>P. densiflora</i> (MT786135)  | 161 | ATCTTTGGCA  | GGAATTGGAA | CACGAAAGCT | TTCCACTACC | CTGGGAGCCC | TTACCTACAT | ATACTGTTTCG | TTCGCTTGTC | 240 |
| <i>P. densiflora</i> (MZ677091)  | 161 | ATCTTTGGCA  | GGAATTGGAA | CACGAAAGCT | TTCCACTACC | CTGGGAGCCC | TTACCTACAT | ATACTGTTTCG | TTCGCTTGTC | 240 |
| <i>P. densiflora</i> (NC_042394) | 161 | ATCTTTGGCA  | GGAATTGGAA | CACGAAAGCT | TTCCACTACC | CTGGGAGCCC | TTACCTACAT | ATACTGTTTCG | TTCGCTTGTC | 240 |
| <i>P. densiflora</i> (NC_062639) | 161 | ATCTTTGGCA  | GGAATTGGAA | CACGAAAGCT | TTCCACTACC | CTGGGAGCCC | TTACCTACAT | ATACTGTTTCG | TTCGCTTGTC | 240 |
| <i>P. densiflora</i> (NC_062640) | 161 | ATCTTTGGCA  | GGAATTGGAA | CACGAAAGCT | TTCCACTACC | CTGGGAGCCC | TTACCTACAT | ATACTGTTTCG | TTCGCTTGTC | 240 |
| <i>P. sylvestris</i> (JN854158)  | 161 | ATCTTTGGCA  | GGAATTGGAA | CACGAAAGCT | TTCCACTACC | CTGGGAGCCC | TTACCTACAT | ATACTGTTTCG | TTCGCTTGTC | 240 |
| <i>P. sylvestris</i> (KP089414)  | 161 | ATCTTTGGCA  | GGAATTGGAA | CACGAAAGCT | TTCCACTACC | CTGGGAGCCC | TTACCTACAT | ATACTGTTTCG | TTCGCTTGTC | 240 |
| <i>P. sylvestris</i> (KR476379)  | 161 | ATCTTTGGCA  | GGAATTGGAA | CACGAAAGCT | TTCCACTACC | CTGGGAGCCC | TTACCTACAT | ATACTGTTTCG | TTCGCTTGTC | 240 |
| <i>P. sylvestris</i> (MT787466)  | 161 | ATCTTTGGCA  | GGAATTGGAA | CACGAAAGCT | TTCCACTACC | CTGGGAGCCC | TTACCTACAT | ATACTGTTTCG | TTCGCTTGTC | 240 |
| <i>P. sylvestris</i> (MT796488)  | 161 | ATCTTTGGCA  | GGAATTGGAA | CACGAAAGCT | TTCCACTACC | CTGGGAGCCC | TTACCTACAT | ATACTGTTTCG | TTCGCTTGTC | 240 |

|                      |             | ★   |            |            |                    |            |            |            |            |            |     |
|----------------------|-------------|-----|------------|------------|--------------------|------------|------------|------------|------------|------------|-----|
| <i>P. densiflora</i> | (JN854210)  | 241 | CCGGTCACTA | TATCCTCTAA | TCCCGGAAC <b>T</b> | CCTCAACCCG | AATATGCTTT | AAATAGATTA | AAAAATCAAA | ATATCTCTTA | 320 |
| <i>P. densiflora</i> | (KP089385)  | 241 | CCGGTCACTA | TATCCTCTAA | TCCCGGAAC <b>T</b> | CCTCAACCCG | AATATGCTTT | AAATAGATTA | AAAAATCAAA | ATATCTCTTA | 320 |
| <i>P. densiflora</i> | (MF990371)  | 241 | CCGGTCACTA | TATCCTCTAA | TCCCGGAAC <b>T</b> | CCTCAACCCG | AATATGCTTT | AAATAGATTA | AAAAATCAAA | ATATCTCTTA | 320 |
| <i>P. densiflora</i> | (MT786135)  | 241 | CCGGTCACTA | TATCCTCTAA | TCCCGGAAC <b>T</b> | CCTCAACCCG | AATATGCTTT | AAATAGATTA | AAAAATCAAA | ATATCTCTTA | 320 |
| <i>P. densiflora</i> | (MZ677091)  | 241 | CCGGTCACTA | TATCCTCTAA | TCCCGGAAC <b>C</b> | CCTCAACCCG | AATATGCTTT | AAATAGATTA | AAAAATCAAA | ATATCTCTTA | 320 |
| <i>P. densiflora</i> | (NC_042394) | 241 | CCGGTCACTA | TATCCTCTAA | TCCCGGAAC <b>T</b> | CCTCAACCCG | AATATGCTTT | AAATAGATTA | AAAAATCAAA | ATATCTCTTA | 320 |
| <i>P. densiflora</i> | (NC_062639) | 241 | CCGGTCACTA | TATCCTCTAA | TCCCGGAAC <b>T</b> | CCTCAACCCG | AATATGCTTT | AAATAGATTA | AAAAATCAAA | ATATCTCTTA | 320 |
| <i>P. densiflora</i> | (NC_062640) | 241 | CCGGTCACTA | TATCCTCTAA | TCCCGGAAC <b>T</b> | CCTCAACCCG | AATATGCTTT | AAATAGATTA | AAAAATCAAA | ATATCTCTTA | 320 |
| <i>P. sylvestris</i> | (JN854158)  | 241 | CCGGTCACTA | TATCCTCTAA | TCCCGGAAC <b>T</b> | CCTCAACCCG | AATATGCTTT | AAATAGATTA | AAAAATCAAA | ATATCTCTTA | 320 |
| <i>P. sylvestris</i> | (KP089414)  | 241 | CCGGTCACTA | TATCCTCTAA | TCCCGGAAC <b>T</b> | CCTCAACCCG | AATATGCTTT | AAATAGATTA | AAAAATCAAA | ATATCTCTTA | 320 |
| <i>P. sylvestris</i> | (KR476379)  | 241 | CCGGTCACTA | TATCCTCTAA | TCCCGGAAC <b>T</b> | CCTCAACCCG | AATATGCTTT | AAATAGATTA | AAAAATCAAA | ATATCTCTTA | 320 |
| <i>P. sylvestris</i> | (MT787466)  | 241 | CCGGTCACTA | TATCCTCTAA | TCCCGGAAC <b>T</b> | CCTCAACCCG | AATATGCTTT | AAATAGATTA | AAAAATCAAA | ATATCTCTTA | 320 |
| <i>P. sylvestris</i> | (MT796488)  | 241 | CCGGTCACTA | TATCCTCTAA | TCCCGGAAC <b>T</b> | CCTCAACCCG | AATATGCTTT | AAATAGATTA | AAAAATCAAA | ATATCTCTTA | 320 |

|                      |             | ★   |            |           |            |            |                     |            |            |            |     |
|----------------------|-------------|-----|------------|-----------|------------|------------|---------------------|------------|------------|------------|-----|
| <i>P. densiflora</i> | (JN854210)  | 321 | TCTGATCCAG | ACCCAGAAA | TCCATCCACC | ATATTGGTTG | TGGT <b>T</b> AGCCT | GGAGATCATC | CATTATATAT | GTCCCACTGC | 400 |
| <i>P. densiflora</i> | (KP089385)  | 321 | TCTGATCCAG | ACCCAGAAA | TCCATCCACC | ATATTGGTTG | TGGT <b>T</b> AGCCT | GGAGATCATC | CATTATATAT | GTCCCACTGC | 400 |
| <i>P. densiflora</i> | (MF990371)  | 321 | TCTGATCCAG | ACCCAGAAA | TCCATCCACC | ATATTGGTTG | TGGT <b>T</b> AGCCT | GGAGATCATC | CATTATATAT | GTCCCACTGC | 400 |
| <i>P. densiflora</i> | (MT786135)  | 321 | TCTGATCCAG | ACCCAGAAA | TCCATCCACC | ATATTGGTTG | TGGT <b>T</b> AGCCT | GGAGATCATC | CATTATATAT | GTCCCACTGC | 400 |
| <i>P. densiflora</i> | (MZ677091)  | 321 | TCTGATCCAG | ACCCAGAAA | TCCATCCACC | ATATTGGTTG | TGGG <b>T</b> AGCCT | GGAGATCATC | CATTATATAT | GTCCCACTGC | 400 |
| <i>P. densiflora</i> | (NC_042394) | 321 | TCTGATCCAG | ACCCAGAAA | TCCATCCACC | ATATTGGTTG | TGGT <b>T</b> AGCCT | GGAGATCATC | CATTATATAT | GTCCCACTGC | 400 |
| <i>P. densiflora</i> | (NC_062639) | 321 | TCTGATCCAG | ACCCAGAAA | TCCATCCACC | ATATTGGTTG | TGGG <b>T</b> AGCCT | GGAGATCATC | CATTATATAT | GTCCCACTGC | 400 |
| <i>P. densiflora</i> | (NC_062640) | 321 | TCTGATCCAG | ACCCAGAAA | TCCATCCACC | ATATTGGTTG | TGGG <b>T</b> AGCCT | GGAGATCATC | CATTATATAT | GTCCCACTGC | 400 |
| <i>P. sylvestris</i> | (JN854158)  | 321 | TCTGATCCAG | ACCCAGAAA | TCCATCCACC | ATATTGGTTG | TGGG <b>T</b> AGCCT | GGAGATCATC | CATTATATAT | GTCCCACTGC | 400 |
| <i>P. sylvestris</i> | (KP089414)  | 321 | TCTGATCCAG | ACCCAGAAA | TCCATCCACC | ATATTGGTTG | TGGG <b>T</b> AGCCT | GGAGATCATC | CATTATATAT | GTCCCACTGC | 400 |
| <i>P. sylvestris</i> | (KR476379)  | 321 | TCTGATCCAG | ACCCAGAAA | TCCATCCACC | ATATTGGTTG | TGGG <b>T</b> AGCCT | GGAGATCATC | CATTATATAT | GTCCCACTGC | 400 |
| <i>P. sylvestris</i> | (MT787466)  | 321 | TCTGATCCAG | ACCCAGAAA | TCCATCCACC | ATATTGGTTG | TGGG <b>T</b> AGCCT | GGAGATCATC | CATTATATAT | GTCCCACTGC | 400 |
| <i>P. sylvestris</i> | (MT796488)  | 321 | TCTGATCCAG | ACCCAGAAA | TCCATCCACC | ATATTGGTTG | TGGG <b>T</b> AGCCT | GGAGATCATC | CATTATATAT | GTCCCACTGC | 400 |

|                                  |     |            |            |            |            |            |            |            |            |     |
|----------------------------------|-----|------------|------------|------------|------------|------------|------------|------------|------------|-----|
| <i>P. densiflora</i> (JN854210)  | 401 | AAGTAGCTAG | ATGTTATGGA | GAGATCTACA | CAAGCTTTTT | AGTTAATGTT | TCCGGCCGAT | TTGACCGTAT | AAAACCTTCG | 480 |
| <i>P. densiflora</i> (KP089385)  | 401 | AAGTAGCTAG | ATGTTATGGA | GAGATCTACA | CAAGCTTTTT | AGTTAATGTT | TCCGGCCGAT | TTGACCGTAT | AAAACCTTCG | 480 |
| <i>P. densiflora</i> (MF990371)  | 401 | AAGTAGCTAG | ATGTTATGGA | GAGATCTACA | CAAGCTTTTT | AGTTAATGTT | TCCGGCCGAT | TTGACCGTAT | AAAACCTTCG | 480 |
| <i>P. densiflora</i> (MT786135)  | 401 | AAGTAGCTAG | ATGTTATGGA | GAGATCTACA | CAAGCTTTTT | AGTTAATGTT | TCCGGCCGAT | TTGACCGTAT | AAAACCTTCG | 480 |
| <i>P. densiflora</i> (MZ677091)  | 401 | AAGTAGCTAG | ATGTTATGGA | GAGATCTACA | CAAGCTTTTT | AGTTAATGTT | TCCGGCCGAT | TTGACCGTAT | AAAACCTTCG | 480 |
| <i>P. densiflora</i> (NC_042394) | 401 | AAGTAGCTAG | ATGTTATGGA | GAGATCTACA | CAAGCTTTTT | AGTTAATGTT | TCCGGCCGAT | TTGACCGTAT | AAAACCTTCG | 480 |
| <i>P. densiflora</i> (NC_062639) | 401 | AAGTAGCTAG | ATGTTATGGA | GAGATCTACA | CAAGCTTTTT | AGTTAATGTT | TCCGGCCGAT | TTGACCGTAT | AAAACCTTCG | 480 |
| <i>P. densiflora</i> (NC_062640) | 401 | AAGTAGCTAG | ATGTTATGGA | GAGATCTACA | CAAGCTTTTT | AGTTAATGTT | TCCGGCCGAT | TTGACCGTAT | AAAACCTTCG | 480 |
| <i>P. sylvestris</i> (JN854158)  | 401 | AAGTAGCTAG | ATGTTATGGA | GAGATCTACA | CAAGCTTTTT | AGTTAATGTT | TCCGGCCGAT | TTGACCGTAT | AAAACCTTCG | 480 |
| <i>P. sylvestris</i> (KP089414)  | 401 | AAGTAGCTAG | ATGTTATGGA | GAGATCTACA | CAAGCTTTTT | AGTTAATGTT | TCCGGCCGAT | TTGACCGTAT | AAAACCTTCG | 480 |
| <i>P. sylvestris</i> (KR476379)  | 401 | AAGTAGCTAG | ATGTTATGGA | GAGATCTACA | CAAGCTTTTT | AGTTAATGTT | TCCGGCCGAT | TTGACCGTAT | AAAACCTTCG | 480 |
| <i>P. sylvestris</i> (MT787466)  | 401 | AAGTAGCTAG | ATGTTATGGA | GAGATCTACA | CAAGCTTTTT | AGTTAATGTT | TCCGGCCGAT | TTGACCGTAT | AAAACCTTCG | 480 |
| <i>P. sylvestris</i> (MT796488)  | 401 | AAGTAGCTAG | ATGTTATGGA | GAGATCTACA | CAAGCTTTTT | AGTTAATGTT | TCCGGCCGAT | TTGACCGTAT | AAAACCTTCG | 480 |

|                                  |     |            |            |           |            |            |            |            |             |     |
|----------------------------------|-----|------------|------------|-----------|------------|------------|------------|------------|-------------|-----|
| <i>P. densiflora</i> (JN854210)  | 481 | ACCTCAGGTA | TGGTAAAACT | GGATTGATT | TCTCGTCTGT | TTAAGAAGGA | ATATCTTTTC | GTTTAAGAAT | TTGTTTTCCCT | 560 |
| <i>P. densiflora</i> (KP089385)  | 481 | ACCTCAGGTA | TGGTAAAACT | GGATTGATT | TCTCGTCTGT | TTAAGAAGGA | ATATCTTTTC | GTTTAAGAAT | TTGTTTTCCCT | 560 |
| <i>P. densiflora</i> (MF990371)  | 481 | ACCTCAGGTA | TGGTAAAACT | GGATTGATT | TCTCGTCTGT | TTAAGAAGGA | ATATCTTTTC | GTTTAAGAAT | TTGTTTTCCCT | 560 |
| <i>P. densiflora</i> (MT786135)  | 481 | ACCTCAGGTA | TGGTAAAACT | GGATTGATT | TCTCGTCTGT | TTAAGAAGGA | ATATCTTTTC | GTTTAAGAAT | TTGTTTTCCCT | 560 |
| <i>P. densiflora</i> (MZ677091)  | 481 | ACCTCAGGTA | TGGTAAAACT | GGATTGATT | TCTCGTCTGT | TTAAGAAGGA | ATATCTTTTC | GTTTAAGAAT | TTGTTTTCCCT | 560 |
| <i>P. densiflora</i> (NC_042394) | 481 | ACCTCAGGTA | TGGTAAAACT | GGATTGATT | TCTCGTCTGT | TTAAGAAGGA | ATATCTTTTC | GTTTAAGAAT | TTGTTTTCCCT | 560 |
| <i>P. densiflora</i> (NC_062639) | 481 | ACCTCAGGTA | TGGTAAAACT | GGATTGATT | TCTCGTCTGT | TTAAGAAGGA | ATATCTTTTC | GTTTAAGAAT | TTGTTTTCCCT | 560 |
| <i>P. densiflora</i> (NC_062640) | 481 | ACCTCAGGTA | TGGTAAAACT | GGATTGATT | TCTCGTCTGT | TTAAGAAGGA | ATATCTTTTC | GTTTAAGAAT | TTGTTTTCCCT | 560 |
| <i>P. sylvestris</i> (JN854158)  | 481 | ACCTCAGGTA | TGGTAAAACT | GGATTGATT | TCTCGTCTGT | TTAAGAAGGA | ATATCTTTTC | GTTTAAGAAT | TTGTTTTCCCT | 560 |
| <i>P. sylvestris</i> (KP089414)  | 481 | ACCTCAGGTA | TGGTAAAACT | GGATTGATT | TCTCGTCTGT | TTAAGAAGGA | ATATCTTTTC | GTTTAAGAAT | TTGTTTTCCCT | 560 |
| <i>P. sylvestris</i> (KR476379)  | 481 | ACCTCAGGTA | TGGTAAAACT | GGATTGATT | TCTCGTCTGT | TTAAGAAGGA | ATATCTTTTC | GTTTAAGAAT | TTGTTTTCCCT | 560 |
| <i>P. sylvestris</i> (MT787466)  | 481 | ACCTCAGGTA | TGGTAAAACT | GGATTGATT | TCTCGTCTGT | TTAAGAAGGA | ATATCTTTTC | GTTTAAGAAT | TTGTTTTCCCT | 560 |
| <i>P. sylvestris</i> (MT796488)  | 481 | ACCTCAGGTA | TGGTAAAACT | GGATTGATT | TCTCGTCTGT | TTAAGAAGGA | ATATCTTTTC | GTTTAAGAAT | TTGTTTTCCCT | 560 |



|                                  |     |            |            |            |            |            |            |            |            |      |
|----------------------------------|-----|------------|------------|------------|------------|------------|------------|------------|------------|------|
| <i>P. densiflora</i> (JN854210)  | 961 | TCCCTTTTCT | TTTTGAAAAG | AAAAGAAATA | CCCGCTTATC | CTAAAGATTA | TTATGACACG | TCCGATTCTG | GTAGAGTGGA | 1040 |
| <i>P. densiflora</i> (KP089385)  | 961 | TCCCTTTTCT | TTTTGAAAAG | AAAAGAAATA | CCCGCTTATC | CTAAAGATTA | TTATGACACG | TCCGATTCTG | GTAGAGTGGA | 1040 |
| <i>P. densiflora</i> (MF990371)  | 961 | TCCCTTTTCT | TTTTGAAAAG | AAAAGAAATA | CCCGCTTATC | CTAAAGATTA | TTATGACACG | TCCGATTCTG | GTAGAGTGGA | 1040 |
| <i>P. densiflora</i> (MT786135)  | 961 | TCCCTTTTCT | TTTTGAAAAG | AAAAGAAATA | CCCGCTTATC | CTAAAGATTA | TTATGACACG | TCCGATTCTG | GTAGAGTGGA | 1040 |
| <i>P. densiflora</i> (MZ677091)  | 961 | TCCCTTTTCT | TTTTGAAAAG | AAAAGAAATA | CCCGCTTATC | CTAAAGATTA | TTATGACACG | TCCGATTCTG | GTAGAGTGGA | 1040 |
| <i>P. densiflora</i> (NC_042394) | 961 | TCCCTTTTCT | TTTTGAAAAG | AAAAGAAATA | CCCGCTTATC | CTAAAGATTA | TTATGACACG | TCCGATTCTG | GTAGAGTGGA | 1040 |
| <i>P. densiflora</i> (NC_062639) | 961 | TCCCTTTTCT | TTTTGAAAAG | AAAAGAAATA | CCCGCTTATC | CTAAAGATTA | TTATGACACG | TCCGATTCTG | GTAGAGTGGA | 1040 |
| <i>P. densiflora</i> (NC_062640) | 961 | TCCCTTTTCT | TTTTGAAAAG | AAAAGAAATA | CCCGCTTATC | CTAAAGATTA | TTATGACACG | TCCGATTCTG | GTAGAGTGGA | 1040 |
| <i>P. sylvestris</i> (JN854158)  | 961 | TCCCTTTTCT | TTTTGAAAAG | AAAAGAAATA | CCCGCTTATC | CTAAAGATTA | TTATGACACG | TCCGATTCTG | GTAGAGTGGA | 1040 |
| <i>P. sylvestris</i> (KP089414)  | 961 | TCCCTTTTCT | TTTTGAAAAG | AAAAGAAATA | CCCGCTTATC | CTAAAGATTA | TTATGACACG | TCCGATTCTG | GTAGAGTGGA | 1040 |
| <i>P. sylvestris</i> (KR476379)  | 961 | TCCCTTTTCT | TTTTGAAAAG | AAAAGAAATA | CCCGCTTATC | CTAAAGATTA | TTATGACACG | TCCGATTCTG | GTAGAGTGGA | 1040 |
| <i>P. sylvestris</i> (MT787466)  | 961 | TCCCTTTTCT | TTTTGAAAAG | AAAAGAAATA | CCCGCTTATC | CTAAAGATTA | TTATGACACG | TCCGATTCTG | GTAGAGTGGA | 1040 |
| <i>P. sylvestris</i> (MT796488)  | 961 | TCCCTTTTCT | TTTTGAAAAG | AAAAGAAATA | CCCGCTTATC | CTAAAGATTA | TTATGACACG | TCCGATTCTG | GTAGAGTGGA | 1040 |

|                                  |      |            |            |            |            |            |            |            |            |      |
|----------------------------------|------|------------|------------|------------|------------|------------|------------|------------|------------|------|
| <i>P. densiflora</i> (JN854210)  | 1041 | TAAGGAACAA | ATCGGGGAAG | AAGTTAGGGA | AAAAATCCAG | AGAGTCGAAG | ATCCATTATC | CCAGCAGACA | ATTGCTGAGT | 1120 |
| <i>P. densiflora</i> (KP089385)  | 1041 | TAAGGAACAA | ATCGGGGAAG | AAGTTAGGGA | AAAAATCCAG | AGAGTCGAAG | ATCCATTATC | CCAGCAGACA | ATTGCTGAGT | 1120 |
| <i>P. densiflora</i> (MF990371)  | 1041 | TAAGGAACAA | ATCGGGGAAG | AAGTTAGGGA | AAAAATCCAG | AGAGTCGAAG | ATCCATTATC | CCAGCAGACA | ATTGCTGAGT | 1120 |
| <i>P. densiflora</i> (MT786135)  | 1041 | TAAGGAACAA | ATCGGGGAAG | AAGTTAGGGA | AAAAATCCAG | AGAGTCGAAG | ATCCATTATC | CCAGCAGACA | ATTGCTGAGT | 1120 |
| <i>P. densiflora</i> (MZ677091)  | 1041 | TAAGGAACAA | ATCGGGGAAG | AAGTTAGGGA | AAAAATCCAG | AGAGTCGAAG | ATCCATTATC | CCAGCAGACA | ATTGCTGAGT | 1120 |
| <i>P. densiflora</i> (NC_042394) | 1041 | TAAGGAACAA | ATCGGGGAAG | AAGTTAGGGA | AAAAATCCAG | AGAGTCGAAG | ATCCATTATC | CCAGCAGACA | ATTGCTGAGT | 1120 |
| <i>P. densiflora</i> (NC_062639) | 1041 | TAAGGAACAA | ATCGGGGAAG | AAGTTAGGGA | AAAAATCCAG | AGAGTCGAAG | ATCCATTATC | CCAGCAGACA | ATTGCTGAGT | 1120 |
| <i>P. densiflora</i> (NC_062640) | 1041 | TAAGGAACAA | ATCGGGGAAG | AAGTTAGGGA | AAAAATCCAG | AGAGTCGAAG | ATCCATTATC | CCAGCAGACA | ATTGCTGAGT | 1120 |
| <i>P. sylvestris</i> (JN854158)  | 1041 | TAAGGAACAA | ATCGGGGAAG | AAGTTAGGGA | AAAAATCCAG | AGAGTCGAAG | ATCCATTATC | CCAGCAGACA | ATTGCTGAGT | 1120 |
| <i>P. sylvestris</i> (KP089414)  | 1041 | TAAGGAACAA | ATCGGGGAAG | AAGTTAGGGA | AAAAATCCAG | AGAGTCGAAG | ATCCATTATC | CCAGCAGACA | ATTGCTGAGT | 1120 |
| <i>P. sylvestris</i> (KR476379)  | 1041 | TAAGGAACAA | ATCGGGGAAG | AAGTTAGGGA | AAAAATCCAG | AGAGTCGAAG | ATCCATTATC | CCAGCAGACA | ATTGCTGAGT | 1120 |
| <i>P. sylvestris</i> (MT787466)  | 1041 | TAAGGAACAA | ATCGGGGAAG | AAGTTAGGGA | AAAAATCCAG | AGAGTCGAAG | ATCCATTATC | CCAGCAGACA | ATTGCTGAGT | 1120 |
| <i>P. sylvestris</i> (MT796488)  | 1041 | TAAGGAACAA | ATCGGGGAAG | AAGTTAGGGA | AAAAATCCAG | AGAGTCGAAG | ATCCATTATC | CCAGCAGACA | ATTGCTGAGT | 1120 |

|                                  |      |            |            |            |            |            |            |      |      |
|----------------------------------|------|------------|------------|------------|------------|------------|------------|------|------|
| <i>P. densiflora</i> (JN854210)  | 1121 | CCTTATGTTT | AGCGTGGCCA | GAATTGCACT | ATTTGAGAGG | TTTATTATTA | ATGGCTCAAT | CAAA | 1184 |
| <i>P. densiflora</i> (KP089385)  | 1121 | CCTTATGTTT | AGCGTGGCCA | GAATTGCACT | ATTTGAGAGG | TTTATTATTA | ATGGCTCAAT | CAAA | 1184 |
| <i>P. densiflora</i> (MF990371)  | 1121 | CCTTATGTTT | AGCGTGGCCA | GAATTGCACT | ATTTGAGAGG | TTTATTATTA | ATGGCTCAAT | CAAA | 1184 |
| <i>P. densiflora</i> (MT786135)  | 1121 | CCTTATGTTT | AGCGTGGCCA | GAATTGCACT | ATTTGAGAGG | TTTATTATTA | ATGGCTCAAT | CAAA | 1184 |
| <i>P. densiflora</i> (MZ677091)  | 1121 | CCTTATGTTT | AGCGTGGCCA | GAATTGCACT | ATTTGAGAGG | TTTATTATTA | ATGGCTCAAT | CAAA | 1184 |
| <i>P. densiflora</i> (NC_042394) | 1121 | CCTTATGTTT | AGCGTGGCCA | GAATTGCACT | ATTTGAGAGG | TTTATTATTA | ATGGCTCAAT | CAAA | 1184 |
| <i>P. densiflora</i> (NC_062639) | 1121 | CCTTATGTTT | AGCGTGGCCA | GAATTGCACT | ATTTGAGAGG | TTTATTATTA | ATGGCTCAAT | CAAA | 1184 |
| <i>P. densiflora</i> (NC_062640) | 1121 | CCTTATGTTT | AGCGTGGCCA | GAATTGCACT | ATTTGAGAGG | TTTATTATTA | ATGGCTCAAT | CAAA | 1184 |
| <i>P. sylvestris</i> (JN854158)  | 1121 | CCTTATGTTT | AGCGTGGCCA | GAATTGCACT | ATTTGAGAGG | TTTATTATTA | ATGGCTCAAT | CAAA | 1184 |
| <i>P. sylvestris</i> (KP089414)  | 1121 | CCTTATGTTT | AGCGTGGCCA | GAATTGCACT | ATTTGAGAGG | TTTATTATTA | ATGGCTCAAT | CAAA | 1184 |
| <i>P. sylvestris</i> (KR476379)  | 1121 | CCTTATGTTT | AGCGTGGCCA | GAATTGCACT | ATTTGAGAGG | TTTATTATTA | ATGGCTCAAT | CAAA | 1184 |
| <i>P. sylvestris</i> (MT787466)  | 1121 | CCTTATGTTT | AGCGTGGCCA | GAATTGCACT | ATTTGAGAGG | TTTATTATTA | ATGGCTCAAT | CAAA | 1184 |
| <i>P. sylvestris</i> (MT796488)  | 1121 | CCTTATGTTT | AGCGTGGCCA | GAATTGCACT | ATTTGAGAGG | TTTATTATTA | ATGGCTCAAT | CAAA | 1184 |
