# Supplementary material
Source: MDPI journal article supplement (https://www.mdpi.com/1999-4907/14/6/1095)
Supplement: s1 [file s1]

# Supplementary Figure S4. Alignment of *yefIb* from *P. radiata* and *P. taeda*

|                              |     |            |             |            |             |             |            |            |            |     |
|------------------------------|-----|------------|-------------|------------|-------------|-------------|------------|------------|------------|-----|
| <i>P. radiata</i> (JN854165) | 1   | CTTAATGGGG | CATTCCGTGG  | AACAATAAAC | CAATTTGAGT  | CCTCCCCAAT  | GCTGAACGAT | TCGATCATTT | CGAATCTTTC | 80  |
| <i>P. radiata</i> (KC157129) | 1   | CTTAATGGGG | CATTCCGTGG  | AACAATAAAC | CAATTTGAGT  | CCTCCCCAAT  | GCTGAACGAT | TCGATCATTT | CGAATCTTTC | 80  |
| <i>P. taeda</i> (FJ899561)   | 1   | CTTAATGGGG | CATTCCGTGG  | AACAATAAAC | CAATTTGAGT  | CCTCCCCAAT  | GCTGAACGAT | TCGATCATTT | CGAATCTTTC | 80  |
| <i>P. taeda</i> (KY964286)   | 1   | CTTAATGGGG | CATTCCGTGG  | AACAATAAAC | CAATTTGAGT  | CCTCCCCAAT  | GCTGAACGAT | TCGATCATTT | CGAATCTTTC | 80  |
| <i>P. taeda</i> (KC157082)   | 1   | CTTAATGGGG | CATTCCGTGG  | AACAATAAAC | CAATTTGAGT  | CCTCCCCAAT  | GCTGAACGAT | TCGATCATTT | CGAATCTTTC | 80  |
| <i>P. taeda</i> (KC427273)   | 1   | CTTAATGGGG | CATTCCGTGG  | AACAATAAAC | CAATTTGAGT  | CCTCCCCAAT  | GCTGAACGAT | TCGATCATTT | CGAATCTTTC | 80  |
|                              |     |            |             |            |             |             |            |            |            |     |
| <i>P. radiata</i> (JN854165) | 81  | GGATTTCATA | GAGATATCTA  | TTCCATTTGG | GTATGGGTAC  | CATATCTCTT  | ATCTTTGGCA | GGAATTGGAA | CACGAAAGCT | 160 |
| <i>P. radiata</i> (KC157129) | 81  | GGATTTCATA | GAGATATCTA  | TTCCATTTGG | GTATGGGTAC  | CATATCTCTT  | ATCTTTGGCA | GGAATTGGAA | CACGAAAGCT | 160 |
| <i>P. taeda</i> (FJ899561)   | 81  | GGATTTCATA | GAGATATCTA  | TTCCATTTGG | GTATGGGTAC  | CATATCTCTT  | ATCTTTGGCA | GGAATTGGAA | CACGAAAGCT | 160 |
| <i>P. taeda</i> (KY964286)   | 81  | GGATTTCATA | GAGATATCTA  | TTCCATTTGG | GTATGGGTAC  | CATATCTCTT  | ATCTTTGGCA | GGAATTGGAA | CACGAAAGCT | 160 |
| <i>P. taeda</i> (KC157082)   | 81  | GGATTTCATA | GAGATATCTA  | TTCCATTTGG | GTATGGGTAC  | CATATCTCTT  | ATCTTTGGCA | GGAATTGGAA | CACGAAAGCT | 160 |
| <i>P. taeda</i> (KC427273)   | 81  | GGATTTCATA | GAGATATCTA  | TTCCATTTGG | GTATGGGTAC  | CATATCTCTT  | ATCTTTGGCA | GGAATTGGAA | CACGAAAGCT | 160 |
|                              |     |            |             |            |             |             |            |            |            |     |
| <i>P. radiata</i> (JN854165) | 161 | TTCAACTACC | CTGGGAGCCC  | TTACCTACAG | ATGCTGTTTCG | TTTCGCTTATC | CCGATCACTC | CATCTATAGT | TTTTTCCAAT | 240 |
| <i>P. radiata</i> (KC157129) | 161 | TTCAACTACC | CTGGGAGCCC  | TTACCTACAG | ATGCTGTTTCG | TTTCGCTTATC | CCGATCACTC | CATCTATAGT | TTTTTCCAAT | 240 |
| <i>P. taeda</i> (FJ899561)   | 161 | TTCAACTACC | CTGGGAGCCC  | TTACCTACAG | ATGCTGTTTCG | TTTCGCTTATC | CCGATCACTC | CATCTATAGT | TTTTTCCAAT | 240 |
| <i>P. taeda</i> (KY964286)   | 161 | TTCAACTACC | CTGGGAGCCC  | TTACCTACAG | ATGCTGTTTCG | TTTCGCTTATC | CCGATCACTC | CATCTATAGT | TTTTTCCAAT | 240 |
| <i>P. taeda</i> (KC157082)   | 161 | TTCAACTACC | CTGGGAGCCC  | TTACCTATAG | ATGCTGTTTCG | TTTCGCTTATC | CCGATCACTC | CATCTATAGT | TTTTTCCAAT | 240 |
| <i>P. taeda</i> (KC427273)   | 161 | TTCAACTACC | CTGGGAGCCC  | TTACCTATAG | ATGCTGTTTCG | TTTCGCTTATC | CCGATCACTC | CATCTATAGT | TTTTTCCAAT | 240 |
|                              |     |            |             |            |             |             |            |            |            |     |
| <i>P. radiata</i> (JN854165) | 241 | GTCCCGATCA | CTAAAGACTT  | GCCCTCTGAT | CCGATCCCAG  | AACTCAATCA  | AGATATTGGT | TGGCATCAGC | CTTGAGAATA | 320 |
| <i>P. radiata</i> (KC157129) | 241 | GTCCCGATCA | CTAAAGACTT  | GCCCTCTGAT | CCGATCCCAG  | AACTCAATCA  | AGATATTGGT | TGGCATCAGC | CTTGAGAATA | 320 |
| <i>P. taeda</i> (FJ899561)   | 241 | GTCCCGATCA | CTAAAGACTT  | GCCCTCTGAT | CCGATCCCAG  | AACTCAATCA  | AGATATTGGT | TGGCATCAGC | CTTGAGAATA | 320 |
| <i>P. taeda</i> (KY964286)   | 241 | GTCCCGATCA | CTAAAGACTT  | GCCCTCTGAT | CCGATCCCAG  | AACTCAATCA  | ATATATTGGT | TGGCATCAGC | CTTGAGAATA | 320 |
| <i>P. taeda</i> (KC157082)   | 241 | GTCCCGATCA | CTAAAGACTT  | GCCCTCTGAT | CCGATCCCAG  | AACTCAATCA  | ATATATTGGT | TGGCATCAGC | CTTGAGAATA | 320 |
| <i>P. taeda</i> (KC427273)   | 241 | GTCCCGATCA | CTAAAGACTT  | GCCCTCTGAT | CCGATCCCAG  | AACTCAATCA  | ATATATTGGT | TGGCATCAGC | CTTGAGAATA | 320 |
|                              |     |            |             |            |             |             |            |            |            |     |
| <i>P. radiata</i> (JN854165) | 321 | TAAATCTCAT | ACGGCAAATG  | GCTTCATGTA | ATGGACCGTT  | CTACGCAACC  | TATTTAACTT | ATTTTTTCAA | CAAAGTTGGC | 400 |
| <i>P. radiata</i> (KC157129) | 321 | TAAATCTCAT | ACGGCAAATG  | GCTTCATGTA | ATGGACCGTT  | CTACGCAACC  | TATTTAACTT | ATTTTTTCAA | CAAAGTTGGC | 400 |
| <i>P. taeda</i> (FJ899561)   | 321 | TAAATCTCAT | ACGGCAAATG  | GCTTCATGTA | ATGGACCGTT  | CTACGCAACC  | TATTTAACTT | ATTTTTTCAA | CAAAGTTGGC | 400 |
| <i>P. taeda</i> (KY964286)   | 321 | TAAATCTCAT | ACGGCAAACG  | GCTTCATGTA | ATGGACCGTT  | CTACGCAACC  | TATTTAACTC | ATTTTTTCAA | CAAAGTTGGC | 400 |
| <i>P. taeda</i> (KC157082)   | 321 | TAAATCTCAT | ACGGCAAACG  | GCTTCATGTA | ATGGACCGTT  | CTACGCAACC  | TATTTAACTC | ATTTTTTCAA | CAAAGTTGGC | 400 |
| <i>P. taeda</i> (KC427273)   | 321 | TAAATCTCAT | ACGGCAAACG  | GCTTCATGTA | ATGGACCGTT  | CTACGCAACC  | TATTTAACTC | ATTTTTTCAA | CAAAGTTGGC | 400 |
|                              |     |            |             |            |             |             |            |            |            |     |
| <i>P. radiata</i> (JN854165) | 401 | CGTAAAAAAG | TTCCCAACAAC | TTTCCTACCA | ATGGAATTGC  | TTGTTCCCTAT | TTTTAAAAAG | GAATATCTTT | TCGTTTAATA | 480 |
| <i>P. radiata</i> (KC157129) | 401 | CGTAAAAAAG | TTCCCAACAAC | TTTCCTACCA | ATGGAATTGC  | TTGTTCCCTAT | TTTTAAAAAG | GAATATCTTT | TCGTTTAATA | 480 |
| <i>P. taeda</i> (FJ899561)   | 401 | CGTAAAAAAG | TTCCCAACAAC | TTTCCTACCA | ATGGAATTGC  | TTGTTCCCTAT | TTTTAAAAAG | GAATATCTTT | TCGTTTAATA | 480 |
| <i>P. taeda</i> (KY964286)   | 401 | CGTAAAAAAG | TTCCCAACAAC | TTTCATACCA | ATGGAATTGC  | TTATTCCTAT  | TTTTAAAAAG | GAATATCTTT | TCACTTAATA | 480 |
| <i>P. taeda</i> (KC157082)   | 401 | CGTAAAAAAG | TTCCCAACAAC | TTTCATACCA | ATGGAATTGC  | TTATTCCTAT  | TTTTAAAAAG | GAATATCTTT | TCACTTAATA | 480 |
| <i>P. taeda</i> (KC427273)   | 401 | CGTAAAAAAG | TTCCCAACAAC | TTTCATACCA | ATGGAATTGC  | TTATTCCTAT  | TTTTAAAAAG | GAATATCTTT | TCACTTAATA | 480 |
|                              |     |            |             |            |             |             |            |            |            |     |
| <i>P. radiata</i> (JN854165) | 481 | TGAGTGGGCA | ATACTAATAA  | ATTCACGCGA | GAAATTTATCT | TTGGATGATT  | CATGCAAAAG | AAAGATTTTA | TTGCCCTTTA | 560 |
| <i>P. radiata</i> (KC157129) | 481 | TGAGTGGGCA | ATACTAATAA  | ATTCACGCGA | GAAATTTATCT | TTGGATGATT  | CATGCAAAAG | AAAGATTTTA | TTGCCCTTTA | 560 |
| <i>P. taeda</i> (FJ899561)   | 481 | TGAGTGGGTA | ATACTAATAA  | ATTCACGCGA | GAAATTTATCT | TTGGATGATT  | CATGCAAAAG | AAAGATTTTA | TTGCCCTTTA | 560 |
| <i>P. taeda</i> (KY964286)   | 481 | TGAGTGGGTA | ATGCTAATAA  | ATTCACGCGA | GATTTTATCT  | TTGGATGATT  | CATGCAAAAG | AAAGATTTTA | TTGCCCTTTA | 560 |
| <i>P. taeda</i> (KC157082)   | 481 | TGAGTGGGTA | ATGCTAATAA  | ATTCACGCGA | GATTTTATCT  | TTGGATGATT  | CATGCAAAAG | AAAGATTTTA | TTGCCCTTTA | 560 |
| <i>P. taeda</i> (KC427273)   | 481 | TGAGTGGGTA | ATGCTAATAA  | ATTCACGCGA | GATTTTATCT  | TTGGATGATT  | CATGCAAAAG | AAAGATTTTA | TTGCCCTTTA | 560 |

|                              |      |            |            |            |            |             |            |            |            |      |
|------------------------------|------|------------|------------|------------|------------|-------------|------------|------------|------------|------|
| <i>P. radiata</i> (JN854165) | 561  | CAGGGAAATA | CTATTAAATG | AACCTCTCCA | AATTAGAGAA | ATTCGGAAAC  | ATGTGCCTCG | ATGGTCATCT | GGTTTGAGGA | 640  |
| <i>P. radiata</i> (KC157129) | 561  | CAGGGAAATA | CTATTAAATG | AACCTCTCCA | AATTAGAGAA | ATTCGGAAAC  | ATGTGCCTCG | ATGGTCATCT | GGTTTGAGGA | 640  |
| <i>P. taeda</i> (FJ899561)   | 561  | CAGGGAAATA | CTATTAAATG | AACCTCTCCA | AATTAGAGAA | ATTCGGAAAC  | ATGTGCCTCG | ATGGTCATCT | GGTTTGAGGA | 640  |
| <i>P. taeda</i> (KY964286)   | 561  | CAGGGAAATA | CTATTAAATG | AACCTCTCCA | AATTAGAGAA | ATTCGGAAAC  | ATGTGCCTCG | ATGGTCATCT | GGTTTGAGGA | 640  |
| <i>P. taeda</i> (KC157082)   | 561  | CAGGGAAATA | CTATTAAATG | AACCTCTCCA | AATTAGAGAA | ATTCGGAAAC  | ATGTGCCTCG | ATGGTCATCT | GGTTTGAGGA | 640  |
| <i>P. taeda</i> (KC427273)   | 561  | CAGGGAAATA | CTATTAAATG | AACCTCTCCA | AATTAGAGAA | ATTCGGAAAC  | ATGTGCCTCG | ATGGTCATCT | GGTTTGAGGA | 640  |
| *                            |      |            |            |            |            |             |            |            |            |      |
| <i>P. radiata</i> (JN854165) | 641  | TAGGTGAATA | TGATGACGTA | GACCCAATTC | TATTACCATC | GAATACTTTC  | GATATGACTT | TGATATTGGG | CAAAGAGGAG | 720  |
| <i>P. radiata</i> (KC157129) | 641  | TAGGTGAATA | TGATGACGTA | GACCCAATTC | TATTACCATC | GAATACTTTC  | GATATGACTT | TGATATTGGG | CAAAGAGGAG | 720  |
| <i>P. taeda</i> (FJ899561)   | 641  | TAGGTGAATA | TGATGACGTA | GACCCAATTC | TATTACCATC | GAATACTTTC  | GATATGACTT | TAATATTGGG | CAAAGAGGAG | 720  |
| <i>P. taeda</i> (KY964286)   | 641  | TAGGTGAATA | TGATGACGTA | GACCCAATTC | TATTACCATC | GAATACTTTC  | GATATGACTT | TGATATTGGG | CAAAGAGGAG | 720  |
| <i>P. taeda</i> (KC157082)   | 641  | TAGGTGAATA | TGATGACGTA | GACCCAATTC | TATTACCATC | GAATACTTTC  | GATATGACTT | TGATATTGGG | CAAAGAGGAG | 720  |
| <i>P. taeda</i> (KC427273)   | 641  | TAGGTGAATA | TGATGACGTA | GACCCAATTC | TATTACCATC | GAATACTTTC  | GATATGACTT | TGATATTGGG | CAAAGAGGAG | 720  |
| *                            |      |            |            |            |            |             |            |            |            |      |
| <i>P. radiata</i> (JN854165) | 721  | CAGTTCAAAA | CCGTTATTCT | GCCGAGGCAG | ATTATCGTCG | GAACTTAATC  | AAAGGATCCA | TACGTGCTAA | AAGACGGAAA | 800  |
| <i>P. radiata</i> (KC157129) | 721  | CAGTTCAAAA | CCGTTATTCT | GCCGAGGCAG | ATTATCGTCG | GAACTTAATC  | AAAGGATCCA | TACGTGCTAA | AAGACGGAAA | 800  |
| <i>P. taeda</i> (FJ899561)   | 721  | CAGTTCAAAA | CCGTTATTCT | TCCGAGGCAG | ATTATCGTCG | GAACTTAATC  | AAAGGATCCA | TACGTGCTAA | AAGACGGAAA | 800  |
| <i>P. taeda</i> (KY964286)   | 721  | TAGTTCAAAA | CCGTTATTCT | GCCGAGGCAG | ATTATCGTCG | GAACTTAATC  | AAAGGATCCA | TACGTGCTAA | AAGACGGAAA | 800  |
| <i>P. taeda</i> (KC157082)   | 721  | CAGTTCAAAA | CCGTTATTCT | GCCGAGGCAG | ATTATCGTCG | GAACTTAATC  | AAAGGATCCA | TACGTGCTAA | AAGACGGAAA | 800  |
| <i>P. taeda</i> (KC427273)   | 721  | CAGTTCAAAA | CCGTTATTCT | GCCGAGGCAG | ATTATCGTCG | GAACTTAATC  | AAAGGATCCA | TACGTGCTAA | AAGACGGAAA | 800  |
| *                            |      |            |            |            |            |             |            |            |            |      |
| <i>P. radiata</i> (JN854165) | 801  | ATTTGATATG | GAAAAGGGTA | CAACCGAATG | TACATTCCTT | TTTTTTTTTGA | AAAGAAAAGA | AATACCCGCT | TATCCTAAAG | 880  |
| <i>P. radiata</i> (KC157129) | 801  | ATTTGATATG | GAAAAGGGTA | CAACCGAATG | TACATTCCTT | TTTTTTTTTGA | AAAGAAAAGA | AATACCCGCT | TATCCTAAAG | 880  |
| <i>P. taeda</i> (FJ899561)   | 801  | ATTTGATATG | GAAAAGGGTA | CAACCGAATG | TACATTCCTT | TTTTTTTTTGA | AAAGAAAAGA | AATACCCGCT | TATCCTAAAG | 880  |
| <i>P. taeda</i> (KY964286)   | 801  | ATTTGATATG | GAAAAGGGTA | CAACCGAATG | TACATTCCTT | TTTTTTTTTGA | AAAGAAAAGA | AATACCCGCT | TATCCTAAAG | 880  |
| <i>P. taeda</i> (KC157082)   | 801  | ATTTGATATG | GAAAAGGGTA | CAACCGAATG | TACATTCCTT | TTTTTTTTTGA | AAAGAAAAGA | AATACCCGCT | TATCCTAAAG | 880  |
| <i>P. taeda</i> (KC427273)   | 801  | ATTTGATATG | GAAAAGGGTA | CAACCGAATG | TACATTCCTT | TTTTTTTTTGA | AAAGAAAAGA | AATACCCGCT | TATCCTAAAG | 880  |
| *                            |      |            |            |            |            |             |            |            |            |      |
| <i>P. radiata</i> (JN854165) | 881  | ATTATTATGA | CACGTCCGAT | TCTGGTAGAG | TGGATAAGGA | ACAAATCGAG  | GAAGAAGTTA | GGGAAAAAAT | CCAGAAGTCG | 960  |
| <i>P. radiata</i> (KC157129) | 881  | ATTATTATGA | CACGTCCGAT | TCTGGTAGAG | TGGATAAGGA | ACAAATCGAG  | GAAGAAGTTA | GGGAAAAAAT | CCAGAAGTCG | 960  |
| <i>P. taeda</i> (FJ899561)   | 881  | ATTATTATGA | CACGTCCGAT | TCTGGTAGAG | TGGATAAGGA | ACAAATCGAG  | GAAGAAGTTA | GGGAAAAAAT | CCAGAAGTCG | 960  |
| <i>P. taeda</i> (KY964286)   | 881  | ATTATTATGA | CACGTCCGAT | TCTGGTAGAG | TGGATAAGGA | ACAAATCGAG  | GAAGAAGTTA | GGGAAAAAAT | CCAGAAGTCG | 960  |
| <i>P. taeda</i> (KC157082)   | 881  | ATTATTATGA | CACGTCCGAT | TCTGGTAGAG | TGGATAAGGA | ACAAATCGAG  | GAAGAAGTTA | GGGAAAAAAT | CCAGAAGTCG | 960  |
| <i>P. taeda</i> (KC427273)   | 881  | ATTATTATGA | CACGTCCGAT | TCTGGTAGAG | TGGATAAGGA | ACAAATCGAG  | GAAGAAGTTA | GGGAAAAAAT | CCAGAAGTCG | 960  |
| *                            |      |            |            |            |            |             |            |            |            |      |
| <i>P. radiata</i> (JN854165) | 961  | AAGATCCATT | ATCCCAGCAG | ACAATTACTG | AGTCCTTATG | TTTAACGTGG  | CCAGAATTGC | ACTATTTAAG | AAGTTTATTA | 1040 |
| <i>P. radiata</i> (KC157129) | 961  | AAGATCCATT | ATCCCAGCAG | ACAATTACTG | AGTCCTTATG | TTTAACGTGG  | CCAGAATTGC | ACTATTTAAG | AAGTTTATTA | 1040 |
| <i>P. taeda</i> (FJ899561)   | 961  | AAGATCCATT | ATCCAAGCAG | ACAATTGCTG | AGTCCTTATG | TTTAACGTGG  | CCAGAATTGC | ACTATTTAG  | AAGTTTATTA | 1040 |
| <i>P. taeda</i> (KY964286)   | 961  | AAGATCCATT | ATCCCAGCAG | ACAATTGCTG | AGTCCTTATG | TTTAACGTGG  | CCAGAATTGC | ACTATTTAG  | AAGTTTATTA | 1040 |
| <i>P. taeda</i> (KC157082)   | 961  | AAGATCCATT | ATCCCAGCAG | ACAATTGCTG | AGTCCTTATG | TTTAACGTGG  | CCAGAATTGC | ACTATTTAG  | AAGTTTATTA | 1040 |
| <i>P. taeda</i> (KC427273)   | 961  | AAGATCCATT | ATCCCAGCAG | ACAATTGCTG | AGTCCTTATG | TTTAACGTGG  | CCAGAATTGC | ACTATTTAG  | AAGTTTATTA | 1040 |
| *                            |      |            |            |            |            |             |            |            |            |      |
| <i>P. radiata</i> (JN854165) | 1041 | TTAATGGCTC | AATCAAA    | 1057       |            |             |            |            |            |      |
| <i>P. radiata</i> (KC157129) | 1041 | TTAATGGCTC | AATCAAA    | 1057       |            |             |            |            |            |      |
| <i>P. taeda</i> (FJ899561)   | 1041 | TTAATGGCTC | AATCAAA    | 1057       |            |             |            |            |            |      |
| <i>P. taeda</i> (KY964286)   | 1041 | TTAATGGCTC | AATCAAA    | 1057       |            |             |            |            |            |      |
| <i>P. taeda</i> (KC157082)   | 1041 | TTAATGGCTC | AATCAAA    | 1057       |            |             |            |            |            |      |
| <i>P. taeda</i> (KC427273)   | 1041 | TTAATGGCTC | AATCAAA    | 1057       |            |             |            |            |            |      |
