# Supplementary material
Source: MDPI journal article supplement (https://www.mdpi.com/1999-4907/14/6/1095)
Supplement: s1 [file s1]

|                              |     |            |            |            |            |            |            |            |            |            |    |
|------------------------------|-----|------------|------------|------------|------------|------------|------------|------------|------------|------------|----|
|                              |     |            |            |            |            |            |            |            |            | *          |    |
| <i>P. rigida</i> (AY724757)  | 1   | TAGTGT     | CGGA       | TTCAAAGCTG | GTGTTAAAGA | TTACAGATTA | ACTTATTATA | CTCCTGAATA | TCAGACCAAG | GATACAGATA | 80 |
| <i>P. rigida</i> (JN854163)  | 1   | TAGTGT     | CGGA       | TTCAAAGCTG | GTGTTAAAGA | TTACAGATTA | ACTTATTATA | CTCCTGAATA | TCAGACCAAG | GATACAGATA | 80 |
| <i>P. rigida</i> (JQ512589)  | 1   | TAGTGT     | CGGA       | TTCAAAGCTG | GTGTTAAAGA | TTACAGATTA | ACTTATTATA | CTCCTGAATA | TCAGACCAAG | GATACAGATA | 80 |
| <i>P. rigida</i> (JQ512587)  | 1   | TAGTGT     | CGGA       | TTCAAAGCTG | GTGTTAAAGA | TTACAGATTA | ACTTATTATA | CTCCTGAATA | TCAGACCAAG | GATACAGATA | 80 |
| <i>P. rigida</i> (MZ424450)  | 1   | TAGTGT     | CGGA       | TTCAAAGCTG | GTGTTAAAGA | TTACAGATTA | ACTTATTATA | CTCCTGAATA | TCAGACCAAG | GATACAGATA | 80 |
| <i>P. rigida</i> (NC_065459) | 1   | TAGTGT     | CGGA       | TTCAAAGCTG | GTGTTAAAGA | TTACAGATTA | ACTTATTATA | CTCCTGAATA | TCAGACCAAG | GATACAGATA | 80 |
| <i>P. taeda</i> (AF119177)   | 1   | TAGTGT     | CGGA       | TTCAAAGCTG | GTGTTAAAGA | TTACAGATTA | ACTTATTATA | CTCCTGAATA | TCAGACCAAG | GATACAGATA | 80 |
| <i>P. taeda</i> (AY724758)   | 1   | TAGTGT     | CGGA       | TTCAAAGCTG | GTGTTAAAGA | TTACAGATTA | ACTTATTATA | CTCCTGAATA | TCAGACCAAG | GATACAGATA | 80 |
| <i>P. taeda</i> (FJ899561)   | 1   | TAGTGT     | CGGA       | TTCAAAGCTG | GTGTTAAAGA | TTACAGATTA | ACTTATTATA | CTCCTGAATA | TCAGACCAAG | GATACAGATA | 80 |
| <i>P. taeda</i> (JQ512592)   | 1   | TAGTGT     | CGGA       | TTCAAAGCTG | GTGTTAAAGA | TTACAGATTA | ACTTATTATA | CTCCTGAATA | TCAGACCAAG | GATACAGATA | 80 |
| <i>P. taeda</i> (KC427273)   | 1   | TAGTGT     | CGGA       | TTCAAAGCTG | GTGTTAAAGA | TTACAGATTA | ACTTATTATA | CTCCTGAATA | TCAGACCAAG | GATACAGATA | 80 |
| <i>P. taeda</i> (KY964286)   | 1   | TAGTGT     | CGGA       | TTCAAAGCTG | GTGTTAAAGA | TTACAGATTA | ACTTATTATA | CTCCTGAATA | TCAGACCAAA | GATACAGATA | 80 |
|                              |     |            |            |            |            |            |            |            |            |            |    |
| <i>P. rigida</i> (AY724757)  | 81  | TCTTGGCAGC | ATTCCGAGTA | ACTCCTCAAC | CCGGGGTGCC | ACCTGAAGAA | GCGGGAGCAG | CAGTAGCTGC | TGAATCTTCC | 160        |    |
| <i>P. rigida</i> (JN854163)  | 81  | TCTTGGCAGC | ATTCCGAGTA | ACTCCTCAAC | CCGGGGTGCC | ACCTGAAGAA | GCGGGAGCAG | CAGTAGCTGC | TGAATCTTCC | 160        |    |
| <i>P. rigida</i> (JQ512589)  | 81  | TCTTGGCAGC | ATTCCGAGTA | ACTCCTCAAC | CCGGGGTGCC | ACCTGAAGAA | GCGGGAGCAG | CAGTAGCTGC | TGAATCTTCC | 160        |    |
| <i>P. rigida</i> (JQ512587)  | 81  | TCTTGGCAGC | ATTCCGAGTA | ACTCCTCAAC | CCGGGGTGCC | ACCTGAAGAA | GCGGGAGCAG | CAGTAGCTGC | TGAATCTTCC | 160        |    |
| <i>P. rigida</i> (MZ424450)  | 81  | TCTTGGCAGC | ATTCCGAGTA | ACTCCTCAAC | CCGGGGTGCC | ACCTGAAGAA | GCGGGAGCAG | CAGTAGCTGC | TGAATCTTCC | 160        |    |
| <i>P. rigida</i> (NC_065459) | 81  | TCTTGGCAGC | ATTCCGAGTA | ACTCCTCAAC | CCGGGGTGCC | ACCTGAAGAA | GCGGGAGCAG | CAGTAGCTGC | TGAATCTTCC | 160        |    |
| <i>P. taeda</i> (AF119177)   | 81  | TCTTGGCAGC | ATTCCGAGTA | ACTCCTCAAC | CCGGGGTGCC | ACCTGAAGAA | GCGGGAGCAG | CAGTAGCTGC | TGAATCTTCC | 160        |    |
| <i>P. taeda</i> (AY724758)   | 81  | TCTTGGCAGC | ATTCCGAGTA | ACTCCTCAAC | CCGGGGTGCC | ACCTGAAGAA | GCGGGAGCAG | CAGTAGCTGC | TGAATCTTCC | 160        |    |
| <i>P. taeda</i> (FJ899561)   | 81  | TCTTGGCAGC | ATTCCGAGTA | ACTCCTCAAC | CCGGGGTGCC | ACCTGAAGAA | GCGGGAGCAG | CAGTAGCTGC | TGAATCTTCC | 160        |    |
| <i>P. taeda</i> (JQ512592)   | 81  | TCTTGGCAGC | ATTCCGAGTA | ACTCCTCAAC | CCGGGGTGCC | ACCTGAAGAA | GCGGGAGCAG | CAGTAGCTGC | TGAATCTTCC | 160        |    |
| <i>P. taeda</i> (KC427273)   | 81  | TCTTGGCAGC | ATTCCGAGTA | ACTCCTCAAC | CCGGGGTGCC | ACCTGAAGAA | GCGGGAGCAG | CAGTAGCTGC | TGAATCTTCC | 160        |    |
| <i>P. taeda</i> (KY964286)   | 81  | TCTTGGCAGC | ATTCCGAGTA | ACTCCTCAAC | CCGGGGTGCC | ACCTGAAGAA | GCGGGAGCAG | CAGTAGCTGC | TGAATCTTCC | 160        |    |
|                              |     |            |            |            |            |            |            |            |            |            |    |
|                              |     |            |            |            |            |            |            |            |            | *          |    |
| <i>P. rigida</i> (AY724757)  | 161 | ACCGGTACAT | GGACCACTGT | TTGGACCGAT | GGACTTACTA | GTCTCGATCG | TTACAAGGGG | CGATGCTATG | ATATCGAGCC | 240        |    |
| <i>P. rigida</i> (JN854163)  | 161 | ACCGGTACAT | GGACCACTGT | TTGGACCGAT | GGACTTACTA | GTCTCGATCG | TTACAAGGGG | CGATGCTATG | ATATCGAGCC | 240        |    |
| <i>P. rigida</i> (JQ512589)  | 161 | ACCGGTACAT | GGACCACTGT | TTGGACCGAT | GGACTTACTA | GTCTCGATCG | TTACAAGGGG | CGATGCTATG | ATATCGAGCC | 240        |    |
| <i>P. rigida</i> (JQ512587)  | 161 | ACCGGTACAT | GGACCACTGT | TTGGACCGAT | GGACTTACTA | GTCTCGATCG | TTACAAGGGG | CGATGCTATG | ATATCGAGCC | 240        |    |
| <i>P. rigida</i> (MZ424450)  | 161 | ACCGGTACAT | GGACCACTGT | TTGGACCGAT | GGACTTACTA | GTCTCGATCG | TTACAAGGGG | CGATGCTATG | ATATCGAGCC | 240        |    |
| <i>P. rigida</i> (NC_065459) | 161 | ACCGGTACAT | GGACCACTGT | TTGGACCGAT | GGACTTACTA | GTCTCGATCG | TTACAAGGGG | CGATGCTATG | ATATCGAGCC | 240        |    |
| <i>P. taeda</i> (AF119177)   | 161 | ACCGGTACAT | GGACCACTGT | TTGGACCGAT | GGACTTACTA | GTCTCGATCG | TTACAAGGGG | CGATGCTATG | ATATCGAGCC | 240        |    |
| <i>P. taeda</i> (AY724758)   | 161 | ACCGGTACAT | GGACCACTGT | TTGGACCGAT | GGACTTACTA | GTCTCGATCG | TTACAAGGGG | CGATGCTATG | ATATCGAGCC | 240        |    |
| <i>P. taeda</i> (FJ899561)   | 161 | ACCGGTACAT | GGACCACTGT | TTGGACCGAT | GGACTTACTA | GTCTCGATCG | TTACAAGGGG | CGATGCTATG | ATATCGAGCC | 240        |    |
| <i>P. taeda</i> (JQ512592)   | 1   |            |            |            |            |            |            |            |            |            |    |

|                              |     |            |            |            |            |            |            |            |            |     |
|------------------------------|-----|------------|------------|------------|------------|------------|------------|------------|------------|-----|
| <i>P. rigida</i> (AY724757)  | 241 | CGTTCCTGGA | GAGGAGACTC | AATTTATTGC | CTATGTAGCT | TACCCCTTAG | ACCTTTTCGA | AGAAGGTTCT | GTTACTAACT | 320 |
| <i>P. rigida</i> (JN854163)  | 241 | CGTTCCTGGA | GAGGAGACTC | AATTTATTGC | CTATGTAGCT | TACCCCTTAG | ACCTTTTCGA | AGAAGGTTCT | GTTACTAACT | 320 |
| <i>P. rigida</i> (JQ512589)  | 241 | CGTTCCTGGA | GAGGAGACTC | AATTTATTGC | CTATGTAGCT | TACCCCTTAG | ACCTTTTCGA | AGAAGGTTCT | GTTACTAACT | 320 |
| <i>P. rigida</i> (JQ512587)  | 241 | CGTTCCTGGA | GAGGAGACTC | AATTTATTGC | CTATGTAGCT | TACCCCTTAG | ACCTTTTCGA | AGAAGGTTCT | GTTACTAACT | 320 |
| <i>P. rigida</i> (MZ424450)  | 241 | CGTTCCTGGA | GAGGAGACTC | AATTTATTGC | CTATGTAGCT | TACCCCTTAG | ACCTTTTCGA | AGAAGGTTCT | GTTACTAACT | 320 |
| <i>P. rigida</i> (NC_065459) | 241 | CGTTCCTGGA | GAGGAGACTC | AATTTATTGC | CTATGTAGCT | TACCCCTTAG | ACCTTTTCGA | AGAAGGTTCT | GTTACTAACT | 320 |
| <i>P. taeda</i> (AF119177)   | 241 | CGTTCCTGGA | GAGGAGACTC | AATTTATTGC | CTATGTAGCT | TACCCCTTAG | ACCTTTTCGA | AGAAGGTTCT | GTTACTAACT | 320 |
| <i>P. taeda</i> (AY724758)   | 241 | CGTTCCTGGA | GAGGAGACTC | AATTTATTGC | CTATGTAGCT | TACCCCTTAG | ACCTTTTCGA | AGAAGGTTCT | GTTACTAACT | 320 |
| <i>P. taeda</i> (FJ899561)   | 241 | CGTTCCTGGA | GAGGAGACTC | AATTTATTGC | CTATGTAGCT | TACCCCTTAG | ACCTTTTCGA | AGAAGGTTCT | GTTACTAACT | 320 |
| <i>P. taeda</i> (JQ512592)   | 241 | CGTTCCTGGA | GAGGAGACTC | AATTTATTGC | CTATGTAGCT | TACCCCTTAG | ACCTTTTCGA | AGAAGGTTCT | GTTACTAACT | 320 |
| <i>P. taeda</i> (KC427273)   | 241 | CGTTCCTGGA | GAGGAGACTC | AATTTATTGC | CTATGTAGCT | TACCCCTTAG | ACCTTTTCGA | AGAAGGTTCT | GTTACTAACT | 320 |
| <i>P. taeda</i> (KY964286)   | 241 | CGTTCCTGGA | GAGGAGACTC | AATTTATTGC | CTATGTAGCT | TACCCCTTAG | ACCTTTTCGA | AGAAGGTTCT | GTTACTAACT | 320 |

|                              |     |            |            |            |            |            |            |            |            |     |
|------------------------------|-----|------------|------------|------------|------------|------------|------------|------------|------------|-----|
| <i>P. rigida</i> (AY724757)  | 321 | TGTTCACTTC | CATTGTAGGT | AATGTATTTG | GATTCAAGGC | CCTACGGGCT | CTACGTTTGG | AAGATTTGCG | GATTCCCCCT | 400 |
| <i>P. rigida</i> (JN854163)  | 321 | TGTTCACTTC | CATTGTAGGT | AATGTATTTG | GATTCAAGGC | CCTACGGGCT | CTACGTTTGG | AAGATTTGCG | GATTCCCCCT | 400 |
| <i>P. rigida</i> (JQ512589)  | 321 | TGTTCACTTC | CATTGTAGGT | AATGTATTTG | GATTCAAGGC | CCTACGGGCT | CTACGTTTGG | AAGATTTGCG | GATTCCCCCT | 400 |
| <i>P. rigida</i> (JQ512587)  | 321 | TGTTCACTTC | CATTGTAGGT | AATGTATTTG | GATTCAAGGC | CCTACGGGCT | CTACGTTTGG | AAGATTTGCG | GATTCCCCCT | 400 |
| <i>P. rigida</i> (MZ424450)  | 321 | TGTTCACTTC | CATTGTAGGT | AATGTATTTG | GATTCAAGGC | CCTACGGGCT | CTACGTTTGG | AAGATTTGCG | GATTCCCCCT | 400 |
| <i>P. rigida</i> (NC_065459) | 321 | TGTTCACTTC | CATTGTAGGT | AATGTATTTG | GATTCAAGGC | CCTACGGGCT | CTACGTTTGG | AAGATTTGCG | GATTCCCCCT | 400 |
| <i>P. taeda</i> (AF119177)   | 321 | TGTTCACTTC | CATTGTAGGT | AATGTATTTG | GATTCAAGGC | CCTACGGGCT | CTACGTTTGG | AAGATTTGCG | GATTCCCCCT | 400 |
| <i>P. taeda</i> (AY724758)   | 321 | TGTTCACTTC | CATTGTAGGT | AATGTATTTG | GATTCAAGGC | CCTACGGGCT | CTACGTTTGG | AAGATTTGCG | GATTCCCCCT | 400 |
| <i>P. taeda</i> (FJ899561)   | 321 | TGTTCACTTC | CATTGTAGGT | AATGTATTTG | GATTCAAGGC | CCTACGGGCT | CTACGTTTGG | AAGATTTGCG | GATTCCCCCT | 400 |
| <i>P. taeda</i> (JQ512592)   | 321 | TGTTCACTTC | CATTGTAGGT | AATGTATTTG | GATTCAAGGC | CCTACGGGCT | CTACGTTTGG | AAGATTTGCG | GATTCCCCCT | 400 |
| <i>P. taeda</i> (KC427273)   | 321 | TGTTCACTTC | CATTGTAGGT | AATGTATTTG | GATTCAAGGC | CCTACGGGCT | CTACGTTTGG | AAGATTTGCG | GATTCCCCCT | 400 |
| <i>P. taeda</i> (KY964286)   | 321 | TGTTCACTTC | CATTGTAGGT | AATGTATTTG | GATTCAAGGC | CCTACGGGCT | CTACGTTTGG | AAGATTTGCG | GATTCCCCCT | 400 |

|                              |     |            |            |            |            |            |            |            |            |     |
|------------------------------|-----|------------|------------|------------|------------|------------|------------|------------|------------|-----|
| <i>P. rigida</i> (AY724757)  | 401 | GCTTATTCCA | AAACTTTTCA | GGGTCCACCT | CATGGTATCC | AGGTTGAAAG | AGATAAATTG | AACAAATATG | GTCGTCCTTT | 480 |
| <i>P. rigida</i> (JN854163)  | 401 | GCTTATTCCA | AAACTTTTCA | GGGTCCACCT | CATGGTATCC | AGGTTGAAAG | AGATAAATTG | AACAAATATG | GTCGTCCTTT | 480 |
| <i>P. rigida</i> (JQ512589)  | 401 | GCTTATTCCA | AAACTTTTCA | GGGTCCACCT | CATGGTATCC | AGGTTGAAAG | AGATAAATTG | AACAAATATG | GTCGTCCTTT | 480 |
| <i>P. rigida</i> (JQ512587)  | 401 | GCTTATTCCA | AAACTTTTCA | GGGTCCACCT | CATGGTATCC | AGGTTGAAAG | AGATAAATTG | AACAAATATG | GTCGTCCTTT | 480 |
| <i>P. rigida</i> (MZ424450)  | 401 | GCTTATTCCA | AAACTTTTCA | GGGTCCACCT | CATGGTATCC | AGGTTGAAAG | AGATAAATTG | AACAAATATG | GTCGTCCTTT | 480 |
| <i>P. rigida</i> (NC_065459) | 401 | GCTTATTCCA | AAACTTTTCA | GGGTCCACCT | CATGGTATCC | AGGTTGAAAG | AGATAAATTG | AACAAATATG | GTCGTCCTTT | 480 |
| <i>P. taeda</i> (AF119177)   | 401 | GCTTATTCCA | AAACTTTTCA | GGGTCCACCT | CATGGTATCC | AGGTTGAAAG | AGATAAATTG | AACAAATATG | GTCGTCCTTT | 480 |
| <i>P. taeda</i> (AY724758)   | 401 | GCTTATTCCA | AAACTTTTCA | GGGTCCACCT | CATGGTATCC | AGGTTGAAAG | AGATAAATTG | AACAAATATG | GTCGTCCTTT | 480 |
| <i>P. taeda</i> (FJ899561)   | 401 | GCTTATTCCA | AAACTTTTCA | GGGTCCACCT | CATGGTATCC | AGGTTGAAAG | AGATAAATTG | AACAAATATG | GTCGTCCTTT | 480 |
| <i>P. taeda</i> (JQ512592)   | 401 | GCTTATTCCA | AAACTTTTCA | GGGTCCACCT | CATGGTATCC | AGGTTGAAAG | AGATAAATTG | AACAAATATG | GTCGTCCTTT | 480 |
| <i>P. taeda</i> (KC427273)   | 401 | GCTTATTCCA | AAACTTTTCA | GGGTCCACCT | CATGGTATCC | AGGTTGAAAG | AGATAAATTG | AACAAATATG | GTCGTCCTTT | 480 |
| <i>P. taeda</i> (KY964286)   | 401 | TCTTATTCCA | AAACTTTTCA | GGGTCCACCT | CATGGTATCC | AAGTTGAAAG | AGATAAATTG | AACAAATATG | GTCGTCCTTT | 480 |

|                              |     |            |            |            |            |            |            |            |            |     |
|------------------------------|-----|------------|------------|------------|------------|------------|------------|------------|------------|-----|
| <i>P. rigida</i> (AY724757)  | 481 | ATTGGGATGT | ACTATCAAAC | CAAAATTGGG | TCTATCAGCC | AAAAACTATG | GTAGAGCAGT | TTACGAATGT | CTCCGTGGTG | 560 |
| <i>P. rigida</i> (JN854163)  | 481 | ATTGGGATGT | ACTATCAAAC | CAAAATTGGG | TCTATCAGCC | AAAAACTATG | GTAGAGCAGT | TTACGAATGT | CTCCGTGGTG | 560 |
| <i>P. rigida</i> (JQ512589)  | 481 | ATTGGGATGT | ACTATCAAAC | CAAAATTGGG | TCTATCAGCC | AAAAACTATG | GTAGAGCAGT | TTACGAATGT | CTCCGTGGTG | 560 |
| <i>P. rigida</i> (JQ512587)  | 481 | ATTGGGATGT | ACTATCAAAC | CAAAATTGGG | TCTATCAGCC | AAAAACTATG | GTAGAGCAGT | TTACGAATGT | CTCCGTGGTG | 560 |
| <i>P. rigida</i> (MZ424450)  | 481 | ATTGGGATGT | ACTATCAAAC | CAAAATTGGG | TCTATCAGCC | AAAAACTATG | GTAGAGCAGT | TTACGAATGT | CTCCGTGGTG | 560 |
| <i>P. rigida</i> (NC_065459) | 481 | ATTGGGATGT | ACTATCAAAC | CAAAATTGGG | TCTATCAGCC | AAAAACTATG | GTAGAGCAGT | TTACGAATGT | CTCCGTGGTG | 560 |
| <i>P. taeda</i> (AF119177)   | 481 | ATTGGGATGT | ACTATCAAAC | CAAAATTGGG | TCTATCAGCC | AAAAACTATG | GTAGAGCAGT | TTACGAATGT | CTCCGTGGTG | 560 |
| <i>P. taeda</i> (AY724758)   | 481 | ATTGGGATGT | ACTATCAAAC | CAAAATTGGG | TCTATCAGCC | AAAAACTATG | GTAGAGCAGT | TTACGAATGT | CTCCGTGGTG | 560 |
| <i>P. taeda</i> (FJ899561)   | 481 | ATTGGGATGT | ACTATCAAAC | CAAAATTGGG | TCTATCAGCC | AAAAACTATG | GTAGAGCAGT | TTACGAATGT | CTCCGTGGTG | 560 |
| <i>P. taeda</i> (JQ512592)   | 481 | ATTGGGATGT | ACTATCAAAC | CAAAATTGGG | TCTATCAGCC | AAAAACTATG | GTAGAGCAGT | TTACGAATGT | CTCCGTGGTG | 560 |
| <i>P. taeda</i> (KC427273)   | 481 | ATTGGGATGT | ACTATCAAAC | CAAAATTGGG | TCTATCAGCC | AAAAACTATG | GTAGAGCAGT | TTACGAATGT | CTCCGTGGTG | 560 |
| <i>P. taeda</i> (KY964286)   | 481 | ATTGGGATGT | ACTATCAAAC | CAAAATTGGG | TCTATCAGCC | AAAAACTATG | GTAGAGCAGT | TTACGAATGT | CTCCGTGGTG | 560 |

|                              |     |            |            |            |            |             |            |            |            |     |
|------------------------------|-----|------------|------------|------------|------------|-------------|------------|------------|------------|-----|
| <i>P. rigida</i> (AY724757)  | 561 | GACTCGATTT | TACTAAGGAT | GATGAGAACG | TAAATTCCCA | ACCATTTCATG | CGCTGGAGAG | ATCGTTTTGT | CTTTTGTGCG | 640 |
| <i>P. rigida</i> (JN854163)  | 561 | GACTCGATTT | TACTAAGGAT | GATGAGAACG | TAAATTCCCA | ACCATTTCATG | CGCTGGAGAG | ATCGTTTTGT | CTTTTGTGCG | 640 |
| <i>P. rigida</i> (JQ512589)  | 561 | GACTCGATTT | TACTAAGGAT | GATGAGAACG | TAAATTCCCA | ACCATTTCATG | CGCTGGAGAG | ATCGTTTTGT | CTTTTGTGCG | 640 |
| <i>P. rigida</i> (JQ512587)  | 561 | GACTCGATTT | TACTAAGGAT | GATGAGAACG | TAAATTCCCA | ACCATTTCATG | CGCTGGAGAG | ATCGTTTTGT | CTTTTGTGCG | 640 |
| <i>P. rigida</i> (MZ424450)  | 561 | GACTCGATTT | TACTAAGGAT | GATGAGAACG | TAAATTCCCA | ACCATTTCATG | CGCTGGAGAG | ATCGTTTTGT | CTTTTGTGCG | 640 |
| <i>P. rigida</i> (NC_065459) | 561 | GACTCGATTT | TACTAAGGAT | GATGAGAACG | TAAATTCCCA | ACCATTTCATG | CGCTGGAGAG | ATCGTTTTGT | CTTTTGTGCG | 640 |
| <i>P. taeda</i> (AF119177)   | 561 | GACTCGATTT | TACTAAGGAT | GATGAGAACG | TAAATTCCCA | ACCATTTCATG | CGCTGGAGAG | ATCGTTTTGT | CTTTTGTGCG | 640 |
| <i>P. taeda</i> (AY724758)   | 561 | GACTCGATTT | TACTAAGGAT | GATGAGAACG | TAAATTCCCA | ACCATTTCATG | CGCTGGAGAG | ATCGTTTTGT | CTTTTGTGCG | 640 |
| <i>P. taeda</i> (FJ899561)   | 561 | GACTCGATTT | TACTAAGGAT | GATGAGAACG | TAAATTCCCA | ACCATTTCATG | CGCTGGAGAG | ATCGTTTTGT | CTTTTGTGCG | 640 |
| <i>P. taeda</i> (JQ512592)   | 561 | GACTCGATTT | TACTAAGGAT | GATGAGAACG | TAAATTCCCA | ACCATTTCATG | CGCTGGAGAG | ATCGTTTTGT | CTTTTGTGCG | 640 |
| <i>P. taeda</i> (KC427273)   | 561 | GACTCGATTT | TACTAAGGAT | GATGAGAACG | TAAATTCCCA | ACCATTTCATG | CGCTGGAGAG | ATCGTTTTGT | CTTTTGTGCG | 640 |
| <i>P. taeda</i> (KY964286)   | 561 | GACTCGATTT | TACTAAGGAT | GATGAGAACG | TAAATTCCCA | ACCATTTCATG | CGCTGGAGAG | ATCGTTTTGT | CTTTTGTGCG | 640 |

★

|                              |     |            |            |            |            |            |            |            |            |     |
|------------------------------|-----|------------|------------|------------|------------|------------|------------|------------|------------|-----|
| <i>P. rigida</i> (AY724757)  | 641 | GAAGCAATTT | ATAAGGCTCA | GGCTGAGACG | GGTGAAATTA | AGGGACATTA | TTTGAATGCT | ACTGCAGGTA | CATGTGAAGA | 720 |
| <i>P. rigida</i> (JN854163)  | 641 | GAAGCAATTT | ATAAGGCTCA | GGCTGAGACG | GGTGAAATTA | AGGGACATTA | TTTGAATGCT | ACTGCAGGTA | CATGTGAAGA | 720 |
| <i>P. rigida</i> (JQ512589)  | 641 | GAAGCAATTT | ATAAGGCTCA | GGCTGAGACG | GGTGAAATTA | AGGGACATTA | TTTGAATGCT | ACTGCAGGTA | CATGTGAAGA | 720 |
| <i>P. rigida</i> (JQ512587)  | 641 | GAAGCAATTT | ATAAGGCTCA | GGCTGAGACG | GGTGAAATTA | AGGGACATTA | TTTGAATGCT | ACTGCAGGTA | CATGTGAAGA | 720 |
| <i>P. rigida</i> (MZ424450)  | 641 | GAAGCAATTT | ATAAGGCTCA | GGCTGAGACG | GGTGAAATTA | AGGGACATTA | TTTGAATGCT | ACTGCAGGTA | CATGTGAAGA | 720 |
| <i>P. rigida</i> (NC_065459) | 641 | GAAGCAATTT | ATAAGGCTCA | GGCTGAGACG | GGTGAAATTA | AGGGACATTA | TTTGAATGCT | ACTGCAGGTA | CATGTGAAGA | 720 |
| <i>P. taeda</i> (AF119177)   | 641 | GAAGCAATTT | ATAAGGCTCA | GGCTGAGACG | GGTGAAATTA | AGGGACATTA | TTTGAATGCT | ACTGCAGGTA | CATGTGAAGA | 720 |
| <i>P. taeda</i> (AY724758)   | 641 | GAAGCAATTT | ATAAGGCTCA | GGCTGAGACG | GGTGAAATTA | AGGGACATTA | TTTGAATGCT | ACTGCAGGTA | CATGTGAAGA | 720 |
| <i>P. taeda</i> (FJ899561)   | 641 | GAAGCAATTT | ATAAGGCTCA | GGCTGAGACG | GGTGAAATTA | AGGGACATTA | TTTGAATGCT | ACTGCAGGTA | CATGTGAAGA | 720 |
| <i>P. taeda</i> (JQ512592)   | 641 | GAAGCAATTT | ATAAGGCTCA | GGCTGAGACG | GGTGAAATTA | AGGGACATTA | TTTGAATGCT | ACTGCAGGTA | CATGTGAAGA | 720 |
| <i>P. taeda</i> (KC427273)   | 641 | GAAGCAATTT | ATAAGGCTCA | GGCTGAGACG | GGTGAAATTA | AGGGACATTA | TTTGAATGCT | ACTGCAGGTA | CATGTGAAGA | 720 |
| <i>P. taeda</i> (KY964286)   | 641 | GAAGCAATTT | ATAAGGCTCA | GGCTGAGACG | GGTGAAATTA | AGGGACATTA | TTTGAATGCT | ACTGCAGGTA | CATGTGAAGA | 720 |

|                              |     |            |            |            |            |            |            |            |            |     |  |  |
|------------------------------|-----|------------|------------|------------|------------|------------|------------|------------|------------|-----|--|--|
|                              |     |            | *          |            |            |            |            | *          |            |     |  |  |
| <i>P. rigida</i> (AY724757)  | 721 | AATGATGAAA | AGGGCAATAT | TTGCAAGAGA | ATTGGGAGTT | CCTATCGTTA | TGCATGACTA | TCTGACGGGA | GGTTTTACCG | 800 |  |  |
| <i>P. rigida</i> (JN854163)  | 721 | AATGATGAAA | AGGGCAATAT | TTGCAAGAGA | ATTGGGAGTT | CCTATCGTTA | TGCATGACTA | TCTGACGGGA | GGTTTTACCG | 800 |  |  |
| <i>P. rigida</i> (JQ512589)  | 721 | AATGATGAAA | AGGGCAATAT | TTGCAAGAGA | ATTGGGAGTT | CCTATCGTTA | TGCATGACTA | TCTGACGGGA | GGTTTTACCG | 800 |  |  |
| <i>P. rigida</i> (JQ512587)  | 721 | AATGATGAAA | AGGGCAATAT | TTGCAAGAGA | ATTGGGAGTT | CCTATCGTTA | TGCATGACTA | TCTGACGGGA | GGTTTTACCG | 800 |  |  |
| <i>P. rigida</i> (MZ424450)  | 721 | AATGATGAAA | AGGGCAATAT | TTGCAAGAGA | ATTGGGAGTT | CCTATCGTTA | TGCATGACTA | TCTGACGGGA | GGTTTTACCG | 800 |  |  |
| <i>P. rigida</i> (NC_065459) | 721 | AATGATGAAA | AGGGCAATAT | TTGCAAGAGA | ATTGGGAGTT | CCTATCGTTA | TGCATGACTA | TCTGACGGGA | GGTTTTACCG | 800 |  |  |
| <i>P. taeda</i> (AF119177)   | 721 | AATGATGAAA | AGGGCAATAC | TTGCAAGAGA | ATTGGGAGTT | CCTATCGTTA | TGCATGACTA | TCTGACGGGA | GGTTTTACCG | 800 |  |  |
| <i>P. taeda</i> (AY724758)   | 721 | AATGATGAAA | AGGGCAATAT | TTGCAAGAGA | ATTGGGAGTT | CCTATCGTTA | TGCATGACTA | TCTGACGGGA | GGTTTTACCG | 800 |  |  |
| <i>P. taeda</i> (FJ899561)   | 721 | AATGATGAAA | AGGGCAATAT | TTGCAAGAGA | ATTGGGAGTT | CCTATCGTTA | TGCATGACTA | TCTGACGGGA | GGTTTTACCG | 800 |  |  |
| <i>P. taeda</i> (JQ512592)   | 721 | AATGATGAAA | AGGGCAATAT | TTGCAAGAGA | ATTGGGAGTT | CCTATCGTTA | TGCATGACTA | TCTGACGGGA | GGTTTTACCG | 800 |  |  |
| <i>P. taeda</i> (KC427273)   | 721 | AATGATGAAA | AGGGCAATAT | TTGCAAGAGA | ATTGGGAGTT | CCTATCGTTA | TGCATGACTA | TCTGACGGGA | GGTTTTACCG | 800 |  |  |
| <i>P. taeda</i> (KY964286)   | 721 | AATGATGAAA | AGGGCAATAT | TTGCAAGAGA | ATTGGGAGTT | CCTATCGTTA | TGCATGACTA | CCTGACGGGA | GGTTTTACCG | 800 |  |  |

|                              |     |            |            |            |            |            |            |            |            |     |  |  |
|------------------------------|-----|------------|------------|------------|------------|------------|------------|------------|------------|-----|--|--|
| <i>P. rigida</i> (AY724757)  | 801 | CAAATACTTC | TTTGGCTCAT | TATTGCCGAG | ACAACGGCCT | ACTTCTTCAC | ATTCACCGCG | CGATGCATGC | AGTTATTGAC | 880 |  |  |
| <i>P. rigida</i> (JN854163)  | 801 | CAAATACTTC | TTTGGCTCAT | TATTGCCGAG | ACAACGGCCT | ACTTCTTCAC | ATTCACCGCG | CGATGCATGC | AGTTATTGAC | 880 |  |  |
| <i>P. rigida</i> (JQ512589)  | 801 | CAAATACTTC | TTTGGCTCAT | TATTGCCGAG | ACAACGGCCT | ACTTCTTCAC | ATTCACCGCG | CGATGCATGC | AGTTATTGAC | 880 |  |  |
| <i>P. rigida</i> (JQ512587)  | 801 | CAAATACTTC | TTTGGCTCAT | TATTGCCGAG | ACAACGGCCT | ACTTCTTCAC | ATTCACCGCG | CGATGCATGC | AGTTATTGAC | 880 |  |  |
| <i>P. rigida</i> (MZ424450)  | 801 | CAAATACTTC | TTTGGCTCAT | TATTGCCGAG | ACAACGGCCT | ACTTCTTCAC | ATTCACCGCG | CGATGCATGC | AGTTATTGAC | 880 |  |  |
| <i>P. rigida</i> (NC_065459) | 801 | CAAATACTTC | TTTGGCTCAT | TATTGCCGAG | ACAACGGCCT | ACTTCTTCAC | ATTCACCGCG | CGATGCATGC | AGTTATTGAC | 880 |  |  |
| <i>P. taeda</i> (AF119177)   | 801 | CAAATACTTC | TTTGGCTCAT | TATTGCCGAG | ACAACGGCCT | ACTTCTTCAC | ATTCACCGCG | CGATGCATGC | AGTTATTGAC | 880 |  |  |
| <i>P. taeda</i> (AY724758)   | 801 | CAAATACTTC | TTTGGCTCAT | TATTGCCGAG | ACAACGGCCT | ACTTCTTCAC | ATTCACCGCG | CGATGCATGC | AGTTATTGAC | 880 |  |  |
| <i>P. taeda</i> (FJ899561)   | 801 | CAAATACTTC | TTTGGCTCAT | TATTGCCGAG | ACAACGGCCT | ACTTCTTCAC | ATTCACCGCG | CGATGCATGC | AGTTATTGAC | 880 |  |  |
| <i>P. taeda</i> (JQ512592)   | 801 | CAAATACTTC | TTTGGCTCAT | TATTGCCGAG | ACAACGGCCT | ACTTCTTCAC | ATTCACCGCG | CGATGCATGC | AGTTATTGAC | 880 |  |  |
| <i>P. taeda</i> (KC427273)   | 801 | CAAATACTTC | TTTGGCTCAT | TATTGCCGAG | ACAACGGCCT | ACTTCTTCAC | ATTCACCGCG | CGATGCATGC | AGTTATTGAC | 880 |  |  |
| <i>P. taeda</i> (KY964286)   | 801 | CAAATACTTC | TTTGGCTCAT | TATTGCCGAG | ACAACGGCCT | ACTTCTTCAC | ATTCACCGCG | CGATGCATGC | AGTTATTGAC | 880 |  |  |

|                              |     |            |            |            |             |            |            |            |            |     |  |  |
|------------------------------|-----|------------|------------|------------|-------------|------------|------------|------------|------------|-----|--|--|
|                              |     |            | *          |            |             |            |            |            |            |     |  |  |
| <i>P. rigida</i> (AY724757)  | 881 | AGACAAAGAA | TTCATGGTAT | GCATTTCCGG | GTA CTGGCTA | AAGCATTGCG | TATGTCCGGT | GGAGATCATA | TTCACGCCGG | 960 |  |  |
| <i>P. rigida</i> (JN854163)  | 881 | AGACAAAGAA | TTCATGGTAT | GCATTTCCGG | GTA CTGGCTA | AAGCATTGCG | TATGTCCGGT | GGAGATCATA | TTCACGCCGG | 960 |  |  |
| <i>P. rigida</i> (JQ512589)  | 881 | AGACAAAGAA | TTCATGGTAT | GCATTTCCGG | GTA CTGGCTA | AAGCATTGCG | TATGTCCGGT | GGAGATCATA | TTCACGCCGG | 960 |  |  |
| <i>P. rigida</i> (JQ512587)  | 881 | AGACAAAGAA | TTCATGGTAT | GCATTTCCGG | GTA CTGGCTA | AAGCATTGCG | TATGTCCGGT | GGAGATCATA | TTCACGCCGG | 960 |  |  |
| <i>P. rigida</i> (MZ424450)  | 881 | AGACAAAGAA | TTCATGGTAT | GCATTTCCGG | GTA CTGGCTA | AAGCATTGCG | TATGTCCGGT | GGAGATCATA | TTCACGCCGG | 960 |  |  |
| <i>P. rigida</i> (NC_065459) | 881 | AGACAAAGAA | TTCATGGTAT | GCATTTCCGG | GTA CTGGCTA | AAGCATTGCG | TATGTCCGGT | GGAGATCATA | TTCACGCCGG | 960 |  |  |
| <i>P. taeda</i> (AF119177)   | 881 | AGACAAAGAA | TTCATGGTAT | GCATTTCCGG | GTA CTGGCTA | AAGCATTGCG | TATGTCCGGT | GGAGATCATA | TTCACGCCGG | 960 |  |  |
| <i>P. taeda</i> (AY724758)   | 881 | AGACAAAGAA | TTCATGGTAT | GCATTTCCGG | GTA CTGGCTA | AAGCATTGCG | TATGTCCGGT | GGAGATCATA | TTCACGCCGG | 960 |  |  |
| <i>P. taeda</i> (FJ899561)   | 881 | AGACAAAGAA | TTCATGGTAT | GCATTTCCGG | GTA CTGGCTA | AAGCATTGCG | TATGTCCGGT | GGAGATCATA | TTCACGCCGG | 960 |  |  |
| <i>P. taeda</i> (JQ512592)   | 881 | AGACAAAGAA | TTCATGGTAT | GCATTTCCGG | GTA CTGGCTA | AAGCATTGCG | TATGTCCGGT | GGAGATCATA | TTCACGCCGG | 960 |  |  |
| <i>P. taeda</i> (KC427273)   | 881 | AGACAAAGAA | TTCATGGTAT | GCATTTCCGG | GTA CTGGCTA | AAGCATTGCG | TATGTCCGGT | GGAGATCATA | TTCACGCCGG | 960 |  |  |
| <i>P. taeda</i> (KY964286)   | 881 | AGACAAAGAA | ATCATGGTAT | GCATTTCCGG | GTA CTGGCTA | AAGCATTGCG | TATGTCCGGT | GGAGATCATA | TTCACGCCGG | 960 |  |  |

|                              |     |            |            |            |           |            |            |            |            |      |
|------------------------------|-----|------------|------------|------------|-----------|------------|------------|------------|------------|------|
| <i>P. rigida</i> (AY724757)  | 961 | TACTGTAGTA | GGTAAACTTG | AAGGGGAACG | AGACGTAAC | TTAGGGTTTG | TTGATCTACT | GCGTGATGAT | TTTATCGAAA | 1040 |
| <i>P. rigida</i> (JN854163)  | 961 | TACTGTAGTA | GGTAAACTTG | AAGGGGAACG | AGACGTAAC | TTAGGGTTTG | TTGATCTACT | GCGTGATGAT | TTTATCGAAA | 1040 |
| <i>P. rigida</i> (JQ512589)  | 961 | TACTGTAGTA | GGTAAACTTG | AAGGGGAACG | AGACGTAAC | TTAGGGTTTG | TTGATCTACT | GCGTGATGAT | TTTATCGAAA | 1040 |
| <i>P. rigida</i> (JQ512587)  | 961 | TACTGTAGTA | GGTAAACTTG | AAGGGGAACG | AGACGTAAC | TTAGGGTTTG | TTGATCTACT | GCGTGATGAT | TTTATCGAAA | 1040 |
| <i>P. rigida</i> (MZ424450)  | 961 | TACTGTAGTA | GGTAAACTTG | AAGGGGAACG | AGACGTAAC | TTAGGGTTTG | TTGATCTACT | GCGTGATGAT | TTTATCGAAA | 1040 |
| <i>P. rigida</i> (NC_065459) | 961 | TACTGTAGTA | GGTAAACTTG | AAGGGGAACG | AGACGTAAC | TTAGGGTTTG | TTGATCTACT | GCGTGATGAT | TTTATCGAAA | 1040 |
| <i>P. taeda</i> (AF119177)   | 961 | TACTGTAGTA | GGTAAACTTG | AAGGGGAACG | AGACGTAAC | TTAGGGTTTG | TTGATCTACT | GCGTGATGAT | TTTATCGAAA | 1040 |
| <i>P. taeda</i> (AY724758)   | 961 | TACTGTAGTA | GGTAAACTTG | AAGGGGAACG | AGACGTAAC | TTAGGGTTTG | TTGATCTACT | GCGTGATGAT | TTTATCGAAA | 1040 |
| <i>P. taeda</i> (FJ899561)   | 961 | TACTGTAGTA | GGTAAACTTG | AAGGGGAACG | AGACGTAAC | TTAGGGTTTG | TTGATCTACT | GCGTGATGAT | TTTATCGAAA | 1040 |
| <i>P. taeda</i> (JQ512592)   | 961 | TACTGTAGTA | GGTAAACTTG | AAGGGGAACG | AGACGTAAC | TTAGGGTTTG | TTGATCTACT | GCGTGATGAT | TTTATCGAAA | 1040 |
| <i>P. taeda</i> (KC427273)   | 961 | TACTGTAGTA | GGTAAACTTG | AAGGGGAACG | AGACGTAAC | TTAGGGTTTG | TTGATCTACT | GCGTGATGAT | TTTATCGAAA | 1040 |
| <i>P. taeda</i> (KY964286)   | 961 | TACTGTAGTA | GGTAAACTTG | AAGGGGAACG | AGACGTAAC | TTAGGGTTTG | TTGATCTACT | GCGTGATGAT | TTTATCGAAA | 1040 |

|                              |      |            |            |            |            |            |            |            |            |      |
|------------------------------|------|------------|------------|------------|------------|------------|------------|------------|------------|------|
| <i>P. rigida</i> (AY724757)  | 1041 | AAGATCGAAG | TCGTGGTATT | TACTTCACTC | AAGATTGGGT | ATCTATGCCA | GGTGTCTGCC | CGTAGCTTCA | GGAGGTATTC | 1120 |
| <i>P. rigida</i> (JN854163)  | 1041 | AAGATCGAAG | TCGTGGTATT | TACTTCACTC | AAGATTGGGT | ATCTATGCCA | GGTGTCTGCC | CGTAGCTTCA | GGAGGTATTC | 1120 |
| <i>P. rigida</i> (JQ512589)  | 1041 | AAGATCGAAG | TCGTGGTATT | TACTTCACTC | AAGATTGGGT | ATCTATGCCA | GGTGTCTGCC | CGTAGCTTCA | GGAGGTATTC | 1120 |
| <i>P. rigida</i> (JQ512587)  | 1041 | AAGATCGAAG | TCGTGGTATT | TACTTCACTC | AAGATTGGGT | ATCTATGCCA | GGTGTCTGCC | CGTAGCTTCA | GGAGGTATTC | 1120 |
| <i>P. rigida</i> (MZ424450)  | 1041 | AAGATCGAAG | TCGTGGTATT | TACTTCACTC | AAGATTGGGT | ATCTATGCCA | GGTGTCTGCC | CGTAGCTTCA | GGAGGTATTC | 1120 |
| <i>P. rigida</i> (NC_065459) | 1041 | AAGATCGAAG | TCGTGGTATT | TACTTCACTC | AAGATTGGGT | ATCTATGCCA | GGTGTCTGCC | CGTAGCTTCA | GGAGGTATTC | 1120 |
| <i>P. taeda</i> (AF119177)   | 1041 | AAGATCGAAG | TCGTGGTATT | TACTTCACTC | AAGATTGGGT | ATCTATGCCA | GGTGTCTGCC | CGTAGCTTCA | GGAGGTATTC | 1120 |
| <i>P. taeda</i> (AY724758)   | 1041 | AAGATCGAAG | TCGTGGTATT | TACTTCACTC | AAGATTGGGT | ATCTATGCCA | GGTGTCTGCC | CGTAGCTTCA | GGAGGTATTC | 1120 |
| <i>P. taeda</i> (FJ899561)   | 1041 | AAGATCGAAG | TCGTGGTATT | TACTTCACTC | AAGATTGGGT | ATCTATGCCA | GGTGTCTGCC | CGTAGCTTCA | GGAGGTATTC | 1120 |
| <i>P. taeda</i> (JQ512592)   | 1041 | AAGATCGAAG | TCGTGGTATT | TACTTCACTC | AAGATTGGGT | ATCTATGCCA | GGTGTCTGCC | CGTAGCTTCA | GGAGGTATTC | 1120 |
| <i>P. taeda</i> (KC427273)   | 1041 | AAGATCGAAG | TCGTGGTATT | TACTTCACTC | AAGATTGGGT | ATCTATGCCA | GGTGTCTGCC | CGTAGCTTCA | GGAGGTATTC | 1120 |
| <i>P. taeda</i> (KY964286)   | 1041 | AAGATCGAAG | TCGTGGTATT | TACTTCACTC | AAGATTGGGT | ATCTATGCCA | GGTGTCTGCC | CGTAGCTTCA | GGAGGTATTC | 1120 |

|                              |      |            |            |            |            |            |            |            |            |      |
|------------------------------|------|------------|------------|------------|------------|------------|------------|------------|------------|------|
| <i>P. rigida</i> (AY724757)  | 1121 | ACGTTTGGCA | TATGCCTGCT | CTGACCGAGA | TCTTTGGGGA | TGATTCCGTA | CTACAGTTTG | GTGGGGGAAC | TTTGGGACAT | 1200 |
| <i>P. rigida</i> (JN854163)  | 1121 | ACGTTTGGCA | TATGCCTGCT | CTGACCGAGA | TCTTTGGGGA | TGATTCCGTA | CTACAGTTTG | GTGGGGGAAC | TTTGGGACAT | 1200 |
| <i>P. rigida</i> (JQ512589)  | 1121 | ACGTTTGGCA | TATGCCTGCT | CTGACCGAGA | TCTTTGGGGA | TGATTCCGTA | CTACAGTTTG | GTGGGGGAAC | TTTGGGACAT | 1200 |
| <i>P. rigida</i> (JQ512587)  | 1121 | ACGTTTGGCA | TATGCCTGCT | CTGACCGAGA | TCTTTGGGGA | TGATTCCGTA | CTACAGTTTG | GTGGGGGAAC | TTTGGGACAT | 1200 |
| <i>P. rigida</i> (MZ424450)  | 1121 | ACGTTTGGCA | TATGCCTGCT | CTGACCGAGA | TCTTTGGGGA | TGATTCCGTA | CTACAGTTTG | GTGGGGGAAC | TTTGGGACAT | 1200 |
| <i>P. rigida</i> (NC_065459) | 1121 | ACGTTTGGCA | TATGCCTGCT | CTGACCGAGA | TCTTTGGGGA | TGATTCCGTA | CTACAGTTTG | GTGGGGGAAC | TTTGGGACAT | 1200 |
| <i>P. taeda</i> (AF119177)   | 1121 | ACGTTTGGCA | TATGCCTGCT | CTGACCGAGA | TCTTTGGGGA | TGATTCCGTA | CTACAGTTTG | GTGGGGGAAC | TTTGGGACAT | 1200 |
| <i>P. taeda</i> (AY724758)   | 1121 | ACGTTTGGCA | TATGCCTGCT | CTGACCGAGA | TCTTTGGGGA | TGATTCCGTA | CTACAGTTTG | GTGGGGGAAC | TTTGGGACAT | 1200 |
| <i>P. taeda</i> (FJ899561)   | 1121 | ACGTTTGGCA | TATGCCTGCT | CTGACCGAGA | TCTTTGGGGA | TGATTCCGTA | CTACAGTTTG | GTGGGGGAAC | TTTGGGACAT | 1200 |
| <i>P. taeda</i> (JQ512592)   | 1121 | ACGTTTGGCA | TATGCCTGCT | CTGACCGAGA | TCTTTGGGGA | TGATTCCGTA | CTACAGTTTG | GTGGGGGAAC | TTTGGGACAT | 1200 |
| <i>P. taeda</i> (KC427273)   | 1121 | ACGTTTGGCA | TATGCCTGCT | CTGACCGAGA | TCTTTGGGGA | TGATTCCGTA | CTACAGTTTG | GTGGGGGAAC | TTTGGGACAT | 1200 |
| <i>P. taeda</i> (KY964286)   | 1121 | ACGTTTGGCA | TATGCCTGCT | CTGACCGAGA | TCTTTGGGGA | TGATTCCGTA | CTACAGTTTG | GTGGGGGAAC | TTTGGGACAT | 1200 |

|                              |      |            |            |            |            |            |            |            |            |      |
|------------------------------|------|------------|------------|------------|------------|------------|------------|------------|------------|------|
| <i>P. rigida</i> (AY724757)  | 1201 | CCTTGGGGAA | ATGCACCTGG | TGCAGTAGCT | AATCGGGTTG | CTCTAGAAGC | TTGTGTACAA | GCTCGTAATG | AAGGACGTGA | 1280 |
| <i>P. rigida</i> (JN854163)  | 1201 | CCTTGGGGAA | ATGCACCTGG | TGCAGTAGCT | AATCGGGTTG | CTCTAGAAGC | TTGTGTACAA | GCTCGTAATG | AAGGACGTGA | 1280 |
| <i>P. rigida</i> (JQ512589)  | 1201 | CCTTGGGGAA | ATGCACCTGG | TGCAGTAGCT | AATCGGGTTG | CTCTAGAAGC | TTGTGTACAA | GCTCGTAATG | AAGGACGTGA | 1280 |
| <i>P. rigida</i> (JQ512587)  | 1201 | CCTTGGGGAA | ATGCACCTGG | TGCAGTAGCT | AATCGGGTTG | CTCTAGAAGC | TTGTGTACAA | GCTCGTAATG | AAGGACGTGA | 1280 |
| <i>P. rigida</i> (MZ424450)  | 1201 | CCTTGGGGAA | ATGCACCTGG | TGCAGTAGCT | AATCGGGTTG | CTCTAGAAGC | TTGTGTACAA | GCTCGTAATG | AAGGACGTGA | 1280 |
| <i>P. rigida</i> (NC_065459) | 1201 | CCTTGGGGAA | ATGCACCTGG | TGCAGTAGCT | AATCGGGTTG | CTCTAGAAGC | TTGTGTACAA | GCTCGTAATG | AAGGACGTGA | 1280 |
| <i>P. taeda</i> (AF119177)   | 1201 | CCTTGGGGAA | ATGCACCTGG | TGCAGTAGCT | AATCGGGTTG | CTCTAGAAGC | TTGTGTACAA | GCTCGTAATG | AAGGACGTGA | 1280 |
| <i>P. taeda</i> (AY724758)   | 1201 | CCTTGGGGAA | ATGCACCTGG | TGCAGTAGCT | AATCGGGTTG | CTCTAGAAGC | TTGTGTACAA | GCTCGTAATG | AAGGACGTGA | 1280 |
| <i>P. taeda</i> (FJ899561)   | 1201 | CCTTGGGGAA | ATGCACCTGG | TGCAGTAGCT | AATCGGGTTG | CTCTAGAAGC | TTGTGTACAA | GCTCGTAATG | AAGGACGTGA | 1280 |
| <i>P. taeda</i> (JQ512592)   | 1201 | CCTTGGGGAA | ATGCACCTGG | TGCAGTAGCT | AATCGGGTTG | CTCTAGAAGC | TTGTGTACAA | GCTCGTAATG | AAGGACGTGA | 1280 |
| <i>P. taeda</i> (KC427273)   | 1201 | CCTTGGGGAA | ATGCACCTGG | TGCAGTAGCT | AATCGGGTTG | CTCTAGAAGC | TTGTGTACAA | GCTCGTAATG | AAGGACGTGA | 1280 |
| <i>P. taeda</i> (KY964286)   | 1201 | CCTTGGGGAA | ATGCACCTGG | TGCAGTAGCT | AATCGGGTTG | CTCTAGAAGC | TTGTGTACAA | GCTCGTAATG | AAGGACGTGA | 1280 |

★★

|                              |      |            |            |            |            |       |      |
|------------------------------|------|------------|------------|------------|------------|-------|------|
| <i>P. rigida</i> (AY724757)  | 1281 | TCTTGCTCGT | GAAGGTAATG | AAGTGATCCG | TGAAGCTGCT | AAATG | 1325 |
| <i>P. rigida</i> (JN854163)  | 1281 | TCTTGCTCGT | GAAGGTAATG | AAGTGATCCG | TGAAGCTGCT | AAATG | 1325 |
| <i>P. rigida</i> (JQ512589)  | 1281 | TCTTGCTCGT | GAAGGTAATG | AAGTGATCCG | TGAAGCTGCT | AAATG | 1325 |
| <i>P. rigida</i> (JQ512587)  | 1281 | TCTTGCTCGT | GAAGGTAATG | AAGTGATCCG | TGAAGCTGCT | AAATG | 1325 |
| <i>P. rigida</i> (MZ424450)  | 1281 | TCTTGCTCGT | GAAGGTAATG | AAGTGATCCG | TGAAGCTGCT | AAATG | 1325 |
| <i>P. rigida</i> (NC_065459) | 1281 | TCTTGCTCGT | GAAGGTAATG | AAGTGATCCG | TGAAGCTGCT | AAATG | 1325 |
| <i>P. taeda</i> (AF119177)   | 1281 | TCTTGCTCGT | GAAGGTAATG | AAGTGATCCG | TGAAGCTTCT | AAATG | 1325 |
| <i>P. taeda</i> (AY724758)   | 1281 | TCTTGCTCGT | GAAGGTAATG | AAGTGATCCG | TGAAGCTTCT | AAATG | 1325 |
| <i>P. taeda</i> (FJ899561)   | 1281 | TCTTGCTCGT | GAAGGTAATG | AAGTGATCCG | TGAAGCTTCT | AAATG | 1325 |
| <i>P. taeda</i> (JQ512592)   | 1281 | TCTTGCTCGT | GAAGGTAATG | AAGTGATCCG | TGAAGCTTCT | AAATG | 1325 |
| <i>P. taeda</i> (KC427273)   | 1281 | TCTTGCTCGT | GAAGGTAATG | AAGTGATCCG | TGAAGCTTCT | AAATG | 1325 |
| <i>P. taeda</i> (KY964286)   | 1281 | TCTTGCTCGT | GAAGGTAATG | AAGTGATCCG | TGAAGCTTGT | AAATG | 1325 |
