# Supplementary material
Source: MDPI journal article supplement (https://www.mdpi.com/1999-4907/14/6/1095)
Supplement: s1 [file s1]

|                                 |     |            |            |            |            |            |            |            |            |            |    |  |
|---------------------------------|-----|------------|------------|------------|------------|------------|------------|------------|------------|------------|----|--|
|                                 |     |            |            |            |            |            |            |            |            | *          |    |  |
| <i>P. taeda</i> (AF119177)      | 1   | TAGTGT     | CGGA       | TTCAAAGCTG | GTGTTAAAGA | TTACAGATTA | ACTTATTATA | CTCCTGAATA | TCAGACCAAG | GATACAGATA | 80 |  |
| <i>P. taeda</i> (AY724758)      | 1   | TAGTGT     | CGGA       | TTCAAAGCTG | GTGTTAAAGA | TTACAGATTA | ACTTATTATA | CTCCTGAATA | TCAGACCAAG | GATACAGATA | 80 |  |
| <i>P. taeda</i> (KC427273)      | 1   | TAGTGT     | CGGA       | TTCAAAGCTG | GTGTTAAAGA | TTACAGATTA | ACTTATTATA | CTCCTGAATA | TCAGACCAAG | GATACAGATA | 80 |  |
| <i>P. taeda</i> (FJ899561)      | 1   | TAGTGT     | CGGA       | TTCAAAGCTG | GTGTTAAAGA | TTACAGATTA | ACTTATTATA | CTCCTGAATA | TCAGACCAAG | GATACAGATA | 80 |  |
| <i>P. taeda</i> (KY964286)      | 1   | TAGTGT     | CGGA       | TTCAAAGCTG | GTGTTAAAGA | TTACAGATTA | ACTTATTATA | CTCCTGAATA | TCAGACCAA  | GATACAGATA | 80 |  |
| <i>P. taeda</i> (JQ512592)      | 1   | TAGTGT     | CGGA       | TTCAAAGCTG | GTGTTAAAGA | TTACAGATTA | ACTTATTATA | CTCCTGAATA | TCAGACCAAG | GATACAGATA | 80 |  |
| <i>P. virginiana</i> (AY947430) | 1   | TAGTGT     | CGGA       | TTCAAAGCTG | GTGTTAAAGA | TTACAGATTA | ACTTATTATA | CTCCTGAATA | TCAGACCAA  | GATACAGATA | 80 |  |
| <i>P. virginiana</i> (JQ512596) | 1   | TAGTGT     | CGGA       | TTCAAAGCTG | GTGTTAAAGA | TTACAGATTA | ACTTATTATA | CTCCTGAATA | TCAGACCAA  | GATACAGATA | 80 |  |
| <i>P. virginiana</i> (JN854155) | 1   | TAGTGT     | CGGA       | TTCAAAGCTG | GTGTTAAAGA | TTACAGATTA | ACTTATTATA | CTCCTGAATA | TCAGACCAA  | GATACAGATA | 80 |  |
|                                 |     |            |            |            |            |            |            |            |            |            |    |  |
| <i>P. taeda</i> (AF119177)      | 81  | TCTTGGCAGC | ATTCCGAGTA | ACTCCTCAAC | CCGGGGTGCC | ACCTGAAGAA | GCGGGAGCAG | CAGTAGCTGC | TGAATCTTCC | 160        |    |  |
| <i>P. taeda</i> (AY724758)      | 81  | TCTTGGCAGC | ATTCCGAGTA | ACTCCTCAAC | CCGGGGTGCC | ACCTGAAGAA | GCGGGAGCAG | CAGTAGCTGC | TGAATCTTCC | 160        |    |  |
| <i>P. taeda</i> (KC427273)      | 81  | TCTTGGCAGC | ATTCCGAGTA | ACTCCTCAAC | CCGGGGTGCC | ACCTGAAGAA | GCGGGAGCAG | CAGTAGCTGC | TGAATCTTCC | 160        |    |  |
| <i>P. taeda</i> (FJ899561)      | 81  | TCTTGGCAGC | ATTCCGAGTA | ACTCCTCAAC | CCGGGGTGCC | ACCTGAAGAA | GCGGGAGCAG | CAGTAGCTGC | TGAATCTTCC | 160        |    |  |
| <i>P. taeda</i> (KY964286)      | 81  | TCTTGGCAGC | ATTCCGAGTA | ACTCCTCAAC | CCGGGGTGCC | ACCTGAAGAA | GCGGGAGCAG | CAGTAGCTGC | TGAATCTTCC | 160        |    |  |
| <i>P. taeda</i> (JQ512592)      | 81  | TCTTGGCAGC | ATTCCGAGTA | ACTCCTCAAC | CCGGGGTGCC | ACCTGAAGAA | GCGGGAGCAG | CAGTAGCTGC | TGAATCTTCC | 160        |    |  |
| <i>P. virginiana</i> (AY947430) | 81  | TCTTGGCAGC | ATTCCGAGTA | ACTCCTCAAC | CCGGGGTGCC | ACCTGAAGAA | GCGGGAGCAG | CAGTAGCTGC | TGAATCTTCC | 160        |    |  |
| <i>P. virginiana</i> (JQ512596) | 81  | TCTTGGCAGC | ATTCCGAGTA | ACTCCTCAAC | CCGGGGTGCC | ACCTGAAGAA | GCGGGAGCAG | CAGTAGCTGC | TGAATCTTCC | 160        |    |  |
| <i>P. virginiana</i> (JN854155) | 81  | TCTTGGCAGC | ATTCCGAGTA | ACTCCTCAAC | CCGGGGTGCC | ACCTGAAGAA | GCGGGAGCAG | CAGTAGCTGC | TGAATCTTCC | 160        |    |  |
|                                 |     |            |            |            |            |            |            |            |            | *          | *  |  |
| <i>P. taeda</i> (AF119177)      | 161 | ACCGGTACAT | GGACCACTGT | TTGGACCGAT | GGACTTACTA | GTCTCGATCG | TTACAAGGGG | CGATGCTATG | ATATCGAGCC | 240        |    |  |
| <i>P. taeda</i> (AY724758)      | 161 | ACCGGTACAT | GGACCACTGT | TTGGACCGAT | GGACTTACTA | GTCTCGATCG | TTACAAGGGG | CGATGCTATG | ATATCGAGCC | 240        |    |  |
| <i>P. taeda</i> (KC427273)      | 161 | ACCGGTACAT | GGACCACTGT | TTGGACCGAT | GGACTTACTA | GTCTCGATCG | TTACAAGGGG | CGATGCTATG | ATATCGAGCC | 240        |    |  |
| <i>P. taeda</i> (FJ899561)      | 161 | ACCGGTACAT | GGACCACTGT | TTGGACCGAT | GGACTTACTA | GTCTCGATCG | TTACAAGGGG | CGATGCTATG | ATATCGAGCC | 240        |    |  |
| <i>P. taeda</i> (KY964286)      | 161 | ACCGGTACAT | GGACCACTGT | TTGGACCGAT | GGACTTACTA | GTCTCGATCG | TTACAAGGGG | CGATGCTATG | ACATCGAGCC | 240        |    |  |
| <i>P. taeda</i> (JQ512592)      | 161 | ACCGGTACAT | GGACCACTGT | TTGGACCGAT | GGACTTACTA | GTCTCGATCG | TTACAAGGGG | CGATGCTATG | ATATCGAGCC | 240        |    |  |
| <i>P. virginiana</i> (AY947430) | 161 | ACCGGTACAT | GGACCACTGT | TTGGACCGAT | GGACTTACTA | GTCTCGATCG | TTACAAGGGG | CGATGCTATG | ACATCGAACC | 240        |    |  |
| <i>P. virginiana</i> (JQ512596) | 161 | ACCGGTACAT | GGACCACTGT | TTGGACCGAT | GGACTTACTA | GTCTCGATCG | TTACAAGGGG | CGATGCTATG | ACATCGAGCC | 240        |    |  |
| <i>P. virginiana</i> (JN854155) | 161 | ACCGGTACAT | GGACCACTGT | TTGGACCGAT | GGACTTACTA | GTCTCGATCG | TTACAAGGGG | CGATGCTATG | ACATCGAACC | 240        |    |  |
|                                 |     |            |            |            |            |            |            |            |            | *          | *  |  |
| <i>P. taeda</i> (AF119177)      | 241 | CGTTCCTGGA | GAGGAGACTC | AATTTATTGC | CTATGTAGCT | TACCCCTTAG | ACCTTTTCGA | AGAAGGTTCT | GTTACTAACT | 320        |    |  |
| <i>P. taeda</i> (AY724758)      | 241 | CGTTCCTGGA | GAGGAGACTC | AATTTATTGC | CTATGTAGCT | TACCCCTTAG | ACCTTTTCGA | AGAAGGTTCT | GTTACTAACT | 320        |    |  |
| <i>P. taeda</i> (KC427273)      | 241 | CGTTCCTGGA | GAGGAGACTC | AATTTATTGC | CTATGTAGCT | TACCCCTTAG | ACCTTTTCGA | AGAAGGTTCT | GTTACTAACT | 320        |    |  |
| <i>P. taeda</i> (FJ899561)      | 241 | CGTTCCTGGA | GAGGAGACTC | AATTTATTGC | CTATGTAGCT | TACCCCTTAG | ACCTTTTCGA | AGAAGGTTCT | GTTACTAACT | 320        |    |  |
| <i>P. taeda</i> (KY964286)      | 241 | CGTTCCTGGA | GAGGAGACTC | AATTTATTGC | CTATGTAGCT | TACCCCTTAG | ACCTTTTCGA | AGAAGGTTCT | GTTACTAACT | 320        |    |  |
| <i>P. taeda</i> (JQ512592)      | 241 | CGTTCCTGGA | GAGGAGACTC | AATTTATTGC | CTATGTAGCT | TACCCCTTAG | ACCTTTTCGA | AGAAGGTTCT | GTTACTAACT | 320        |    |  |
| <i>P. virginiana</i> (AY947430) | 241 |            |            |            |            |            |            |            |            |            |    |  |

|                                 |     |            |            |            |            |            |            |            |            |     |  |
|---------------------------------|-----|------------|------------|------------|------------|------------|------------|------------|------------|-----|--|
|                                 |     |            |            |            |            | *          |            |            |            |     |  |
| <i>P. taeda</i> (AF119177)      | 321 | TGTTCACTTC | CATTGTAGGT | AATGTATTTG | GATTCAAGGC | CCTACGGGCT | CTACGTTTGG | AAGATTTGCG | GATTCCCCCT | 400 |  |
| <i>P. taeda</i> (AY724758)      | 321 | TGTTCACTTC | CATTGTAGGT | AATGTATTTG | GATTCAAGGC | CCTACGGGCT | CTACGTTTGG | AAGATTTGCG | GATTCCCCCT | 400 |  |
| <i>P. taeda</i> (KC427273)      | 321 | TGTTCACTTC | CATTGTAGGT | AATGTATTTG | GATTCAAGGC | CCTACGGGCT | CTACGTTTGG | AAGATTTGCG | GATTCCCCCT | 400 |  |
| <i>P. taeda</i> (FJ899561)      | 321 | TGTTCACTTC | CATTGTAGGT | AATGTATTTG | GATTCAAGGC | CCTACGGGCT | CTACGTTTGG | AAGATTTGCG | GATTCCCCCT | 400 |  |
| <i>P. taeda</i> (KY964286)      | 321 | TGTTCACTTC | CATTGTAGGT | AATGTATTTG | GATTCAAGGC | CCTACGGGCT | CTACGTTTGG | AAGATTTGCG | GATTCCCCCT | 400 |  |
| <i>P. taeda</i> (JQ512592)      | 321 | TGTTCACTTC | CATTGTAGGT | AATGTATTTG | GATTCAAGGC | CCTACGGGCT | CTACGTTTGG | AAGATTTGCG | GATTCCCCCT | 400 |  |
| <i>P. virginiana</i> (AY947430) | 321 | TGTTCACTTC | CATTGTAGGT | AATGTATTTG | GATTCAAGGC | CCTACGGGCT | CTACGTTTGG | AAGATTTGCG | GATTCCCCCT | 400 |  |
| <i>P. virginiana</i> (JQ512596) | 321 | TGTTCACTTC | CATTGTAGGT | AATGTATTTG | GATTCAAGGC | CCTACGGGCT | CTACGTTTGG | AAGATTTGCG | GATTCCCCCT | 400 |  |
| <i>P. virginiana</i> (JN854155) | 321 | TGTTCACTTC | CATTGTAGGT | AATGTATTTG | GATTCAAGGC | CCTACGGGCT | CTACGTTTGG | AAGATTTGCG | GATTCCCCCT | 400 |  |

|                                 |     |            |            |            |            |            |            |            |         |         |
|---------------------------------|-----|------------|------------|------------|------------|------------|------------|------------|---------|---------|
|                                 |     | *          |            |            |            | *          |            |            |         | *       |
| <i>P. taeda</i> (AF119177)      | 401 | GCTTATTCCA | AAACTTTTCA | GGGTCCACCT | CATGGTATCC | AGGTTGAAAG | AGATAAATTG | AACAAATATG | GTCGTCC | TTT 480 |
| <i>P. taeda</i> (AY724758)      | 401 | GCTTATTCCA | AAACTTTTCA | GGGTCCACCT | CATGGTATCC | AGGTTGAAAG | AGATAAATTG | AACAAATATG | GTCGTCC | TTT 480 |
| <i>P. taeda</i> (KC427273)      | 401 | GCTTATTCCA | AAACTTTTCA | GGGTCCACCT | CATGGTATCC | AGGTTGAAAG | AGATAAATTG | AACAAATATG | GTCGTCC | TTT 480 |
| <i>P. taeda</i> (FJ899561)      | 401 | GCTTATTCCA | AAACTTTTCA | GGGTCCACCT | CATGGTATCC | AGGTTGAAAG | AGATAAATTG | AACAAATATG | GTCGTCC | TTT 480 |
| <i>P. taeda</i> (KY964286)      | 401 | TCTTATTCCA | AAACTTTTCA | GGGTCCACCT | CATGGTATCC | AGGTTGAAAG | AGATAAATTG | AACAAATATG | GTCGTCC | TTT 480 |
| <i>P. taeda</i> (JQ512592)      | 401 | GCTTATTCCA | AAACTTTTCA | GGGTCCACCT | CATGGTATCC | AGGTTGAAAG | AGATAAATTG | AACAAATATG | GTCGTCC | TTT 480 |
| <i>P. virginiana</i> (AY947430) | 401 | GCTTATTCCA | AAACTTTTCA | GGGTCCACCT | CATGGTATCC | AGGTTGAAAG | AGATAAATTG | AACAAATATG | GTCGTCC | ATT 480 |
| <i>P. virginiana</i> (JQ512596) | 401 | TCTTATTCCA | AAACTTTTCA | GGGTCCACCT | CATGGTATCC | AGGTTGAAAG | AGATAAATTG | AACAAATATG | GTCGTCC | TTT 480 |
| <i>P. virginiana</i> (JN854155) | 401 | GCTTATTCCA | AAACTTTTCA | GGGTCCACCT | CATGGTATCC | AGGTTGAAAG | AGATAAATTG | AACAAATATG | GTCGTCC | ATT 480 |

|                                 |     |            |            |            |            |            |            |            |            |     |
|---------------------------------|-----|------------|------------|------------|------------|------------|------------|------------|------------|-----|
| <i>P. taeda</i> (AF119177)      | 481 | ATTGGGATGT | ACTATCAAAC | CAAAATTGGG | TCTATCAGCC | AAAAACTATG | GTAGAGCAGT | TTACGAATGT | CTCCGTGGTG | 560 |
| <i>P. taeda</i> (AY724758)      | 481 | ATTGGGATGT | ACTATCAAAC | CAAAATTGGG | TCTATCAGCC | AAAAACTATG | GTAGAGCAGT | TTACGAATGT | CTCCGTGGTG | 560 |
| <i>P. taeda</i> (KC427273)      | 481 | ATTGGGATGT | ACTATCAAAC | CAAAATTGGG | TCTATCAGCC | AAAAACTATG | GTAGAGCAGT | TTACGAATGT | CTCCGTGGTG | 560 |
| <i>P. taeda</i> (FJ899561)      | 481 | ATTGGGATGT | ACTATCAAAC | CAAAATTGGG | TCTATCAGCC | AAAAACTATG | GTAGAGCAGT | TTACGAATGT | CTCCGTGGTG | 560 |
| <i>P. taeda</i> (KY964286)      | 481 | ATTGGGATGT | ACTATCAAAC | CAAAATTGGG | TCTATCAGCC | AAAAACTATG | GTAGAGCAGT | TTACGAATGT | CTCCGTGGTG | 560 |
| <i>P. taeda</i> (JQ512592)      | 481 | ATTGGGATGT | ACTATCAAAC | CAAAATTGGG | TCTATCAGCC | AAAAACTATG | GTAGAGCAGT | TTACGAATGT | CTCCGTGGTG | 560 |
| <i>P. virginiana</i> (AY947430) | 481 | ATTGGGATGT | ACTATCAAAC | CAAAATTGGG | TCTATCAGCC | AAAAACTATG | GTAGAGCAGT | TTACGAATGT | CTCCGTGGTG | 560 |
| <i>P. virginiana</i> (JQ512596) | 481 | ATTGGGATGT | ACTATCAAAC | CAAAATTGGG | TCTATCAGCC | AAAAACTATG | GTAGAGCAGT | TTACGAATGT | CTCCGTGGTG | 560 |
| <i>P. virginiana</i> (JN854155) | 481 | ATTGGGATGT | ACTATCAAAC | CAAAATTGGG | TCTATCAGCC | AAAAACTATG | GTAGAGCAGT | TTACGAATGT | CTCCGTGGTG | 560 |

|                                 |     |            |            |            |            |             |            |            |          |         |
|---------------------------------|-----|------------|------------|------------|------------|-------------|------------|------------|----------|---------|
|                                 |     |            |            |            |            |             |            |            |          | *       |
| <i>P. taeda</i> (AF119177)      | 561 | GACTCGATTT | TACTAAGGAT | GATGAGAACG | TAAATTCCCA | ACCATTTCATG | CGCTGGAGAG | ATCGTTTTGT | CTTTTGTG | GCG 640 |
| <i>P. taeda</i> (AY724758)      | 561 | GACTCGATTT | TACTAAGGAT | GATGAGAACG | TAAATTCCCA | ACCATTTCATG | CGCTGGAGAG | ATCGTTTTGT | CTTTTGTG | GCG 640 |
| <i>P. taeda</i> (KC427273)      | 561 | GACTCGATTT | TACTAAGGAT | GATGAGAACG | TAAATTCCCA | ACCATTTCATG | CGCTGGAGAG | ATCGTTTTGT | CTTTTGTG | GCG 640 |
| <i>P. taeda</i> (FJ899561)      | 561 | GACTCGATTT | TACTAAGGAT | GATGAGAACG | TAAATTCCCA | ACCATTTCATG | CGCTGGAGAG | ATCGTTTTGT | CTTTTGTG | GCG 640 |
| <i>P. taeda</i> (KY964286)      | 561 | GACTCGATTT | TACTAAGGAT | GATGAGAACG | TAAATTCCCA | ACCATTTCATG | CGCTGGAGAG | ATCGTTTTGT | CTTTTGTG | GCG 640 |
| <i>P. taeda</i> (JQ512592)      | 561 | GACTCGATTT | TACTAAGGAT | GATGAGAACG | TAAATTCCCA | ACCATTTCATG | CGCTGGAGAG | ATCGTTTTGT | CTTTTGTG | GCG 640 |
| <i>P. virginiana</i> (AY947430) | 561 | GACTCGATTT | TACTAAGGAT | GATGAGAACG | TAAATTCCCA | ACCATTTCATG | CGCTGGAGAG | ATCGTTTTGT | CTTTTGTG | GCA 640 |
| <i>P. virginiana</i> (JQ512596) | 561 | GACTCGATTT | TACTAAGGAT | GATGAGAACG | TAAATTCCCA | ACCATTTCATG | CGCTGGAGAG | ATCGTTTTGT | CTTTTGTG | GCG 640 |
| <i>P. virginiana</i> (JN854155) | 561 | GACTCGATTT | TACTAAGGAT | GATGAGAACG | TAAATTCCCA | ACCATTTCATG | CGCTGGAGAG | ATCGTTTTGT | CTTTTGTG | GCA 640 |

|                                 |     |                    | *          | *          |            |            |            |            |            |     |  |
|---------------------------------|-----|--------------------|------------|------------|------------|------------|------------|------------|------------|-----|--|
| <i>P. taeda</i> (AF119177)      | 641 | GAAGCAATTT         | ATAAGGCTCA | GGCTGAGACG | GGTGAAATTA | AGGGACATTA | TTTGAATGCT | ACTGCAGGTA | CATGTGAAGA | 720 |  |
| <i>P. taeda</i> (AY724758)      | 641 | GAAGCAATTT         | ATAAGGCTCA | GGCTGAGACG | GGTGAAATTA | AGGGACATTA | TTTGAATGCT | ACTGCAGGTA | CATGTGAAGA | 720 |  |
| <i>P. taeda</i> (KC427273)      | 641 | GAAGCAATTT         | ATAAGGCTCA | GGCTGAGACG | GGTGAAATTA | AGGGACATTA | TTTGAATGCT | ACTGCAGGTA | CATGTGAAGA | 720 |  |
| <i>P. taeda</i> (FJ899561)      | 641 | GAAGCAATTT         | ATAAGGCTCA | GGCTGAGACG | GGTGAAATTA | AGGGACATTA | TTTGAATGCT | ACTGCAGGTA | CATGTGAAGA | 720 |  |
| <i>P. taeda</i> (KY964286)      | 641 | GAAGCAATT <b>A</b> | ATAAGGCTCA | GGCTGAGACG | GGTGAAATTA | AGGGACATTA | TTTGAATGCT | ACTGCAGGTA | CATGTGAAGA | 720 |  |
| <i>P. taeda</i> (JQ512592)      | 641 | GAAGCAATTT         | ATAAGGCTCA | GGCTGAGACG | GGTGAAATTA | AGGGACATTA | TTTGAATGCT | ACTGCAGGTA | CATGTGAAGA | 720 |  |
| <i>P. virginiana</i> (AY947430) | 641 | GAAGCAATTT         | ATAAGGCTCA | GGCTGAGACG | GGTGAAATTA | AGGGACATTA | TTTGAATGCT | ACTGCAGGTA | CATGTGAAGA | 720 |  |
| <i>P. virginiana</i> (JQ512596) | 641 | GAAGCAATT <b>A</b> | ATAAGGCCA  | GGCTGAGACG | GGTGAAATTA | AGGGACATTA | TTTGAATGCT | ACTGCAGGTA | CATGTGAAGA | 720 |  |
| <i>P. virginiana</i> (JN854155) | 641 | GAAGCAATTT         | ATAAGGCTCA | GGCTGAGACG | GGTGAAATTA | AGGGACATTA | TTTGAATGCT | ACTGCAGGTA | CATGTGAAGA | 720 |  |

|                                 |     |            |            |            |                     |            |            |            |            |      |  |  |  |
|---------------------------------|-----|------------|------------|------------|---------------------|------------|------------|------------|------------|------|--|--|--|
|                                 |     |            |            |            | *                   |            |            |            |            |      |  |  |  |
| <i>P. taeda</i> (AF119177)      | 961 | TACTGTAGTA | GGTAAACTTG | AAGGGGAACG | AGAC <b>G</b> TAACT | TTAGGGTTTG | TTGATCTACT | GCGTGATGAT | TTTATCGAAA | 1040 |  |  |  |
| <i>P. taeda</i> (AY724758)      | 961 | TACTGTAGTA | GGTAAACTTG | AAGGGGAACG | AGAC <b>G</b> TAACT | TTAGGGTTTG | TTGATCTACT | GCGTGATGAT | TTTATCGAAA | 1040 |  |  |  |
| <i>P. taeda</i> (KC427273)      | 961 | TACTGTAGTA | GGTAAACTTG | AAGGGGAACG | AGAC <b>G</b> TAACT | TTAGGGTTTG | TTGATCTACT | GCGTGATGAT | TTTATCGAAA | 1040 |  |  |  |
| <i>P. taeda</i> (FJ899561)      | 961 | TACTGTAGTA | GGTAAACTTG | AAGGGGAACG | AGAC <b>G</b> TAACT | TTAGGGTTTG | TTGATCTACT | GCGTGATGAT | TTTATCGAAA | 1040 |  |  |  |
| <i>P. taeda</i> (KY964286)      | 961 | TACTGTAGTA | GGTAAACTTG | AAGGGGAACG | AGAC <b>G</b> TAACT | TTAGGGTTTG | TTGATCTACT | GCGTGATGAT | TTTATCGAAA | 1040 |  |  |  |
| <i>P. taeda</i> (JQ512592)      | 961 | TACTGTAGTA | GGTAAACTTG | AAGGGGAACG | AGAC <b>G</b> TAACT | TTAGGGTTTG | TTGATCTACT | GCGTGATGAT | TTTATCGAAA | 1040 |  |  |  |
| <i>P. virginiana</i> (AY947430) | 961 | TACTGTAGTA | GGTAAACTTG | AAGGGGAACG | AGAC <b>A</b> TAACT | TTAGGGTTTG | TTGATCTACT | GCGTGATGAT | TTTATCGAAA | 1040 |  |  |  |
| <i>P. virginiana</i> (JQ512596) | 961 | TACTGTAGTA | GGTAAACTTG | AAGGGGAACG | AGAC <b>G</b> TAACT | TTAGGGTTTG | TTGATCTACT | GCGTGATGAT | TTTATCGAAA | 1040 |  |  |  |
| <i>P. virginiana</i> (JN854155) | 961 | TACTGTAGTA | GGTAAACTTG | AAGGGGAACG | AGAC <b>A</b> TAACT | TTAGGGTTTG | TTGATCTACT | GCGTGATGAT | TTTATCGAAA | 1040 |  |  |  |

|                                 |      |            |            |            |            |            |            |            |            |      |
|---------------------------------|------|------------|------------|------------|------------|------------|------------|------------|------------|------|
| <i>P. taeda</i> (AF119177)      | 1041 | AAGATCGAAG | TCGTGGTATT | TACTTCACTC | AAGATTGGGT | ATCTATGCCA | GGTGTCTGCC | CGTAGCTTCA | GGAGGTATTC | 1120 |
| <i>P. taeda</i> (AY724758)      | 1041 | AAGATCGAAG | TCGTGGTATT | TACTTCACTC | AAGATTGGGT | ATCTATGCCA | GGTGTCTGCC | CGTAGCTTCA | GGAGGTATTC | 1120 |
| <i>P. taeda</i> (KC427273)      | 1041 | AAGATCGAAG | TCGTGGTATT | TACTTCACTC | AAGATTGGGT | ATCTATGCCA | GGTGTCTGCC | CGTAGCTTCA | GGAGGTATTC | 1120 |
| <i>P. taeda</i> (FJ899561)      | 1041 | AAGATCGAAG | TCGTGGTATT | TACTTCACTC | AAGATTGGGT | ATCTATGCCA | GGTGTCTGCC | CGTAGCTTCA | GGAGGTATTC | 1120 |
| <i>P. taeda</i> (KY964286)      | 1041 | AAGATCGAAG | TCGTGGTATT | TACTTCACTC | AAGATTGGGT | ATCTATGCCA | GGTGTCTGCC | CGTAGCTTCA | GGAGGTATTC | 1120 |
| <i>P. taeda</i> (JQ512592)      | 1041 | AAGATCGAAG | TCGTGGTATT | TACTTCACTC | AAGATTGGGT | ATCTATGCCA | GGTGTCTGCC | CGTAGCTTCA | GGAGGTATTC | 1120 |
| <i>P. virginiana</i> (AY947430) | 1041 | AAGATCGAAG | TCGTGGTATT | TACTTCACTC | AAGATTGGGT | ATCTATGCCA | GGTGTCTGCC | CGTAGCTTCA | GGAGGTATTC | 1120 |
| <i>P. virginiana</i> (JQ512596) | 1041 | AAGATCGAAG | TCGTGGTATT | TACTTCACTC | AAGATTGGGT | ATCTATGCCA | GGTGTCTGCC | CGTAGCTTCA | GGAGGTATTC | 1120 |
| <i>P. virginiana</i> (JN854155) | 1041 | AAGATCGAAG | TCGTGGTATT | TACTTCACTC | AAGATTGGGT | ATCTATGCCA | GGTGTCTGCC | CGTAGCTTCA | GGAGGTATTC | 1120 |

|                                 |      |            |            |            |            |            |            |            |            |      |
|---------------------------------|------|------------|------------|------------|------------|------------|------------|------------|------------|------|
| <i>P. taeda</i> (AF119177)      | 1121 | ACGTTTGGCA | TATGCCTGCT | CTGACCGAGA | TCTTTGGGGA | TGATTCCGTA | CTACAGTTTG | GTGGGGGAAC | TTTGGGACAT | 1200 |
| <i>P. taeda</i> (AY724758)      | 1121 | ACGTTTGGCA | TATGCCTGCT | CTGACCGAGA | TCTTTGGGGA | TGATTCCGTA | CTACAGTTTG | GTGGGGGAAC | TTTGGGACAT | 1200 |
| <i>P. taeda</i> (KC427273)      | 1121 | ACGTTTGGCA | TATGCCTGCT | CTGACCGAGA | TCTTTGGGGA | TGATTCCGTA | CTACAGTTTG | GTGGGGGAAC | TTTGGGACAT | 1200 |
| <i>P. taeda</i> (FJ899561)      | 1121 | ACGTTTGGCA | TATGCCTGCT | CTGACCGAGA | TCTTTGGGGA | TGATTCCGTA | CTACAGTTTG | GTGGGGGAAC | TTTGGGACAT | 1200 |
| <i>P. taeda</i> (KY964286)      | 1121 | ACGTTTGGCA | TATGCCTGCT | CTGACCGAGA | TCTTTGGGGA | TGATTCCGTA | CTACAGTTTG | GTGGGGGAAC | TTTGGGACAT | 1200 |
| <i>P. taeda</i> (JQ512592)      | 1121 | ACGTTTGGCA | TATGCCTGCT | CTGACCGAGA | TCTTTGGGGA | TGATTCCGTA | CTACAGTTTG | GTGGGGGAAC | TTTGGGACAT | 1200 |
| <i>P. virginiana</i> (AY947430) | 1121 | ACGTTTGGCA | TATGCCTGCT | CTGACCGAGA | TCTTTGGGGA | TGATTCCGTA | CTACAGTTTG | GTGGGGGAAC | TTTGGGACAT | 1200 |
| <i>P. virginiana</i> (JQ512596) | 1121 | ACGTTTGGCA | TATGCCTGCT | CTGACCGAGA | TCTTTGGGGA | TGATTCCGTA | CTACAGTTTG | GTGGGGGAAC | TTTGGGACAT | 1200 |
| <i>P. virginiana</i> (JN854155) | 1121 | ACGTTTGGCA | TATGCCTGCT | CTGACCGAGA | TCTTTGGGGA | TGATTCCGTA | CTACAGTTTG | GTGGGGGAAC | TTTGGGACAT | 1200 |

|                                 |      |            |            |                     |            |            |            |            |            |      |  |  |  |
|---------------------------------|------|------------|------------|---------------------|------------|------------|------------|------------|------------|------|--|--|--|
|                                 |      |            |            |                     | *          |            |            |            |            |      |  |  |  |
| <i>P. taeda</i> (AF119177)      | 1201 | CCTTGGGGAA | ATGCACCTGG | TGCAG <b>T</b> AGCT | AATCGGGTTG | CTCTAGAAGC | TTGTGTACAA | GCTCGTAATG | AAGGACGTGA | 1280 |  |  |  |
| <i>P. taeda</i> (AY724758)      | 1201 | CCTTGGGGAA | ATGCACCTGG | TGCAG <b>T</b> AGCT | AATCGGGTTG | CTCTAGAAGC | TTGTGTACAA | GCTCGTAATG | AAGGACGTGA | 1280 |  |  |  |
| <i>P. taeda</i> (KC427273)      | 1201 | CCTTGGGGAA | ATGCACCTGG | TGCAG <b>T</b> AGCT | AATCGGGTTG | CTCTAGAAGC | TTGTGTACAA | GCTCGTAATG | AAGGACGTGA | 1280 |  |  |  |
| <i>P. taeda</i> (FJ899561)      | 1201 | CCTTGGGGAA | ATGCACCTGG | TGCAG <b>T</b> AGCT | AATCGGGTTG | CTCTAGAAGC | TTGTGTACAA | GCTCGTAATG | AAGGACGTGA | 1280 |  |  |  |
| <i>P. taeda</i> (KY964286)      | 1201 | CCTTGGGGAA | ATGCACCTGG | TGCAG <b>T</b> AGCT | AATCGGGTTG | CTCTAGAAGC | TTGTGTACAA | GCTCGTAATG | AAGGACGTGA | 1280 |  |  |  |
| <i>P. taeda</i> (JQ512592)      | 1201 | CCTTGGGGAA | ATGCACCTGG | TGCAG <b>T</b> AGCT | AATCGGGTTG | CTCTAGAAGC | TTGTGTACAA | GCTCGTAATG | AAGGACGTGA | 1280 |  |  |  |
| <i>P. virginiana</i> (AY947430) | 1201 | CCTTGGGGAA | ATGCACCTGG | TGCAG <b>T</b> AGCT | AATCGGGTTG | CTCTAGAAGC | TTGTGTACAA | GCTCGTAATG | AAGGACGTGA | 1280 |  |  |  |
| <i>P. virginiana</i> (JQ512596) | 1201 | CCTTGGGGAA | ATGCACCTGG | TGCAG <b>C</b> AGCT | AATCGGGTTG | CTCTAGAAGC | TTGTGTACAA | GCTCGTAATG | AAGGACGTGA | 1280 |  |  |  |
| <i>P. virginiana</i> (JN854155) | 1201 | CCTTGGGGAA | ATGCACCTGG | TGCAG <b>T</b> AGCT | AATCGGGTTG | CTCTAGAAGC | TTGTGTACAA | GCTCGTAATG | AAGGACGTGA | 1280 |  |  |  |

\*\*\*

|                                 |      |            |            |            |                    |       |      |
|---------------------------------|------|------------|------------|------------|--------------------|-------|------|
| <i>P. taeda</i> (AF119177)      | 1281 | TCTTGCTCGT | GAAGGTAATG | AAGTGATCCG | TGAAGC <b>TTCT</b> | AAATG | 1325 |
| <i>P. taeda</i> (AY724758)      | 1281 | TCTTGCTCGT | GAAGGTAATG | AAGTGATCCG | TGAAGC <b>TTCT</b> | AAATG | 1325 |
| <i>P. taeda</i> (KC427273)      | 1281 | TCTTGCTCGT | GAAGGTAATG | AAGTGATCCG | TGAAGC <b>TTCT</b> | AAATG | 1325 |
| <i>P. taeda</i> (FJ899561)      | 1281 | TCTTGCTCGT | GAAGGTAATG | AAGTGATCCG | TGAAGC <b>TTCT</b> | AAATG | 1325 |
| <i>P. taeda</i> (KY964286)      | 1281 | TCTTGCTCGT | GAAGGTAATG | AAGTGATCCG | TGAAGC <b>TTGT</b> | AAATG | 1325 |
| <i>P. taeda</i> (JQ512592)      | 1281 | TCTTGCTCGT | GAAGGTAATG | AAGTGATCCG | TGAAGC <b>TTCT</b> | AAATG | 1325 |
| <i>P. virginiana</i> (AY947430) | 1281 | TCTTGCTCGT | GAAGGTAATG | AAGTGATCCG | TGAAGC <b>AGCT</b> | AAATG | 1325 |
| <i>P. virginiana</i> (JQ512596) | 1281 | TCTTGCTCGT | GAAGGTAATG | AAGTGATCCG | TGAAGC <b>TTGT</b> | AAATG | 1325 |
| <i>P. virginiana</i> (JN854155) | 1281 | TCTTGCTCGT | GAAGGTAATG | AAGTGATCCG | TGAAGC <b>AGCT</b> | AAATG | 1325 |
